# Supplementary material
Source: PubMed Central journal article supplement (PMC8819921)

# Supplementary Information for

## Deep Learning to Design Nuclear-Targeting Abiotic Miniproteins

**Authors:** Carly K. Schissel<sup>1†</sup>, Somesh Mohapatra<sup>2†</sup>, Justin M. Wolfe<sup>1#</sup>, Colin M. Fadzen<sup>1‡</sup>, Kamela Bellovoda<sup>3</sup>, Chia-Ling Wu<sup>3</sup>, Jenna A. Wood<sup>3</sup>, Annika B. Malmberg<sup>3</sup>, Andrei Loas<sup>1</sup>, Rafael Gómez-Bombarelli<sup>2\*</sup>, Bradley L. Pentelute<sup>1,4,5,6\*</sup>

### Affiliations:

<sup>1</sup>Massachusetts Institute of Technology, Department of Chemistry, 77 Massachusetts Avenue, Cambridge, MA 02139, USA

<sup>2</sup>Massachusetts Institute of Technology, Department of Materials Science and Engineering, 77 Massachusetts Avenue, Cambridge, MA 02139, USA

<sup>3</sup>Sarepta Therapeutics, 215 First Street, Cambridge, MA 02142, USA

<sup>4</sup>The Koch Institute for Integrative Cancer Research, Massachusetts Institute of Technology, 500 Main Street, Cambridge, MA 02142, USA

<sup>5</sup>Center for Environmental Health Sciences, Massachusetts Institute of Technology, 77 Massachusetts Avenue, Cambridge, MA 02139, USA

<sup>6</sup>Broad Institute of MIT and Harvard, 415 Main Street, Cambridge, MA 02142, USA

†These authors contributed equally to this work.

#Current address: Ra Pharmaceuticals, 87 Cambridgepark Drive, Cambridge, MA 02140, USA

‡Current address: Harvard Medical School, 25 Shattuck Street, Boston, MA 02115, USA

\*Correspondence to: blp@mit.edu, rafagb@mit.edu

# Table of Contents

|                                                                               |    |
|-------------------------------------------------------------------------------|----|
| <i>1 Materials and General Methods</i> .....                                  | 4  |
| 1.1 Reagents and Solvents .....                                               | 4  |
| 1.2 Liquid-chromatography mass-spectrometry .....                             | 4  |
| 1.3 General method for peptide preparation .....                              | 5  |
| Figure 1. Synthesis route for Mach peptides .....                             | 7  |
| 1.4 PMO-DBCO Synthesis .....                                                  | 7  |
| <i>2 Analysis and benchmarking of CNN model</i> .....                         | 7  |
| 2.1 Benchmarking against regression models .....                              | 7  |
| Table 1. Hyperparameters and optimized hyperparameters .....                  | 8  |
| Figure 2. Parity plots for CNN and other models .....                         | 11 |
| Figure 3. Parity plots .....                                                  | 12 |
| Table 2 .....                                                                 | 13 |
| Table 3 .....                                                                 | 15 |
| 2.2 Benchmarking against classification models .....                          | 16 |
| Table 4 .....                                                                 | 16 |
| Table 5 .....                                                                 | 17 |
| 2.3 Benchmarking against CPP webservers .....                                 | 17 |
| Table 6. Online webservers .....                                              | 18 |
| 2.4 Training CNN model on sequences with lower activity (fold over PMO) ..... | 18 |
| Figure 4. Threshold for extrapolation .....                                   | 19 |
| Table 7 .....                                                                 | 20 |
| 2.5 Training CNN model on sequences by leaving one residue/linker out .....   | 21 |
| Table 8 .....                                                                 | 21 |
| <i>3 Analysis of the role of generator</i> .....                              | 22 |
| Figure 5. Box plots .....                                                     | 22 |
| Table 9 .....                                                                 | 23 |
| <i>4 Analysis of the optimization approach</i> .....                          | 24 |
| 4.1 Analyzing the role of constraints in the optimizer .....                  | 24 |
| Table 10 .....                                                                | 24 |
| 4.2 Optimizing for sequences with all canonical residues .....                | 26 |
| Figure 6. Box plots .....                                                     | 26 |
| Table 11 .....                                                                | 27 |
| <i>5 Attribution analysis</i> .....                                           | 28 |
| 5.1 Interpretability .....                                                    | 28 |

|                                                                                            |     |
|--------------------------------------------------------------------------------------------|-----|
| Figure 7 Activation map of predictor training set relative to amino acid position.....     | 29  |
| Figure 8 Activation map of predictor training dataset relative to fingerprint index.....   | 30  |
| 5.2 Robustness of Attribution Analysis .....                                               | 30  |
| Figure 9. Attribution analysis of mutations .....                                          | 31  |
| 6 Similarity and immunogenicity analysis of predicted sequences .....                      | 31  |
| 6.1 Similarity of Training and Validation Sequences .....                                  | 31  |
| Figure 10 Similarity of sequences used in the training of generator and predictor.....     | 32  |
| Figure 11. Similarity and experimental normalized MFI of Mach and training sequences ..... | 33  |
| 6.2 Immunogenicity Score of Predicted and Library Sequences .....                          | 33  |
| Figure 12. In silico immunogenicity score for Mach and training sequences.....             | 33  |
| 7 Evaluation of PMO-Mach constructs.....                                                   | 34  |
| 7.1 Endocytosis Inhibition Assays.....                                                     | 34  |
| Figure 13. PMO-Mach peptides enter cells by energy-dependent endocytosis .....             | 34  |
| 7.2 Circular Dichroism.....                                                                | 35  |
| Figure 14. Circular dichroism of azide-Mach peptides .....                                 | 35  |
| 7.3 Inflammation panel .....                                                               | 35  |
| Figure 15. PMO-Mach constructs are nonimmunogenic in vitro .....                           | 38  |
| 8 Post-hoc mutations of PMO-Mach miniprotein .....                                         | 38  |
| Figure 16. Mutations of Mach peptides can affect activity.....                             | 38  |
| Figure 17. Truncation of Mach peptides ablates PMO activity .....                          | 39  |
| 9 Recombinant Expression & Purification .....                                              | 39  |
| Supplemental References.....                                                               | 40  |
| Supplemental Figures and Tables .....                                                      | 42  |
| Table 12: List of peptides used for each module in the 600-member library* .....           | 42  |
| Figure 18. Synthesis of modular library.....                                               | 44  |
| Figure 19. Mean fluorescence intensity of 600-member library. ....                         | 45  |
| Table 13. List of Mach peptides .....                                                      | 46  |
| Figure 20. Experimental vs Predicted activity of Mach peptides .....                       | 47  |
| Figure 21. Dose-response in HeLa 654 cells (Activity).....                                 | 48  |
| Figure 22. Dose response curves corresponding to activity and toxicity in HeLa 654.....    | 49  |
| Figure 23. Dose-response in RPTEC (Toxicity).....                                          | 50  |
| Figure 24. Mach peptides enhance delivery of peptide nucleic acid (PNA). ....              | 51  |
| Figure 25. Mach-DTA conjugates produce dose-dependent toxicity in HeLa cells .....         | 52  |
| Figure 26. PMO-Mach constructs do not induce kidney toxicity in mice .....                 | 53  |
| Appendix 1 LC-MS Characterization .....                                                    | 54  |
| Appendix 2 Topological fingerprints.....                                                   | 80  |
| Appendix 3: Example of flow cytometry gating strategy .....                                | 107 |

# 1 Materials and General Methods

## 1.1 Reagents and Solvents

H-Rink Amide-ChemMatrix resin was obtained from PCAS BioMatrix Inc. (St-Jean-sur-Richelieu, Quebec, Canada). 1-[Bis(dimethylamino)methylene]-1*H*-1,2,3-triazolo[4,5-*b*]pyridinium-3-oxid-hexafluorophosphate (HATU), 4-pentynoic acid, 5-azidopentanoic acid, Fmoc- $\beta$ -Ala-OH, Fmoc-6-aminohexanoic acid, and Fmoc-L-Lys(N<sub>3</sub>) were purchased from Chem-Impex International (Wood Dale, IL). PyAOP was purchased from P3 BioSystems (Louisville, KY). Fmoc-protected amino acids (Fmoc-Ala-OHxH<sub>2</sub>O, Fmoc-Arg(Pbf)-OH; Fmoc-Asn(Trt)-OH; Fmoc-Asp(O*t*Bu)-OH; Fmoc-Cys(Trt)-OH; Fmoc-Gln(Trt)-OH; Fmoc-Glu(O*t*Bu)-OH; Fmoc-Gly-OH; Fmoc-His(Trt)-OH; Fmoc-Ile-OH; Fmoc-Leu-OH; Fmoc-Lys(Boc)-OH; Fmoc-Met-OH; Fmoc-Phe-OH; Fmoc-Pro-OH; Fmoc-Ser(But)-OH; Fmoc-Thr(*t*Bu)-OH; Fmoc-Trp(Boc)-OH; Fmoc-Tyr(*t*Bu)-OH; Fmoc-Val-OH), were purchased from the Novabiochem-line from Sigma Millipore. Peptide synthesis-grade *N,N*-dimethylformamide (DMF), CH<sub>2</sub>Cl<sub>2</sub>, diethyl ether, and HPLC-grade acetonitrile were obtained from VWR International (Radnor, PA). All other reagents were purchased from Sigma-Aldrich (St. Louis, MO). Milli-Q water was used exclusively.

## 1.2 Liquid-chromatography mass-spectrometry

LCMS analyses were performed on either an Agilent 6520 Accurate-Mass Q-TOF LCMS (abbreviated as 6520) or an Agilent 6550 iFunnel Q-TOF LCMS system (abbreviated as 6550) coupled to an Agilent 1260 Infinity HPLC system. Mobile phases were: 0.1% formic acid in water (solvent A) and 0.1% formic acid in acetonitrile (solvent B). The following LCMS methods were used for characterization:

### **Method A: 1-61% B over 9 min, Zorbax C3 column (6520)**

LC: Zorbax 300SB-C3 column: 2.1 × 150 mm, 5  $\mu$ m, column temperature: 40 °C, gradient: 0-2 min 1% B, 2-11 min 1-61% B, 11-12 min 61-95% B, 12-15 min 95% B; flow rate: 0.8 mL/min.

MS: Positive electrospray ionization (ESI) extended dynamic range mode in mass range 300–3000 *m/z*. MS is on from 4 to 11 min.

### **Method B: 1-61% B over 10 min, Phenomenex Jupiter C4 column (6550)**

LC: Phenomenex Jupiter C4 column: 1.0 × 150 mm, 5 μm, column temperature: 40 °C, gradient: 0-2 min 1% B, 2-12 min 1-61% B, 12-16 min 61-90% B; 16-20 min 90% B; flow rate: 0.1 mL/min.

MS: Positive electrospray ionization (ESI) extended dynamic range mode in mass range 100–1700 *m/z*. MS is on from 4 to 12 min.

### **Method C: 1-61% B over 10 min, Agilent EclipsePlus C18 column (6550)**

LC: Agilent EclipsePlus C18 RRHD column: 2.1 × 50 mm, 1.8 μm, column temperature: 40 °C, gradient: 0-2 min 1% B, 2-12 min, 1-61% B, 12-13 min, 61% B, 13-16 min, 1% B; flow rate: 0.1 mL/min.

MS: Positive electrospray ionization (ESI) extended dynamic range mode in mass range 300–3000 *m/z*. MS is on from 4 to 12 min. This method was used exclusively for characterization of the modular library.

All data were processed using Agilent MassHunter software package. Y-axis in all chromatograms shown represents total ion current (TIC) unless noted.

## **1.3 General method for peptide preparation**

Fast-flow Peptide Synthesis: Peptides were synthesized on a 0.1 mmol scale using an automated fast-flow peptide synthesizer. A 100 mg portion of ChemMatrix Rink Amide HYR resin was loaded into a reactor maintained at 90 °C. All reagents were flowed at 40 mL/min with HPLC pumps through a stainless-steel loop maintained at 90 °C before introduction into the reactor. For each coupling, 10 mL of a solution containing 0.4 M amino acid and 0.38 M HATU in DMF were mixed with 600 μL diisopropylethylamine and delivered to the reactor. Fmoc removal was accomplished using 10.4 mL of 20% (v/v) piperidine. Between each step, DMF (15 mL) was used to wash out the reactor. For peptides in the modular library, special coupling conditions were used for arginine, in which 10 mL of a solution containing 0.4 M Fmoc-L-Arg(Pbf)-OH and 0.38 M PyAOP in DMF were mixed with 600 μL diisopropylethylamine and delivered to the reactor. For Mach peptides, additional special coupling conditions were used according to the optimized peptide synthesis protocol.<sup>1</sup> To couple unnatural amino acids or to cap the peptide (e.g. with 4-pentynoic acid), the resin was incubated for 30 min at room temperature with amino acid (1 mmol) dissolved in 2.5 mL 0.4 M HATU in DMF with 500 μL diisopropylethylamine. After completion of the synthesis, the resin was washed 3 times with dichloromethane and dried under vacuum.

Peptide Cleavage and Deprotection: Each peptide was subjected to simultaneous global side-chain deprotection and cleavage from resin by treatment with 5 mL of 94% trifluoroacetic acid (TFA), 2.5% 1,2-ethanedithiol (EDT), 2.5% water, and 1% triisopropylsilane (TIPS) (v/v) for 7 min at 60 °C or at room temperature for 2 to 4 hours. For arginine-rich sequences, the resin was treated with a cleavage cocktail consisting of 82.5% TFA, 5% phenol, 5% thioanisole, 5% water, and 2.5% EDT (v/v) for 14 hours at room temperature. For peptides containing azide, EDT was substituted for thioanisole. The cleavage cocktail was first concentrated by bubbling N<sub>2</sub> through the mixture, and cleaved peptide was precipitated and triturated with 40 mL of cold ether (chilled in dry ice). The crude product was pelleted by centrifugation for three minutes at 4,000 rpm and the ether was decanted. This wash step was repeated two more times. After the third wash, the pellet was dissolved in 50% water and 50% acetonitrile containing 0.1% TFA, filtered through a fritted syringe to remove the resin and lyophilized.

Peptide Purification: The peptides were dissolved in water and acetonitrile containing 0.1% TFA, filtered through a 0.22 µm nylon filter and purified by mass-directed semi-preparative reversed-phase HPLC. Solvent A was water with 0.1% TFA additive and Solvent B was acetonitrile with 0.1% TFA additive. A linear gradient that changed at a rate of 0.5% B/min was used. Most of the peptides were purified on an Agilent Zorbax SB C3 column: 9.4 x 250 mm, 5 µm. Extremely hydrophilic peptides, such as the arginine-rich sequences were purified on an Agilent Zorbax SB C18 column: 9.4 x 250 mm, 5 µm. Using mass data about each fraction from the instrument, only pure fractions were pooled and lyophilized. The purity of the fraction pool was confirmed by LC-MS.

Macrocyclization: Mach12 and Mach13 contained cysteine linked macrocycles. Purified unprotected peptide (1 mM) was dissolved in DMF with decafluorobiphenyl (2 mM) and DIEA (50 mM) and incubated at room temperature for 3 h. The solution was then diluted 100-fold in 1% acetonitrile, 2% TFA in water and purified directly by reverse-phase HPLC.

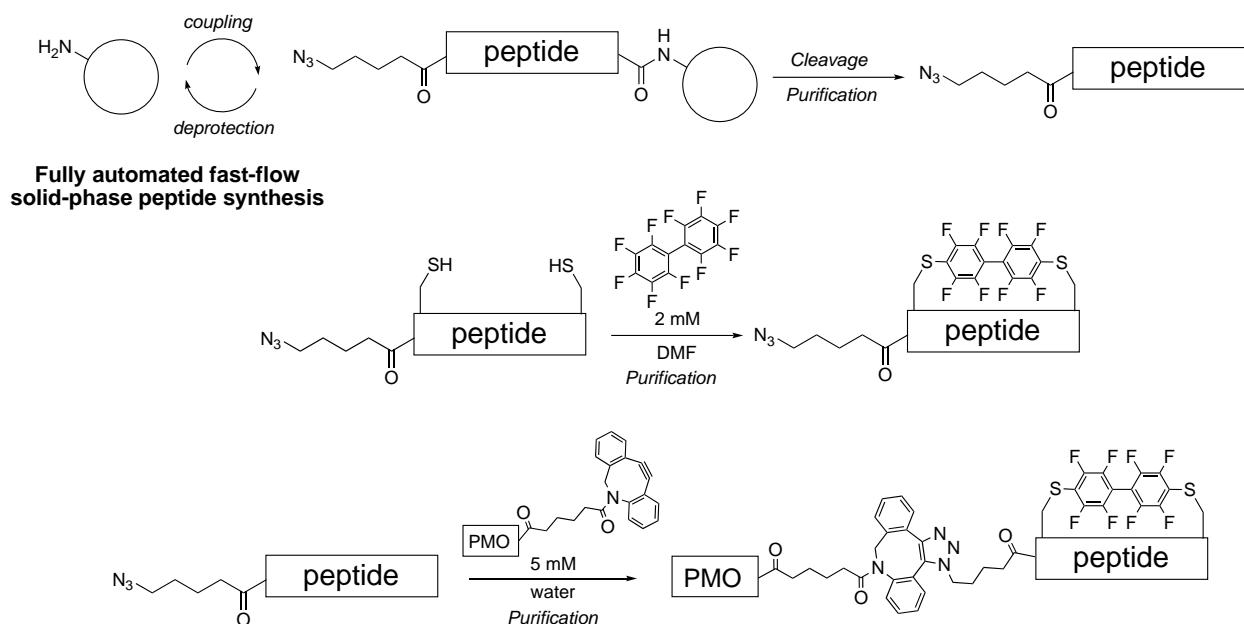

## 1.4 PMO-DBCO Synthesis

PMO IVS-654 (50 mg, 8  $\mu$ mol) was dissolved in 150  $\mu$ L DMSO. To the solution was added a solution containing 2 equivalents of dibenzocyclooctyne acid (5.3 mg, 16  $\mu$ mol) activated with HBTU (37.5  $\mu$ L of 0.4 M HBTU in DMF, 15  $\mu$ mol) and DIEA (2.8  $\mu$ L, 16  $\mu$ mol) in 40  $\mu$ L DMF (Final reaction volume = 0.23 mL). The reaction proceeded for 25 min before being quenched with 1 mL of water and 2 mL of ammonium hydroxide. The ammonium hydroxide hydrolyzed any ester formed during the course of the reaction. After 1 hour, the solution was diluted to 40 mL in water/acetonitrile and purified using reverse-phase HPLC (Agilent Zorbax SB C3 column: 21.2 x 100 mm, 5  $\mu$ m) and a linear gradient from 2 to 60% B (solvent A: water; solvent B: acetonitrile) over 58 min (1% B / min). Using mass data about each fraction from the instrument, only pure fractions were pooled and lyophilized. The purity of the fraction pool was confirmed by LC-MS.

## 2 Analysis and benchmarking of CNN model

### 2.1 Benchmarking against regression models

We benchmarked the fingerprint (FP) representation and convolutional neural network (CNN) model against other model architectures and one-hot representation-based models in their ability to predict activities of both library and Mach sequences (Figs. S2, S3; Tables S2, S3). 8 scikit-learn model architectures (ridge, lasso, stochastic gradient descent, gaussian process, random forest, support vector and gradient boosting regression) and extreme gradient boosting regression were evaluated.<sup>2,3</sup>

Relevant hyperparameters for every model were optimized with Bayesian search using scikit-optimize (Table S1).<sup>4</sup> The hyperparameter optimization was done by 3-fold cross-validation, with the objective function as minimization of average root mean-squared error (RMSE) on the randomly held out validation dataset. The metrics have been reported on the test dataset. The train-valid-test dataset split was 70:10:20.

**Table 1. Hyperparameters and optimized hyperparameters** for regression and classification model architectures, fingerprint and one-hot representations have been noted. The hyperparameters follow a notation – parameter, datatype, values. Datatypes are categorical, integer and real. For categorical datatype, the list of hyperparameters is noted, and for integer and real datatypes, minimum and maximum values are noted.

| Model Architecture | Hyperparameters                                                                                                                                                                                                                                                                                                                                                                                                                             | Optimized parameters                                                                                                                                                                 |                                                                                                                                                                                      |                                                                                                                                                                                  |                                                                                                                                                                                 |
|--------------------|---------------------------------------------------------------------------------------------------------------------------------------------------------------------------------------------------------------------------------------------------------------------------------------------------------------------------------------------------------------------------------------------------------------------------------------------|--------------------------------------------------------------------------------------------------------------------------------------------------------------------------------------|--------------------------------------------------------------------------------------------------------------------------------------------------------------------------------------|----------------------------------------------------------------------------------------------------------------------------------------------------------------------------------|---------------------------------------------------------------------------------------------------------------------------------------------------------------------------------|
|                    |                                                                                                                                                                                                                                                                                                                                                                                                                                             | Regression - Fingerprint                                                                                                                                                             | Regression - One Hot                                                                                                                                                                 | Classification - Fingerprint                                                                                                                                                     | Classification - One Hot                                                                                                                                                        |
| Ridge              | fit_intercept, Categorical, [True, False];<br>normalize, Categorical, [True, False];<br>alpha, Real, [1e-3, 1e3];<br>solver, Categorical, ['svd', 'cholesky', 'lsqr', 'sparse_cg', 'sag', 'saga']                                                                                                                                                                                                                                           | alpha=546.999,<br>fit_intercept=True,<br>normalize=False,<br>solver=sparse_cg                                                                                                        | alpha=41.986,<br>fit_intercept=True,<br>normalize=False,<br>solver=sag                                                                                                               | alpha=118.608,<br>fit_intercept=False,<br>normalize=True,<br>solver=svd                                                                                                          | alpha=96.513,<br>fit_intercept=False,<br>normalize=True,<br>solver=cholesky                                                                                                     |
| Lasso              | fit_intercept, Categorical, [True, False];<br>normalize, Categorical, [True, False];<br>alpha, Real, [1e-3, 1e3];<br>precompute, Categorical, [True, False];<br>selection, Categorical, ['selection', 'random']                                                                                                                                                                                                                             | alpha=0.014,<br>fit_intercept=False,<br>normalize=True,<br>precompute=False,<br>selection=random                                                                                     | alpha=0.007,<br>fit_intercept=True,<br>normalize=False,<br>precompute=True,<br>selection=random                                                                                      | -                                                                                                                                                                                | -                                                                                                                                                                               |
| SGD                | loss, Categorical, ['squared_loss', 'epsilon_insensitive', 'huber', 'squared_epsilon_insensitive'];<br>penalty, Categorical, ['l1', 'l2', 'elasticnet'];<br>alpha, Real, [1e-3, 1e3];<br>fit_intercept, Categorical, [True, False];<br>l1_ratio, Real, [1e-3, 1];<br>learning_rate, Categorical, ['invscaling', 'constant', 'optimal', 'adaptive'];<br>epsilon, Real, [1e-3, 1e3];<br>eta0, Real, [1e-2, 10];<br>power_t, Real, [1e-2, 10]; | alpha=0.002,<br>average=True,<br>epsilon=0.004,<br>eta0=1.738,<br>fit_intercept=True,<br>l1_ratio=0.003,<br>learning_rate=invscaling,<br>loss=huber,<br>penalty=l2,<br>power_t=0.544 | alpha=0.002,<br>average=True,<br>epsilon=0.004,<br>eta0=1.738,<br>fit_intercept=True,<br>l1_ratio=0.003,<br>learning_rate=invscaling,<br>loss=huber,<br>penalty=l2,<br>power_t=0.544 | alpha=0.001,<br>average=True,<br>epsilon=0.077,<br>eta0=0.026,<br>fit_intercept=False,<br>l1_ratio=0.005,<br>learning_rate=optimal,<br>loss=log,<br>penalty=l2,<br>power_t=4.976 | alpha=0.023,<br>average=False,<br>epsilon=0.009,<br>eta0=0.01,<br>fit_intercept=True,<br>l1_ratio=0.1,<br>learning_rate=adaptive,<br>loss=hinge,<br>penalty=l2,<br>power_t=0.01 |



|                   |                                                                                                                                                                                                                                               |                                                                                                             |                                                                                                                 |                                                                                              |                                                                                                 |
|-------------------|-----------------------------------------------------------------------------------------------------------------------------------------------------------------------------------------------------------------------------------------------|-------------------------------------------------------------------------------------------------------------|-----------------------------------------------------------------------------------------------------------------|----------------------------------------------------------------------------------------------|-------------------------------------------------------------------------------------------------|
|                   | average, Categorical, [True, False]                                                                                                                                                                                                           |                                                                                                             |                                                                                                                 |                                                                                              |                                                                                                 |
| Gaussian Process  | kernel, Categorical, [Matern, RBF, DotProduct];<br>alpha, Real, [1e-11, 1e-6];<br>n_restarts_optimizer, Integer, [0, 10]                                                                                                                      | alpha=1.57e-7,<br>kernel=Matern,<br>n_restarts_optimizer=8                                                  | alpha=7.320e-9,<br>kernel=Matern,<br>n_restarts_optimizer=10                                                    | kernel=Matern,<br>n_restarts_optimizer=5                                                     | kernel=Matern,<br>n_restarts_optimizer=5                                                        |
| Random Forest     | criterion, Categorical, ['mse', 'mae']-Regression;<br>criterion, Categorical, ['mse', 'entropy']-Classification<br>n_estimators, Integer, [10, 1000];<br>max_depth, Integer, [1, 10]                                                          | criterion='mse',<br>max_depth=7,<br>n_estimators=626                                                        | criterion='mse',<br>max_depth=6,<br>n_estimators=127                                                            | criterion=entropy,<br>max_depth=8,<br>n_estimators=908                                       | criterion=entropy,<br>max_depth=10,<br>n_estimators=630                                         |
| XGBoost           | gamma, Real, [1e-6, 10];<br>eta, Real, [1e-3, 1];<br>max_depth, Integer, [1, 10];<br>tree_method, Categorical, ['auto', 'exact', 'approx', 'hist'];<br>alpha, Real, [1e-3, 1e3];<br>lambda, Real, [1e-3, 1e3];<br>sketch_eps, Real, [1e-3, 1] | alpha=0.035,<br>eta=0.864,<br>gamma=2.285,<br>reg_lambda=3.945,<br>sketch_eps=0.003,<br>tree_method='exact' | eta=0.864,<br>gamma=2.285,<br>reg_alpha=0.035,<br>reg_lambda=3.945,<br>sketch_eps=0.003,<br>tree_method='exact' | alpha=2.407,<br>eta=0.035,<br>lambda=0.004,<br>max_depth=5,<br>tree_method=exact             | alpha=0.835,<br>eta=0.155,<br>lambda=15.360,<br>max_depth=4,<br>tree_method=auto                |
| Support Vector    | kernel, Categorical, ['linear', 'poly', 'rbf', 'sigmoid'];<br>degree, Integer, [1, 6];<br>gamma, Real, [1e-6, 10];<br>C, Real, [1e-2, 10];<br>epsilon, Real, [1e-3, 10];<br>shrinking, Categorical, [True, False]                             | C=2.671,<br>epsilon=0.009,<br>gamma=0.002,<br>kernel='linear'                                               | C=0.024,<br>epsilon=0.220,<br>gamma=4.966e-5,<br>kernel='linear'                                                | C=0.030,<br>degree=5,<br>gamma=0.011,<br>kernel=linear,<br>shrinking=False                   | C=0.288,<br>degree=5,<br>gamma=0.076,<br>kernel='poly',<br>probability=True,<br>shrinking=False |
| Gradient Boosting | loss, Categorical, ['ls', 'lad', 'huber', 'quantile'];<br>learning_rate, Real, [1e-2, 1];<br>n_estimators, Integer, [10, 1000];<br>criterion, Categorical, ['friedman_mse', 'mse', 'mae'];<br>max_depth, Integer, [1, 10]                     | criterion='mse',<br>learning_rate=0.018,<br>loss='huber',<br>max_depth=6,<br>n_estimators=250               | criterion='mse',<br>learning_rate=0.018,<br>loss='huber',<br>max_depth=6,<br>n_estimators=250                   | criterion=mse,<br>learning_rate=0.018,<br>loss=deviance,<br>max_depth=6,<br>n_estimators=250 | criterion=mse,<br>learning_rate=0.018,<br>loss=deviance,<br>max_depth=6,<br>n_estimators=250    |
| Nearest Neighbors | weights, Categorical, ['uniform', 'distance'];<br>leaf_size, Integer, [10, 100];<br>n_neighbors, Integer, [2, 20];<br>algorithm, Categorical, ['auto', 'ball_tree', 'kd_tree', 'brute'];<br>p, Integer, [1, 5]                                | algorithm=ball_tree,<br>leaf_size=16,<br>n_neighbors=7,<br>p=5,<br>weights=uniform                          | algorithm=brute,<br>leaf_size=56,<br>n_neighbors=4,<br>p=3,<br>weights=uniform                                  | algorithm=auto,<br>leaf_size=57,<br>n_neighbors=4,<br>p=4,<br>weights=uniform                | algorithm=auto,<br>leaf_size=57,<br>n_neighbors=4,<br>p=4,<br>weights=uniform                   |

We evaluated the CNN-fingerprint (CNN-FP) models against individual models and model ensembles trained with FP and one-hot encoding representations.

RMSE and other metrics between the predicted and experimental activity values were used to compare individual models. For the validation dataset, random forest-FP (RF-FP) has lowest RMSE, but RF models cannot extrapolate outside the range of the training data, so they are limited toward the task of designing more active peptides. For the activity values of the Mach sequences, other models such as CNN one-hot had better RMSE,  $R^2$ , Pearson and Spearman's rank correlation coefficients. Based on the RMSE values, the best performing model architecture was one-hot based CNN. In practice, however, we observed that this model was not able to extrapolate activities beyond the training data, whereas the CNN-FP model could. We determined that RMSE and other metrics for the CNN-FP model are significantly affected by outlying predicted activity values. Upon removing the outlier (Mach12 with 140 predicted activity by CNN-FP model), we observed that the CNN-FP model outperforms all other models in terms of RMSE and  $R^2$ .

Unlike CNN-FP, none of the simpler models predict the activity of Mach peptides to be above the maximum of training dataset, as apparent in the parity plot and the RMSE and  $R^2$  metrics for the Mach dataset without the outlier (Table S2). This experiment shows that simpler models are limited by the range of the training data, and are unable to extrapolate in the co-domain space. While other models may be able to produce sequences with high (>20-fold) experimental activity, the ability to extrapolate predicted activities is critical for the informed selection of predicted sequences to validate. Extrapolation is a necessary model feature for our goal of designing sequences with activities higher than those in the training set.

To mitigate the role of outliers that impact performance, we evaluated the use of model ensembling. Ensembled CNN one-hot model performed the best amongst all models on the validation dataset, while ensemble CNN-FP outperformed model-feature combinations on RMSE for Mach dataset, with and without the outlier (Table S3). Although the choice of sequences for experimental validation was not based on predictions from ensemble models, we note that ensemble models can robustly extrapolate predictions outside the training data for future studies.

From our analysis, we observe that simpler models can complement the CNN predictions in decision-making, such as ranking of predicted peptides, as noted from the high Pearson's and Spearman's correlation coefficients. The CNN model is necessary to be able to predict peptides with higher activity than the training set.

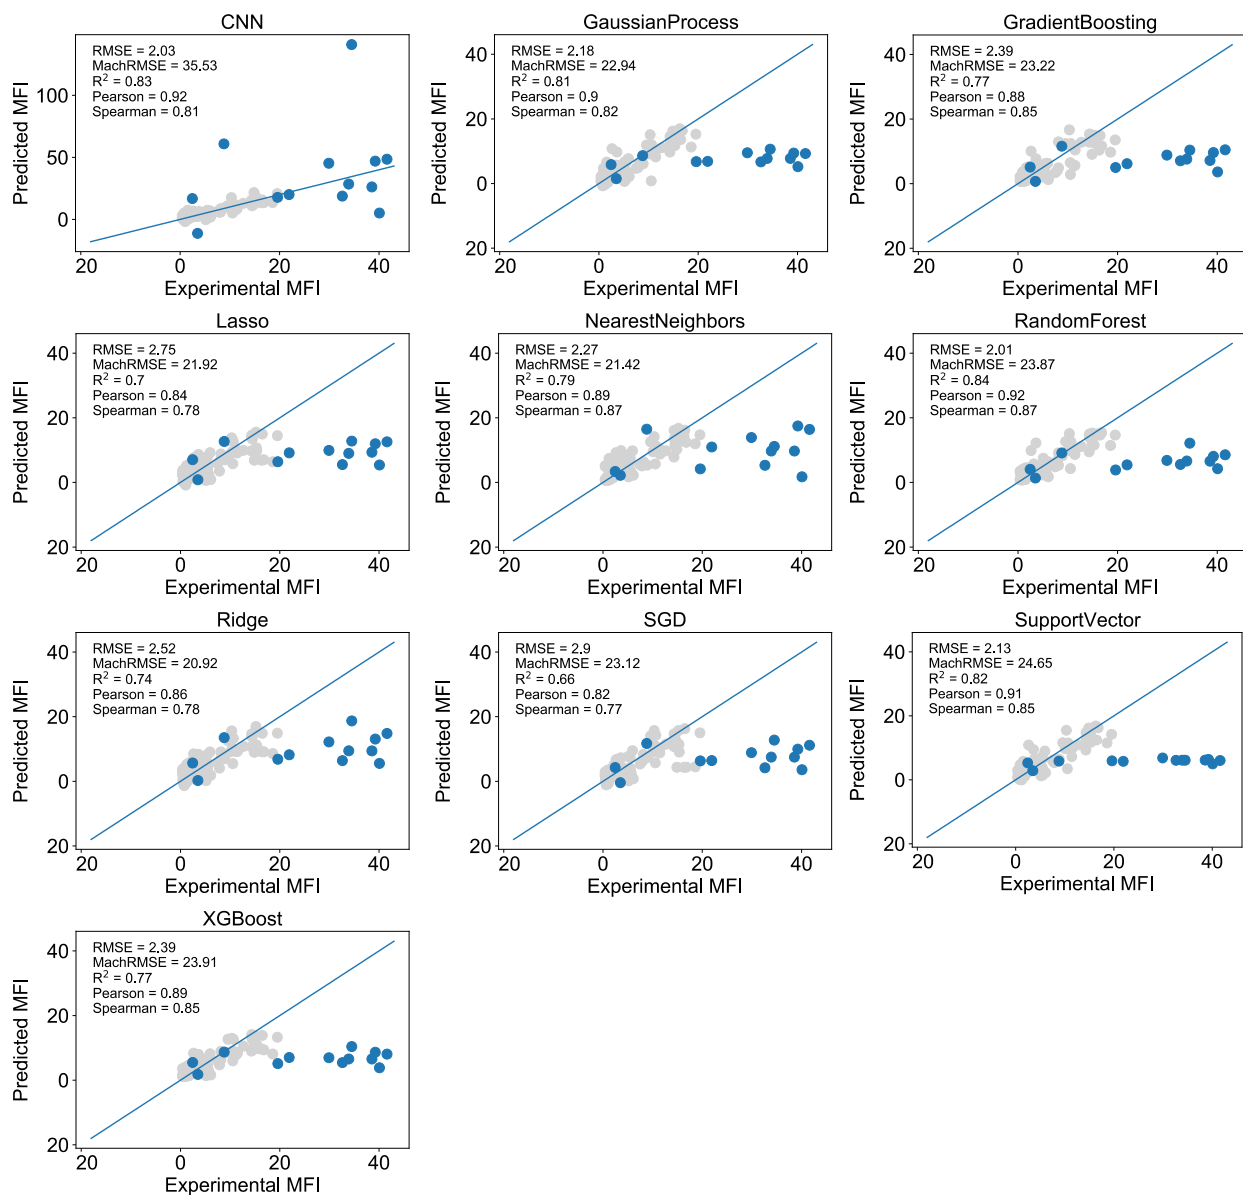

**Figure 2. Parity plots for CNN and other models** trained using 2048-bit fingerprints are shown. Random forest regressor performs best on the validation set, however is unable to extrapolate for Mach peptides. The second best, and the optimal model is support vector regression. The held-out data for validation of the model is shown in grey, and predictions for Mach peptides are shown in blue. Key evaluation metrics have been noted in the data inset. Only the CNN model shows a range of predicted values above the training data, as do the Mach peptides.

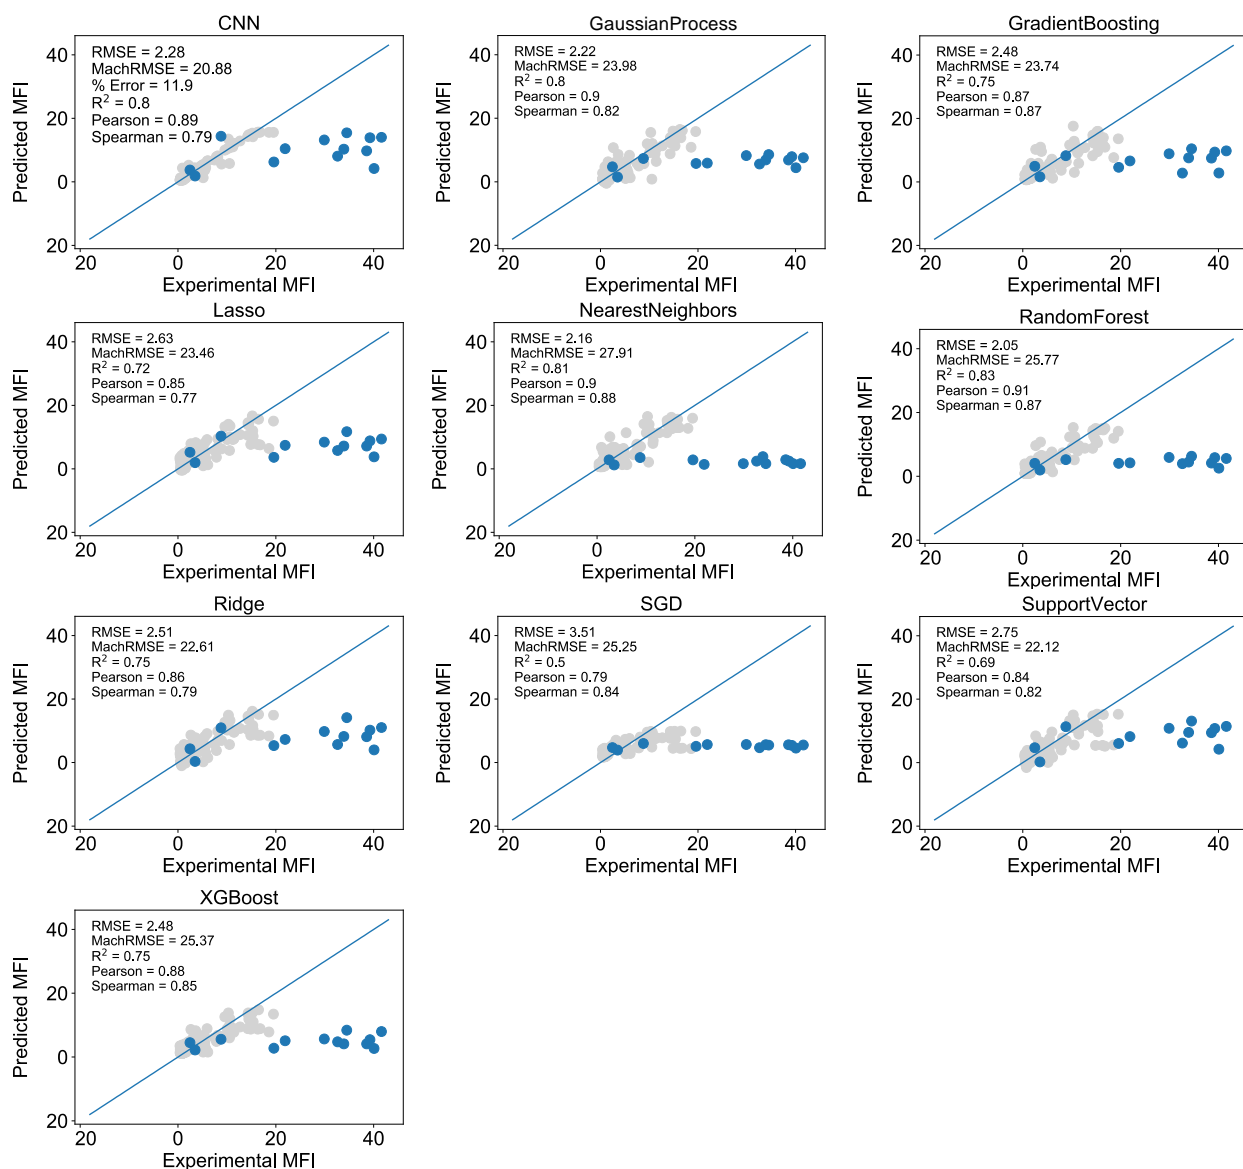

**Figure 3. Parity plots** for CNN and other models trained using one-hot encodings are shown. The held-out data for validation of the model is shown in grey, and predictions for Mach peptides are shown in blue. Key evaluation metrics have been noted in the data inset. Only the CNN model shows a range of predicted values above the training data, as do the Mach peptides.

**Table 2.** The CNN model with 2048-bit fingerprint features (CNN-FP) was tested along with other regression models, trained on fingerprints and one-hot encodings. The best values for each metric have been highlighted in red. The RF model slightly outperforms the original CNN in the validation dataset metrics; however, it is known to be limited in predicting within the range of training data only. As regards testing against the Mach dataset, CNN-Onehot model outperforms the CNN-FP model. However, upon removing the outlier sequence (CNN-FP predicted activity: 140), CNN-FP turns out to be the most optimal model.  $r$  and  $\rho$  refers to Pearson’s and Spearman’s correlation, respectively.

| Model - Feature | Validation |      |         |      |      |        | Mach  |       |       |        | Mach, without outlier |       |       |        |
|-----------------|------------|------|---------|------|------|--------|-------|-------|-------|--------|-----------------------|-------|-------|--------|
|                 | uRMSE      | RMSE | % Error | R2   | $r$  | $\rho$ | RMSE  | R2    | $r$   | $\rho$ | RMSE                  | R2    | $r$   | $\rho$ |
| CNN-FP          | 0.41       | 2.03 | 10.55   | 0.83 | 0.92 | 0.81   | 35.53 | -5.90 | 0.29  | 0.37   | 20.16                 | -1.11 | 0.22  | 0.35   |
| Ridge-FP        | 0.51       | 2.51 | 13.04   | 0.75 | 0.87 | 0.78   | 21.23 | -1.46 | 0.46  | 0.41   | 21.56                 | -1.41 | 0.45  | 0.39   |
| Lasso-FP        | 0.55       | 2.74 | 14.24   | 0.70 | 0.84 | 0.78   | 22.23 | -1.70 | 0.46  | 0.41   | 22.34                 | -1.59 | 0.44  | 0.38   |
| SGD-FP          | 0.61       | 3.03 | 15.76   | 0.63 | 0.80 | 0.81   | 23.28 | -1.96 | 0.42  | 0.35   | 23.33                 | -1.83 | 0.40  | 0.32   |
| GP-FP           | 0.44       | 2.17 | 11.32   | 0.81 | 0.90 | 0.82   | 22.93 | -1.88 | 0.55  | 0.40   | 22.86                 | -1.71 | 0.53  | 0.38   |
| RF-FP           | 0.41       | 2.02 | 10.51   | 0.84 | 0.92 | 0.87   | 23.83 | -2.10 | 0.49  | 0.46   | 23.93                 | -1.97 | 0.50  | 0.45   |
| XGBoost-FP      | 0.47       | 2.34 | 12.19   | 0.78 | 0.88 | 0.82   | 23.68 | -2.07 | 0.49  | 0.47   | 23.81                 | -1.94 | 0.49  | 0.45   |
| SVR-FP          | 0.43       | 2.13 | 11.06   | 0.82 | 0.91 | 0.85   | 24.65 | -2.32 | 0.57  | 0.43   | 24.32                 | -2.07 | 0.56  | 0.44   |
| GB-FP           | 0.48       | 2.37 | 12.33   | 0.77 | 0.88 | 0.86   | 23.19 | -1.94 | 0.44  | 0.33   | 23.11                 | -1.77 | 0.41  | 0.34   |
| kNN-FP          | 0.46       | 2.27 | 11.81   | 0.79 | 0.89 | 0.87   | 21.42 | -1.51 | 0.35  | 0.29   | 21.25                 | -1.34 | 0.34  | 0.28   |
| CNN-Onehot      | 0.46       | 2.28 | 11.90   | 0.80 | 0.89 | 0.79   | 20.88 | -1.38 | 0.47  | 0.38   | 21.02                 | -1.29 | 0.45  | 0.37   |
| Ridge-Onehot    | 0.51       | 2.51 | 13.08   | 0.75 | 0.87 | 0.79   | 22.70 | -1.82 | 0.48  | 0.42   | 22.86                 | -1.71 | 0.46  | 0.41   |
| Lasso-Onehot    | 0.53       | 2.62 | 13.64   | 0.72 | 0.85 | 0.78   | 23.28 | -1.96 | 0.39  | 0.36   | 23.36                 | -1.83 | 0.36  | 0.33   |
| SGD-Onehot      | 0.73       | 3.61 | 18.78   | 0.48 | 0.74 | 0.80   | 25.68 | -2.61 | 0.28  | 0.03   | 25.33                 | -2.33 | 0.27  | 0.05   |
| GP-Onehot       | 0.45       | 2.21 | 11.51   | 0.80 | 0.90 | 0.82   | 24.02 | -2.16 | 0.56  | 0.39   | 23.85                 | -1.95 | 0.54  | 0.38   |
| RF-Onehot       | 0.42       | 2.06 | 10.74   | 0.83 | 0.91 | 0.86   | 25.89 | -2.67 | 0.31  | 0.24   | 25.62                 | -2.41 | 0.28  | 0.22   |
| XGBoost-Onehot  | 0.50       | 2.49 | 12.96   | 0.75 | 0.87 | 0.78   | 25.83 | -2.65 | 0.31  | 0.23   | 25.80                 | -2.46 | 0.27  | 0.21   |
| SVR-Onehot      | 0.55       | 2.74 | 14.26   | 0.70 | 0.84 | 0.82   | 22.12 | -1.68 | 0.51  | 0.40   | 22.18                 | -1.55 | 0.49  | 0.38   |
| GB-Onehot       | 0.50       | 2.49 | 12.97   | 0.75 | 0.87 | 0.87   | 23.54 | -2.03 | 0.45  | 0.41   | 23.55                 | -1.88 | 0.43  | 0.39   |
| kNN-Onehot      | 0.44       | 2.16 | 11.24   | 0.81 | 0.90 | 0.88   | 27.91 | -3.26 | -0.10 | -0.07  | 27.46                 | -2.92 | -0.07 | -0.05  |

Validation loss is defined as unitless root-mean-squared (uRMSE), since the training and validation data are normalized through scaling by the standard deviation of the training data ( $\sigma$ ). Re-scaled RMSE is defined as root-mean-squared error in fold-over-PMO units ( $uRMSE \times \sigma$ ). %Error is defined through the equation below, where range is the difference between the maximum and minimum value in the training data (19.52 and 0.31 respectively) in fold-over-PMO units.

$$\% Error = \frac{uRMSE \times \sigma}{range} \times 100\%$$

**Table 3.** 5 models with distinct random initialization seeds were trained for all possible model-feature combinations (models with ‘\*’ do not have a random state initialization, in the sklearn implementation). In comparison to metrics obtained from individual models (Table S2), we note that both CNN models, based on FP and one-hot encoding respectively, stand out for the ensemble models. CNN one-hot is the optimal model on the validation dataset. CNN-FP outperforms CNN-One-hot and other models, however, on RMSE for Mach dataset and Mach dataset without the outlier.  $r$  and  $\rho$  refers to Pearson’s and Spearman’s correlation, respectively.

| Model - Feature   | Validation |      |         |      |      |        | Mach  |       |       |        | Mach, without outlier |       |       |        |
|-------------------|------------|------|---------|------|------|--------|-------|-------|-------|--------|-----------------------|-------|-------|--------|
|                   | uRMSE      | RMSE | % Error | R2   | r    | $\rho$ | RMSE  | R2    | r     | $\rho$ | RMSE                  | R2    | r     | $\rho$ |
| <b>CNN-FP</b>     | 0.41       | 2.03 | 10.58   | 0.83 | 0.91 | 0.80   | 19.89 | -1.42 | 0.33  | 0.34   | 17.49                 | -0.59 | 0.30  | 0.32   |
| Ridge-FP          | 0.51       | 2.51 | 13.04   | 0.75 | 0.87 | 0.78   | 21.23 | -1.46 | 0.46  | 0.41   | 21.56                 | -1.41 | 0.45  | 0.39   |
| Lasso-FP          | 0.55       | 2.74 | 14.25   | 0.70 | 0.84 | 0.78   | 22.23 | -1.70 | 0.46  | 0.41   | 22.34                 | -1.59 | 0.44  | 0.38   |
| SGD-FP            | 0.61       | 3.01 | 15.64   | 0.64 | 0.80 | 0.79   | 23.36 | -1.98 | 0.47  | 0.40   | 23.34                 | -1.83 | 0.44  | 0.38   |
| GP-FP             | 0.44       | 2.17 | 11.32   | 0.81 | 0.90 | 0.82   | 22.94 | -1.88 | 0.55  | 0.40   | 22.86                 | -1.71 | 0.53  | 0.38   |
| RF-FP             | 0.41       | 2.01 | 10.48   | 0.84 | 0.92 | 0.87   | 23.97 | -2.14 | 0.47  | 0.48   | 24.10                 | -2.02 | 0.49  | 0.47   |
| XGBoost-FP        | 0.47       | 2.34 | 12.19   | 0.78 | 0.88 | 0.82   | 23.68 | -2.07 | 0.49  | 0.47   | 23.81                 | -1.94 | 0.49  | 0.45   |
| SVR-FP*           | 0.43       | 2.13 | 11.06   | 0.82 | 0.91 | 0.85   | 24.65 | -2.32 | 0.57  | 0.43   | 24.32                 | -2.07 | 0.56  | 0.44   |
| GB-FP             | 0.48       | 2.38 | 12.37   | 0.77 | 0.88 | 0.86   | 23.12 | -1.92 | 0.42  | 0.34   | 23.05                 | -1.76 | 0.39  | 0.34   |
| kNN-FP*           | 0.46       | 2.27 | 11.81   | 0.79 | 0.89 | 0.87   | 21.42 | -1.51 | 0.35  | 0.29   | 21.25                 | -1.34 | 0.34  | 0.28   |
| <b>CNN-Onehot</b> | 0.34       | 1.66 | 8.64    | 0.89 | 0.94 | 0.85   | 20.29 | -1.25 | 0.48  | 0.46   | 20.48                 | -1.18 | 0.46  | 0.45   |
| Ridge-Onehot      | 0.61       | 3.03 | 15.77   | 0.63 | 0.82 | 0.83   | 25.13 | -2.45 | 0.39  | 0.20   | 24.84                 | -2.20 | 0.36  | 0.20   |
| Lasso-Onehot      | 0.57       | 2.82 | 14.66   | 0.68 | 0.83 | 0.81   | 23.21 | -1.95 | 0.31  | 0.31   | 23.10                 | -1.77 | 0.27  | 0.28   |
| SGD-Onehot        | 0.73       | 3.60 | 18.75   | 0.48 | 0.74 | 0.80   | 25.52 | -2.56 | 0.29  | 0.01   | 25.17                 | -2.29 | 0.27  | 0.02   |
| GP-Onehot         | 0.45       | 2.21 | 11.51   | 0.80 | 0.90 | 0.82   | 23.87 | -2.12 | 0.55  | 0.39   | 23.72                 | -1.92 | 0.54  | 0.38   |
| RF-Onehot         | 0.41       | 2.01 | 10.48   | 0.84 | 0.92 | 0.87   | 25.75 | -2.63 | 0.33  | 0.29   | 25.50                 | -2.38 | 0.29  | 0.26   |
| XGBoost-Onehot    | 0.50       | 2.49 | 12.96   | 0.75 | 0.87 | 0.78   | 25.83 | -2.65 | 0.31  | 0.23   | 25.80                 | -2.46 | 0.27  | 0.21   |
| SVR-Onehot*       | 0.55       | 2.74 | 14.26   | 0.70 | 0.84 | 0.82   | 22.12 | -1.68 | 0.51  | 0.40   | 22.18                 | -1.55 | 0.49  | 0.38   |
| GB-Onehot         | 0.50       | 2.48 | 12.91   | 0.75 | 0.87 | 0.87   | 23.76 | -2.09 | 0.40  | 0.42   | 23.77                 | -1.93 | 0.37  | 0.40   |
| kNN-Onehot*       | 0.44       | 2.16 | 11.24   | 0.81 | 0.90 | 0.88   | 27.91 | -3.26 | -0.10 | -0.07  | 27.46                 | -2.92 | -0.07 | -0.05  |

## 2.2 Benchmarking against classification models

We benchmarked our regression models with corresponding classification models for both fingerprint and one-hot encoding representations (Tables S4, S5). The classification model architectures are similar to those reported in the literature for CPP prediction.<sup>5-9</sup> Similar to our earlier work, the classes were obtained by setting fold over PMO activity threshold of 3.0, above which the sequences were classified as active, otherwise inactive.<sup>10</sup> The hyperparameter optimization and train-valid-test split was same as the benchmarking of regression models (SI Section 2.1, Table S1). For the CNN models, the architecture was kept largely the same as regression models, with the only modifications being the activation function of last layer as sigmoid and loss function as binary crossentropy, which are conventional modifications for classification model architecture. In addition to conventional metrics for evaluating classification models, we used Spearman’s coefficient to estimate the rank correlation between the predicted probabilities from the classification models and experimental MFI values of the sequences.

The best metrics for the performance of the classification models against the held-out validation and Mach datasets varied across different model architectures. The CNN, support vector, random forest and stochastic gradient descent models were the optimal models across both representations. This benchmarking experiment further confirms that CNN model architecture is optimal at both classification and regression tasks.

**Table 4.** The CNN model with 2048-bit fingerprint features was benchmarked against classification models. Spearman correlation coefficient is calculated using predicted probabilities from the classification model and the experimental MFI values. The best values for each metric have been highlighted in red.

|                          | Validation Dataset Metrics |                |      |        |             |               | Mach Dataset Metrics |                |      |        |             |               |
|--------------------------|----------------------------|----------------|------|--------|-------------|---------------|----------------------|----------------|------|--------|-------------|---------------|
|                          | Accu-<br>racy              | Preci-<br>sion | F1   | Recall | ROC-<br>AUC | Spear-<br>man | Accu-<br>racy        | Preci-<br>sion | F1   | Recall | ROC-<br>AUC | Spear-<br>man |
| <b>CNN-FP</b>            | 0.85                       | 0.81           | 0.85 | 0.92   | 0.92        | 0.81          | 0.46                 | 0.92           | 0.66 | 0.82   | 0.84        | 1.00          |
| <b>Gaussian Process</b>  | 0.84                       | 0.69           | 0.77 | 0.87   | 0.85        | 0.82          | 0.54                 | 0.50           | 0.67 | 1.00   | 0.57        | 0.01          |
| <b>Gradient Boosting</b> | 0.78                       | 0.67           | 0.70 | 0.73   | 0.77        | 0.81          | 0.77                 | 0.83           | 0.87 | 0.91   | 0.45        | 0.21          |
| <b>Nearest Neighbors</b> | 0.88                       | 0.76           | 0.82 | 0.90   | 0.88        | 0.79          | 0.69                 | 0.75           | 0.82 | 0.90   | 0.45        | 0.28          |
| <b>Random Forest</b>     | 0.87                       | 0.82           | 0.82 | 0.83   | 0.86        | 0.85          | 0.77                 | 0.83           | 0.87 | 0.91   | 0.45        | 0.02          |
| <b>Ridge</b>             | 0.90                       | 0.86           | 0.87 | 0.88   | 0.89        | 0.75          | 0.85                 | 0.92           | 0.92 | 0.92   | 0.46        | 0.39          |
| <b>SGD</b>               | 0.89                       | 0.86           | 0.86 | 0.86   | 0.88        | 0.72          | 0.77                 | 0.83           | 0.87 | 0.91   | 0.45        | 0.00          |
| <b>Support Vector</b>    | 0.91                       | 0.88           | 0.88 | 0.88   | 0.90        | 0.75          | 0.77                 | 0.83           | 0.87 | 0.91   | 0.45        | 0.00          |
| <b>XGBoost</b>           | 0.84                       | 0.73           | 0.77 | 0.82   | 0.83        | 0.84          | 0.46                 | 0.50           | 0.63 | 0.86   | 0.43        | 0.22          |



**Table 5.** The CNN model with one-hot representation was benchmarked against classification models. Spearman correlation coefficient is calculated using predicted probabilities from the classification model and the experimental MFI values. ROC-AUC for Mach dataset could not be calculated for nearest neighbors and support vector model architectures as all predicted probabilities were less than 0.50. The best values for each metric have been highlighted in red.

|                          | Validation Dataset Metrics |           |      |        |         |          | Mach Dataset Metrics |           |      |        |         |          |
|--------------------------|----------------------------|-----------|------|--------|---------|----------|----------------------|-----------|------|--------|---------|----------|
|                          | Accuracy                   | Precision | F1   | Recall | ROC-AUC | Spearman | Accuracy             | Precision | F1   | Recall | ROC-AUC | Spearman |
| <b>CNN-One-Hot</b>       | 0.88                       | 0.83      | 0.77 | 0.87   | 0.83    | 0.62     | 0.45                 | 0.91      | 0.58 | 0.82   | 0.87    | 0.62     |
| <b>Gaussian Process</b>  | 0.87                       | 0.73      | 0.81 | 0.90   | 0.88    | 0.83     | 0.77                 | 0.75      | 0.86 | 1.00   | 0.63    | 0.01     |
| <b>Gradient Boosting</b> | 0.86                       | 0.82      | 0.82 | 0.82   | 0.85    | 0.83     | 0.77                 | 0.75      | 0.86 | 1.00   | 0.63    | -0.27    |
| <b>Nearest Neighbors</b> | 0.88                       | 0.80      | 0.84 | 0.89   | 0.88    | 0.82     | 0.08                 | 0.00      | 0.00 | 0.00   | N/A     | 0.27     |
| <b>Random Forest</b>     | 0.90                       | 0.82      | 0.86 | 0.91   | 0.90    | 0.84     | 0.77                 | 0.75      | 0.86 | 1.00   | 0.63    | -0.07    |
| <b>Ridge</b>             | 0.87                       | 0.80      | 0.82 | 0.85   | 0.86    | 0.69     | 0.77                 | 0.83      | 0.87 | 0.91   | 0.45    | 0.00     |
| <b>SGD</b>               | 0.90                       | 0.88      | 0.87 | 0.86   | 0.89    | 0.76     | 0.77                 | 0.83      | 0.87 | 0.91   | 0.45    | 0.00     |
| <b>Support Vector</b>    | 0.84                       | 0.78      | 0.78 | 0.79   | 0.83    | 0.77     | 0.08                 | 0.00      | 0.00 | 0.00   | N/A     | 0.12     |
| <b>XGBoost</b>           | 0.88                       | 0.80      | 0.83 | 0.87   | 0.87    | 0.83     | 0.46                 | 0.42      | 0.59 | 1.00   | 0.56    | 0.09     |

## 2.3 Benchmarking against CPP webservers

We compared our model to currently available CPP prediction tools by evaluating predictions for Mach peptides (accessed on September 3, 2020). (doi: 10.1186/1479-5876-11-74, doi: 10.1186/s12864-017-4128-1, doi: 10.1021/acs.jproteome.7b00019, doi: 10.1021/acs.jproteome.8b00148, doi: 10.1093/bib/bby091) Of note, these prediction tools do not allow for unnatural residues, therefore when testing the Mach sequences, B ( $\beta$ -alanine) and X (aminohexanoic acid) were replaced by A (alanine) and L (leucine) respectively. Macrocyclic peptides were treated as linear peptides. (Table S6).

All the webservers are generic (do not differentiate between different cargo) binary classifiers and provide the classification probability of the sequence being a CPP, and uptake probability. Most webservers, with the exception of CellPPD, classified all Mach peptides, including the negative control Mach11, as CPP. This result indicates that the webservers are not robust enough to differentiate between highly active and poorly active CPPs. The current work of training a quantitative model (regressor) over a standard dataset with consistent cargo and experimentation is necessary to achieve this distinction.

**Table 6. Online webservers** that were accessible (as of September 3, 2020) were used to benchmark the Mach peptides. The row labeled ‘Model’ notes the name of the webserver, and a brief summary has been given in the row ‘Summary’ (format: year of publication - model architecture - sequence size limitation). The unabbreviated forms of the model architectures are – SVM: Support Vector Machine, RF: Random Forest, and ERT: Extremely Randomized Trees. For CPPred-FL (\*), there is no limitation on sequence size, however the prediction is done for a window of 40 residues. Pred denotes prediction, upt denotes uptake and conf denotes confidence.

| Model →    | CellPPD           |           | SkipCPP-Pred    |           | CPPred-RF       |           |      |          | MLCPP                    |           |      |          | CPPred-FL        |           | Current Work     |
|------------|-------------------|-----------|-----------------|-----------|-----------------|-----------|------|----------|--------------------------|-----------|------|----------|------------------|-----------|------------------|
| Summary →  | 2013 - SVM - 1-50 |           | 2017 - RF - >10 |           | 2017 - RF - N/A |           |      |          | 2018 - ERT and RF - 5-30 |           |      |          | 2018 - RF - N/A* |           | 2020 - CNN - N/A |
| Sequence ↓ | Pred              | SVM Score | Pred            | Pred Conf | Pred            | Pred Conf | Upt  | Upt Conf | Pred                     | Pred Conf | Upt  | Upt Conf | Pred             | Pred Conf | Activity         |
| Mach 1     | Non-CPP           | -0.03     | CPP             | 0.93      | CPP             | 0.73      | High | 0.50     | CPP                      | 0.86      | High | 0.51     | CPP              | 0.69      | 29.68            |
| Mach 2     | Non-CPP           | -0.13     | CPP             | 0.81      | CPP             | 0.67      | High | 0.52     | CPP                      | 0.77      | Low  | 0.31     | CPP              | 0.85      | 20.82            |
| Mach 3     | CPP               | 0.43      | CPP             | 0.79      | CPP             | 0.73      | High | 0.52     | CPP                      | 0.85      | Low  | 0.45     | CPP              | 0.69      | 19.52            |
| Mach 4     | CPP               | 0.20      | CPP             | 0.81      | CPP             | 0.79      | High | 0.56     | CPP                      | 0.87      | Low  | 0.39     | CPP              | 0.61      | 18.48            |
| Mach 5     | CPP               | 0.07      | CPP             | 0.71      | CPP             | 0.69      | High | 0.59     | CPP                      | 0.58      | Low  | 0.41     | CPP              | 0.76      | 17.47            |
| Mach 6     | Non-CPP           | -0.03     | CPP             | 0.94      | CPP             | 0.72      | High | 0.53     | CPP                      | 0.86      | Low  | 0.50     | CPP              | 0.82      | 27.25            |
| Mach 7     | Non-CPP           | -0.09     | CPP             | 0.93      | CPP             | 0.73      | High | 0.61     | CPP                      | 0.86      | High | 0.51     | CPP              | 0.77      | 5.30             |
| Mach 8     | Non-CPP           | -0.02     | CPP             | 0.91      | CPP             | 0.68      | High | 0.53     | CPP                      | 0.74      | High | 0.50     | CPP              | 0.78      | 50.55            |
| Mach 9     | CPP               | 0.18      | CPP             | 0.90      | CPP             | 0.78      | High | 0.56     | CPP                      | 0.89      | High | 0.51     | CPP              | 0.85      | 48.90            |
| Mach 10    | Non-CPP           | -0.56     | CPP             | 0.92      | CPP             | 0.61      | High | 0.52     | CPP                      | 0.68      | High | 0.52     | CPP              | 0.67      | 63.43            |
| Mach 11    | Non-CPP           | -0.40     | CPP             | 0.70      | CPP             | 0.56      | High | 0.57     | CPP                      | 0.56      | Low  | 0.35     | CPP              | 0.77      | -11.75           |
| Mach 12    | CPP               | 0.07      | CPP             | 0.90      | CPP             | 0.73      | High | 0.55     | CPP                      | 0.79      | High | 0.52     | CPP              | 0.75      | 140.24           |
| Mach 13    | CPP               | 0.48      | CPP             | 0.84      | CPP             | 0.78      | High | 0.55     | CPP                      | 0.86      | High | 0.62     | CPP              | 0.83      | 44.68            |

## 2.4 Training CNN model on sequences with lower activity (fold over PMO)

In order to determine which factors of the training set are required for accurate prediction, we tested the predictor’s accuracy when trained on datasets with increasing activity. We trained CNN models with the same architecture as the optimized model, with activity thresholds increasing by 0.5, starting at 0.5 until 19 (Fig. S4, Table S7). Trained models are able to extrapolate activities beyond the training data only once the training data reaches activity around 8-fold over PMO. The performance then continues to increase with subsequently increasing activity thresholds. RMSE for held out test dataset consisting of sequences having higher activity than threshold increases at first, and then decreases, indicating a barrier for learning. RMSE for Mach sequences continues to decrease as the number of training data points and threshold increases, indicating that extrapolation for high activity sequences (such as Mach sequences) requires a wide range of training data. Including even higher activity sequences in future rounds of model training would potentially lead to more accurate predictions in future work. The experiment notes that activity has a sequence dependence that the model is able to learn, once meeting an activity threshold in the training data.

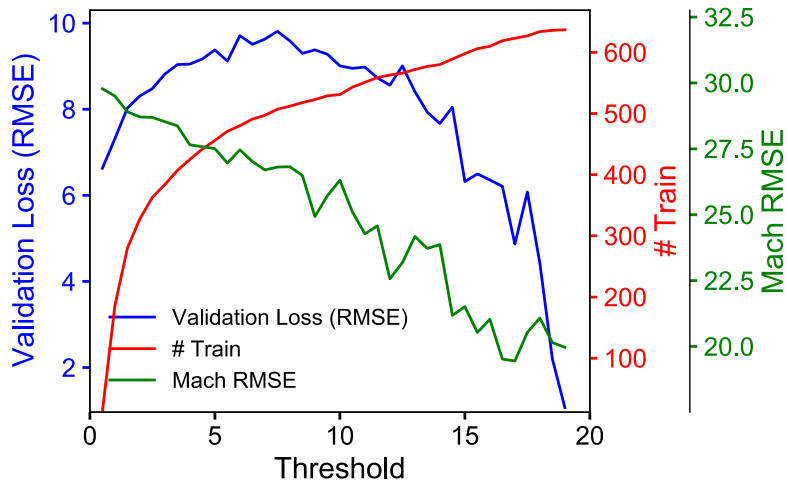

**Figure 4. Threshold for extrapolation.** The validation loss (RMSE), in blue, for the held-out dataset of sequences having higher activity than the ones used for training the model goes through a barrier. RMSE for Mach sequences, in green, is decreasing with increasing threshold. The number of training datapoints is indicated in red.

**Table 7.** The evaluation metrics for models trained with sequences filtered by activity threshold have been noted. The original CNN model has been highlighted in grey color.

| Threshold     | #Train | #Test | uRMSE | RMSE | MachRMSE | % Error | R <sup>2</sup> | Pearson |
|---------------|--------|-------|-------|------|----------|---------|----------------|---------|
| 0.5           | 13     | 627   | 1.34  | 6.63 | 29.78    | 34.53   | -0.79          | -0.08   |
| 1             | 186    | 454   | 1.48  | 7.32 | 29.5     | 38.08   | -1             | -0.09   |
| 1.5           | 280    | 360   | 1.62  | 8.03 | 28.91    | 41.82   | -1.43          | -0.33   |
| 2             | 328    | 312   | 1.68  | 8.31 | 28.71    | 43.28   | -1.72          | 0.03    |
| 2.5           | 363    | 277   | 1.71  | 8.48 | 28.69    | 44.14   | -1.98          | -0.04   |
| 3             | 384    | 256   | 1.78  | 8.82 | 28.53    | 45.91   | -2.38          | -0.26   |
| 3.5           | 407    | 233   | 1.83  | 9.04 | 28.37    | 47.08   | -2.8           | -0.19   |
| 4             | 425    | 215   | 1.83  | 9.05 | 27.65    | 47.11   | -3.07          | -0.08   |
| 4.5           | 442    | 198   | 1.85  | 9.17 | 27.58    | 47.73   | -3.53          | 0.02    |
| 5             | 456    | 184   | 1.9   | 9.38 | 27.51    | 48.84   | -4.16          | -0.03   |
| 5.5           | 471    | 169   | 1.84  | 9.12 | 26.96    | 47.48   | -4.46          | 0.11    |
| 6             | 480    | 160   | 1.96  | 9.71 | 27.46    | 50.56   | -5.72          | 0.04    |
| 6.5           | 491    | 149   | 1.92  | 9.51 | 27.02    | 49.49   | -6.29          | -0.04   |
| 7             | 497    | 143   | 1.95  | 9.63 | 26.7     | 50.15   | -7.08          | 0.1     |
| 7.5           | 507    | 133   | 1.98  | 9.81 | 26.81    | 51.05   | -8.61          | -0.07   |
| 8             | 512    | 128   | 1.94  | 9.59 | 26.82    | 49.95   | -8.99          | -0.04   |
| 8.5           | 518    | 122   | 1.88  | 9.3  | 26.49    | 48.43   | -9.34          | 0.11    |
| 9             | 523    | 117   | 1.9   | 9.38 | 24.93    | 48.85   | -10.38         | 0.14    |
| 9.5           | 529    | 111   | 1.88  | 9.28 | 25.72    | 48.32   | -11.27         | 0.12    |
| 10            | 531    | 109   | 1.82  | 9.01 | 26.31    | 46.92   | -10.92         | 0.14    |
| 10.5          | 543    | 97    | 1.81  | 8.95 | 25.11    | 46.6    | -13.17         | 0.22    |
| 11            | 551    | 89    | 1.82  | 8.98 | 24.27    | 46.73   | -16            | 0.17    |
| 11.5          | 559    | 81    | 1.76  | 8.73 | 24.58    | 45.42   | -19            | 0.11    |
| 12            | 563    | 77    | 1.73  | 8.56 | 22.57    | 44.57   | -21.05         | 0.13    |
| 12.5          | 566    | 74    | 1.82  | 9.01 | 23.18    | 46.9    | -25.47         | 0       |
| 13            | 572    | 68    | 1.7   | 8.41 | 24.17    | 43.78   | -26.83         | 0.03    |
| 13.5          | 577    | 63    | 1.6   | 7.93 | 23.72    | 41.26   | -27.35         | 0.23    |
| 14            | 580    | 60    | 1.55  | 7.67 | 23.87    | 39.92   | -27.54         | 0.27    |
| 14.5          | 589    | 51    | 1.63  | 8.05 | 21.18    | 41.92   | -36.2          | 0.24    |
| 15            | 598    | 42    | 1.28  | 6.32 | 21.51    | 32.89   | -27.91         | 0.26    |
| 15.5          | 606    | 34    | 1.31  | 6.5  | 20.53    | 33.83   | -38.67         | 0.27    |
| 16            | 610    | 30    | 1.29  | 6.36 | 21.03    | 33.11   | -41.49         | 0.32    |
| 16.5          | 619    | 21    | 1.26  | 6.21 | 19.52    | 32.33   | -57.81         | -0.04   |
| 17            | 623    | 17    | 0.99  | 4.87 | 19.45    | 25.38   | -45.61         | 0.65    |
| 17.5          | 627    | 13    | 1.23  | 6.08 | 20.53    | 31.66   | -76.13         | 0.59    |
| 18            | 634    | 6     | 0.89  | 4.42 | 21.08    | 23.03   | -75.21         | 0.66    |
| 18.5          | 636    | 4     | 0.45  | 2.2  | 20.15    | 11.47   | -39.37         | 0.88    |
| 19            | 637    | 3     | 0.22  | 1.07 | 19.97    | 5.57    | -44.72         | -0.99   |
| <b>CNN-FP</b> | 512*   | 128*  | 0.41  | 2.03 | 10.55    | 35.53   | 0.83           | 0.92    |

## 2.5 Training CNN model on sequences by leaving one residue/linker out

In order to demonstrate the advantage of the fingerprint representations in giving the model flexibility in predictions, we trained CNN models by leaving one residue out then having it predict activity of all sequences (Table S8). Models trained with sequences leaving one residue/linker out are able to compensate for the missing residue to a certain extent. Models were trained with sequences without a particular residue/linker and evaluated against the test dataset with sequences containing the residue/linker. This demonstrates that the model is able to infer chemical rules, such as the similarities between glutamic acid and glutamine, and aspartic acid and asparagine. It is hypothesized that the performance in some cases may be marred by a lack of sufficient training data points for the maximum similarity residue. The absence of similar sequence motifs, in the case of replacement by maximum similarity residue, may also be a contributing factor in the performance of the models. These results suggest that the model is able to use information learned from other amino acids.

**Table 8.** The evaluation metrics for models trained with sequences without a particular residue/linker have been noted, in decreasing order of RMSE. The residue/linker in the dataset with maximum chemical similarity, evaluated using Tanimoto similarity over the fingerprints, has been noted in the column Chem. Simil.

| Residue/<br>Linker | Chem.<br>Simil. | #Train | #Test | uRMSE       | RMSE        | Mach<br>RMSE | % Error | R <sup>2</sup> | Pearson     |
|--------------------|-----------------|--------|-------|-------------|-------------|--------------|---------|----------------|-------------|
| I                  | V, 0.70         | 114    | 526   | 1.41        | 6.95        | 20.79        | 36.17   | -2             | 0.3         |
| E                  | Q, 0.66         | 456    | 184   | 1.39        | 6.86        | 24.49        | 35.68   | -0.35          | 0.54        |
| A                  | S, 0.76         | 150    | 490   | 1.24        | 6.14        | 17.93        | 31.95   | -0.99          | 0.42        |
| R                  | Q, 0.51         | 12     | 628   | 1.16        | 5.76        | 28.62        | 29.96   | -0.34          | -0.12       |
| L                  | I, 0.63         | 74     | 566   | 1.14        | 5.66        | 22.77        | 29.44   | -0.23          | 0.12        |
| K                  | L, 0.62         | 25     | 615   | 1.14        | 5.64        | 19.86        | 29.35   | -0.26          | 0.24        |
| Q                  | E, 0.66         | 221    | 419   | 1.14        | 5.64        | 21.74        | 29.34   | -1.19          | 0.31        |
| S                  | A, 0.76         | 186    | 454   | 1.1         | 5.44        | 27.79        | 28.32   | -0.09          | 0.18        |
| G                  | A, 0.62         | 172    | 468   | 1.1         | 5.42        | 25.35        | 28.21   | -0.02          | 0.39        |
| P                  | Q, 0.47         | 143    | 497   | 1.07        | 5.29        | 24.8         | 27.52   | -0.09          | 0.28        |
| H                  | F, 0.27         | 402    | 238   | 1.05        | 5.2         | 22.31        | 27.07   | -1.2           | 0.18        |
| 3                  | W, 0.18         | 64     | 576   | 1.05        | 5.17        | 27.17        | 26.91   | -0.01          | 0.33        |
| V                  | I, 0.70         | 44     | 596   | 0.99        | 4.88        | 25.93        | 25.42   | 0.08           | 0.56        |
| 2                  | C, 0.55         | 64     | 576   | 0.97        | 4.79        | 26.96        | 24.94   | 0.13           | 0.44        |
| B                  | A, 0.55         | 592    | 48    | 0.92        | 4.57        | 24.62        | 23.8    | 0.55           | 0.87        |
| X                  | K, 0.61         | 592    | 48    | 0.89        | 4.4         | 25.02        | 22.92   | 0.59           | 0.87        |
| Y                  | F, 0.82         | 387    | 253   | 0.83        | 4.13        | 18.74        | 21.48   | 0.15           | 0.5         |
| N                  | D, 0.54         | 267    | 373   | 0.79        | 3.91        | 21.33        | 20.37   | 0.09           | 0.38        |
| C                  | 2, 0.55         | 495    | 145   | 0.7         | 3.47        | 22.95        | 18.07   | 0.63           | 0.8         |
| F                  | Y, 0.82         | 245    | 395   | 0.67        | 3.31        | 25.38        | 17.23   | 0.36           | 0.62        |
| W                  | F, 0.35         | 323    | 317   | 0.65        | 3.23        | 22.65        | 16.81   | 0.36           | 0.66        |
| M                  | V, 0.48         | 445    | 195   | 0.63        | 3.14        | 24.05        | 16.34   | 0.27           | 0.55        |
| T                  | S, 0.57         | 343    | 297   | 0.62        | 3.07        | 22.13        | 15.99   | 0.46           | 0.7         |
| D                  | N, 0.54         | 399    | 241   | 0.6         | 2.96        | 22.58        | 15.42   | 0.42           | 0.71        |
| <b>CNN-FP</b>      | -               | 512*   | 128*  | <b>0.41</b> | <b>2.03</b> | <b>10.55</b> | 35.53   | <b>0.83</b>    | <b>0.92</b> |

### 3 Analysis of the role of generator

In order to investigate the role and advantages of generator, we conducted five *in silico* experiments comparing the generator to other methods of generating seed sequences (Fig. S5, Table S9). The predictor-optimizer loop was seeded with 50 sequences sampled from random sequences from the predictor training dataset (CPP Library), the 50 most active sequences from the predictor training dataset (CPP Library Top50), the CPP thesaurus (CPPsite 2.0), randomly generated sequences with equal likelihood for all amino acids at all sites, and sequences sampled using the generator as reported in the main text.

Our three criteria for optimized sequences are: high predicted activity, low similarity, and low Arg content. The optimized sequences have varying ranges of these characteristics. The top 50 sequences from the predictor dataset receive a head start in terms of activity, resulting in the highest predicted activity, followed by the generator-sampled, CPP library, and CPP thesaurus and random sequences. On the other hand, the maximum and mean similarities for sequences optimized using the seeds from the Top50 and full CPP Library are higher than for the sequences optimized using generator-sampled, CPP thesaurus, and randomly generated seeds. Finally, the generator-sampled, CPP thesaurus, and random sequences resulted in optimized sequences with lower Arg content than sequences from Top50 and full CPP library. Taken together, sampling seeds from the generator is a more favorable option for meeting our three criteria. However, we note that with appropriate diversity constraints and predicted activity thresholds, it is possible to sample sequences using other routes and still predict sequences with the desired characteristics. We note that this comparison uses predicted activity, and robust comparison of these strategies would require experimental validation.

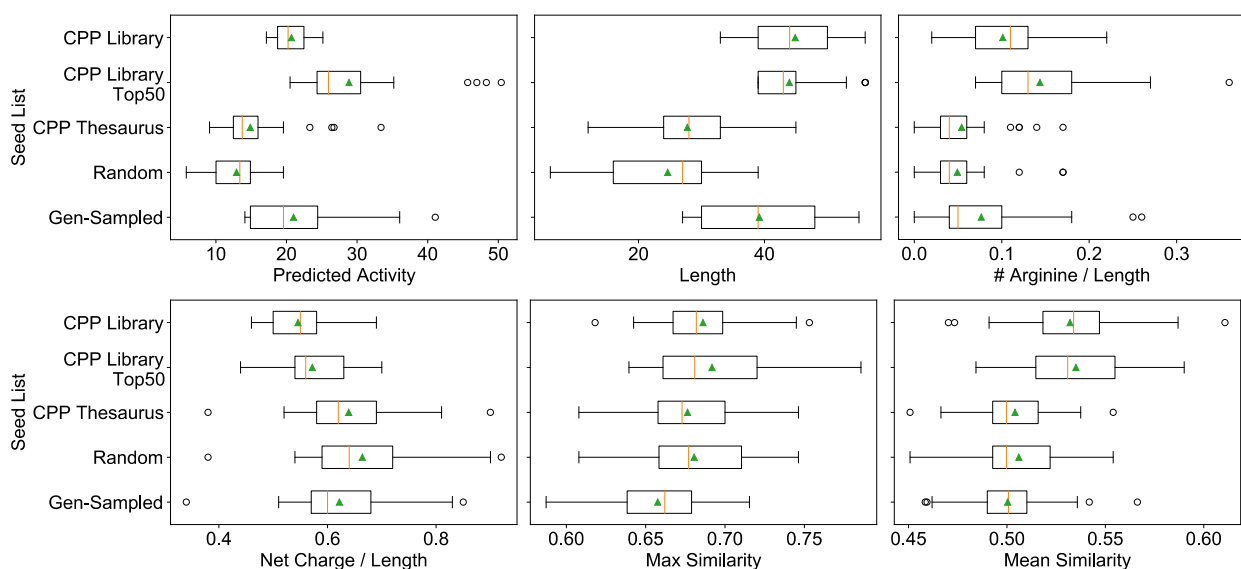

**Figure 5. Box plots** comparing optimized sequences comparing random seeds, randomly selected sequences from the predictor dataset, and seed sequences sampled from the generator dataset. For the box plot, the box marks the interquartile range (IQR), Q1 and Q3; the whiskers are at  $Q1-1.5*IQR$  and  $Q3+1.5*IQR$ ; the orange line is the median; the green triangle is the mean, and outliers, if outside the whiskers, are marked as dots,  $N = 50$  sequences.

**Table 9.** Statistical metrics comparing optimization of seed sequences sampled from different lists.

| Statistic | Seed List          | Predicted Activity | Length | # Arginine/<br>Length | Net Charge/<br>Length | Maximum Similarity | Mean Similarity |
|-----------|--------------------|--------------------|--------|-----------------------|-----------------------|--------------------|-----------------|
| Mean      | CPP Library        | 20.70              | 44.88  | 0.10                  | 0.55                  | 0.69               | 0.53            |
|           | CPP Library Top 50 | 28.86              | 43.95  | 0.14                  | 0.57                  | 0.69               | 0.54            |
|           | CPP Thesaurus      | 14.87              | 27.76  | 0.05                  | 0.64                  | 0.68               | 0.50            |
|           | Random             | 12.92              | 24.63  | 0.05                  | 0.66                  | 0.68               | 0.51            |
|           | Gen-Sampled        | 21.00              | 39.2   | 0.08                  | 0.62                  | 0.66               | 0.50            |
| Median    | CPP Library        | 20.23              | 44     | 0.11                  | 0.55                  | 0.68               | 0.53            |
|           | CPP Library Top 50 | 25.94              | 43     | 0.13                  | 0.56                  | 0.68               | 0.53            |
|           | CPP Thesaurus      | 13.74              | 28     | 0.04                  | 0.62                  | 0.67               | 0.50            |
|           | Random             | 13.40              | 27     | 0.04                  | 0.64                  | 0.68               | 0.50            |
|           | Gen-Sampled        | 19.58              | 39     | 0.05                  | 0.60                  | 0.66               | 0.50            |
| Minimum   | CPP Library        | 17.16              | 33     | 0.02                  | 0.46                  | 0.62               | 0.47            |
|           | CPP Library Top 50 | 20.51              | 39     | 0.07                  | 0.44                  | 0.64               | 0.48            |
|           | CPP Thesaurus      | 9.11               | 12     | 0.00                  | 0.38                  | 0.61               | 0.45            |
|           | Random             | 5.81               | 6      | 0.00                  | 0.38                  | 0.61               | 0.45            |
|           | Gen-Sampled        | 14.12              | 27     | 0.00                  | 0.34                  | 0.59               | 0.46            |
| Maximum   | CPP Library        | 25.15              | 56     | 0.22                  | 0.69                  | 0.75               | 0.61            |
|           | CPP Library Top 50 | 50.42              | 56     | 0.36                  | 0.70                  | 0.79               | 0.59            |
|           | CPP Thesaurus      | 33.40              | 45     | 0.17                  | 0.90                  | 0.75               | 0.55            |
|           | Random             | 19.57              | 39     | 0.17                  | 0.92                  | 0.75               | 0.55            |
|           | Gen-Sampled        | 41.07              | 55     | 0.26                  | 0.85                  | 0.72               | 0.57            |
| Q1        | CPP Library        | 18.74              | 39     | 0.07                  | 0.50                  | 0.67               | 0.52            |
|           | CPP Library Top 50 | 24.34              | 39     | 0.10                  | 0.54                  | 0.66               | 0.51            |
|           | CPP Thesaurus      | 12.47              | 24     | 0.03                  | 0.58                  | 0.66               | 0.49            |
|           | Random             | 10.01              | 16     | 0.03                  | 0.59                  | 0.66               | 0.49            |
|           | Gen-Sampled        | 14.89              | 30     | 0.04                  | 0.57                  | 0.64               | 0.49            |
| Q3        | CPP Library        | 22.47              | 50     | 0.13                  | 0.58                  | 0.70               | 0.55            |
|           | CPP Library Top 50 | 30.51              | 45     | 0.18                  | 0.63                  | 0.72               | 0.55            |
|           | CPP Thesaurus      | 15.98              | 33     | 0.06                  | 0.69                  | 0.70               | 0.52            |
|           | Random             | 14.89              | 30     | 0.06                  | 0.72                  | 0.71               | 0.52            |
|           | Gen-Sampled        | 24.42              | 48     | 0.1                   | 0.68                  | 0.68               | 0.51            |

## 4 Analysis of the optimization approach

### 4.1 Analyzing the role of constraints in the optimizer

We tested the model with varying combinations of constraints to probe the role of each constraint in sequence optimization (Table S10). 5 seed sequences with variable length (10, 20, 30, 40, 50) were used to seed the predictor-optimizer loop, where the optimizer had none to all constraints – maximization of predicted activity, minimization of similarity, minimization of Arg content, minimization of length, and maintenance of net charge for water solubility. Removal of a constraint leads to clear change in the optimized sequences. For instance, when minimization of Arg content is not a constraint, the sequences have a high degree of net Arg. Such sequences have been shown to be toxic in vivo and are already a known cell-penetrating motif. A goal of this work was to generate unique high-activity sequences that do not rely on Arg for activity.

The constraints are also necessary to shift away from the bias in the training dataset, since without them, the predicted sequences would appear to be very similar to the sequences in the training dataset. This dataset was created using a combinatorial approach with the currently known cell-penetrating peptides. The peptides in the training dataset inherently have a net high Arg content and longer length than desired. The optimizer also makes mutations to the seed sequences using motifs from the training data, so without minimizing similarity, the end sequences would resemble the training sequences. The constraints help to reduce the bias present in the dataset, and optimize sequences towards desired properties and away from those in the training dataset such that we are more likely to discover new sequences and motifs.

**Table 10.** List of top sequences obtained from the optimization without additional constraints.

| Constraints | Sequences                                             | Intensity | Length | Relative Arg | Relative Charge |
|-------------|-------------------------------------------------------|-----------|--------|--------------|-----------------|
| Seeds       | KHAPRESSW                                             | 2.50      | 10.00  | 0.20         | 0.28            |
|             | RWTAWTLRRIAKAVGPIVRR                                  | 2.71      | 20.00  | 0.25         | 0.30            |
|             | SCRRPQRKDVLTIHRNRIRGAHARPNR                           | 4.60      | 30.00  | 0.30         | 0.35            |
|             | GKEKQSWRRFQRKTPRSAAQMRRAKRALARARLQ<br>LSRSQRR         | 3.89      | 40.00  | 0.28         | 0.35            |
|             | RSSHHCARSPRLRRHKRRKPIKVRLRRRMKLELK<br>KTARKRKSRRRGLHC | 2.78      | 50.00  | 0.32         | 0.52            |
| MFI         | RRRRRQRRRRR                                           | 11.53     | 12.00  | 0.92         | 0.92            |
|             | RKRRRQRKRRRRWPXRIPQYDQXF                              | 14.40     | 25.00  | 0.40         | 0.44            |
|             | KKKRPQLKRRRRGPMRXCSEDFHFPRPTK                         | 14.45     | 30.00  | 0.23         | 0.36            |
|             | GKKRRSRRRRRGPKGGVPQSQGYPKYSBNRXR<br>RRRRX             | 28.31     | 39.00  | 0.36         | 0.46            |
|             | RRRRLLKRRRRKGKXLPKFREGYPLGLKPRKRR<br>QRRRYRWGRGKHRTWW | 26.90     | 51.00  | 0.37         | 0.53            |
| MFI, Length | RRRRRQRRRRR                                           | 11.53     | 12.00  | 0.92         | 0.92            |
|             | RRRRRQGKRRRRGPRGKVPEPPQHSPKY                          | 15.53     | 28.00  | 0.36         | 0.46            |
|             | RKRRRQRKRRRRGPMGKRSPSQGYALYLK                         | 16.03     | 30.00  | 0.33         | 0.50            |



|                             |                                                           |       |       |      |      |
|-----------------------------|-----------------------------------------------------------|-------|-------|------|------|
|                             | BKKKNSBBKRRRWGKNAPQPKAKYPLWILRRR<br>RRQRGRYRR             | 21.28 | 42.00 | 0.31 | 0.48 |
|                             | XRRRLLRRLRRNPGRGLRVIFGRKRGAAANRXRR<br>MRXRGPWARKRHXRW     | 33.74 | 50.00 | 0.42 | 0.48 |
| MFI, Arg                    | RRRRRQRRRRRWPMG                                           | 12.50 | 16.00 | 0.69 | 0.69 |
|                             | RRRRRQKRRRRWCKKGIPE                                       | 13.14 | 20.00 | 0.50 | 0.60 |
|                             | RRKRPQERRRRGLNRXCSEPPQHAYIYCK                             | 14.16 | 30.00 | 0.30 | 0.32 |
|                             | GKRKKSBLKRRALKXRRBKAKAGQRQYALKRXR<br>RQRXRLPRWR           | 25.83 | 44.00 | 0.30 | 0.50 |
|                             | RRNRRENKRRRRGLBMALPRPAEGYLLRLINKRRL<br>QRRRGPWARXRKXRW    | 32.84 | 50.00 | 0.36 | 0.38 |
| MFI, Charge                 | RRRRRQRRRRR                                               | 11.53 | 12.00 | 0.92 | 0.92 |
|                             | RRRRRQKRRRRGPMGXCPRP                                      | 14.19 | 21.00 | 0.52 | 0.57 |
|                             | RRRRRQRRRRRGPGGGNPRPEQHVPDFLBG                            | 16.10 | 31.00 | 0.39 | 0.35 |
|                             | GKKRRQRRRRRGPNNKNPQFSQKYPQPPRXKR<br>RRRRR                 | 24.81 | 39.00 | 0.41 | 0.54 |
|                             | RRLRLRLRRRRYLRGKLLQKVKYKQGLRBRRRR<br>QRXRAPKPRRRRKRWCR    | 38.53 | 53.00 | 0.45 | 0.58 |
| MFI, Length,<br>Arg         | RRKRRQ                                                    | 6.66  | 6.00  | 0.67 | 0.83 |
|                             | RRKRRQKRRRRGPKKGV PQ                                      | 14.32 | 20.00 | 0.45 | 0.65 |
|                             | RRRRRQRPKRRRGPLRGCPQFRQHFLQYL                             | 15.43 | 29.00 | 0.34 | 0.44 |
|                             | BRRRQKRRRRYRBKGIQPREKYLQYLIRXXKR<br>QRXRRR                | 26.89 | 42.00 | 0.43 | 0.50 |
|                             | RRGRRLKLRWRGRRRAKPRLGYPYADRRRR<br>RERRRRYWRQKHXRW         | 29.25 | 50.00 | 0.52 | 0.56 |
| MFI, Arg,<br>Charge         | RRRRRQRRRRRWP                                             | 12.32 | 14.00 | 0.79 | 0.79 |
|                             | BKKRRQRRRRNRWRGKNCPQPSLSYAMY                              | 14.31 | 28.00 | 0.29 | 0.39 |
|                             | WRKRPQRKRRRRWPKADQPAQBVAQPLBGR<br>X                       | 17.67 | 33.00 | 0.24 | 0.33 |
|                             | GRKKRQLKRRRGPMRGKQPSSKYPRYSKXRR<br>LQRRX                  | 23.06 | 39.00 | 0.31 | 0.49 |
|                             | RRRRRLRRRRRPGNALARADQDYLAYVLRGR<br>RRRXACBCRXLHW          | 26.00 | 48.00 | 0.42 | 0.39 |
| MFI, Length,<br>Charge      | RRRRRQRRRRR                                               | 11.53 | 12.00 | 0.92 | 0.92 |
|                             | RRRRRQEKLRRRGPNKGIPQPSQHYPYLLG                            | 16.94 | 31.00 | 0.26 | 0.32 |
|                             | RRRRRQKRRRRGPLGGGLQFKEGVPQYVQNRX                          | 18.48 | 33.00 | 0.30 | 0.36 |
|                             | RKRRKSRRRRRRPNGGRSQPEQXYLLPTBXRRR<br>RRKXXRRRW            | 27.35 | 43.00 | 0.44 | 0.49 |
|                             | RRRRKALKLLRYPKKINLQPREKQPQWLAKRRR<br>RRXRRRWRXRRWRWXCGRXM | 53.09 | 56.00 | 0.38 | 0.48 |
| MFI, Length,<br>Arg, Charge | HRKRRQ                                                    | 6.70  | 6.00  | 0.50 | 0.80 |
|                             | RRRRRQKRRRRRWGGVPRPSQBQPV                                 | 14.73 | 27.00 | 0.44 | 0.48 |
|                             | RRKRRQRRRRRGGKBGPIQXVPQYLIRXXRR<br>BR                     | 20.80 | 37.00 | 0.38 | 0.43 |
|                             | KKRRKQAKRRRRNPKNPQFDFHFRPTLXRGR<br>RKGRX                  | 23.29 | 39.00 | 0.26 | 0.46 |

|  |                                                        |       |       |      |      |
|--|--------------------------------------------------------|-------|-------|------|------|
|  | RRLRRSGLKSRRLGKSSQPSKGRRLPSKRGKLL<br>KGXGLWGRGKRXTWWCM | 30.39 | 53.00 | 0.21 | 0.36 |
|--|--------------------------------------------------------|-------|-------|------|------|

## 4.2 Optimizing for sequences with all canonical residues

We determined that sequences with comparable activity could not be achieved using only canonical residues. We optimized peptides containing only canonical residues by constraining the optimizer to use only canonical residues for mutations (Fig. S6, Table S11). 50 seed sequences sampled from generator were used to seed the predictor-optimizer loop. While we can predict fully canonical peptides, the predicted activities of these peptides are significantly lower than those containing noncanonical residues. Given the constraints in the optimizer (minimization of length and Arg content), we observe diminishing returns of length versus Arg content, where shorter sequences have more Arg in order to have a high predicted MFI.

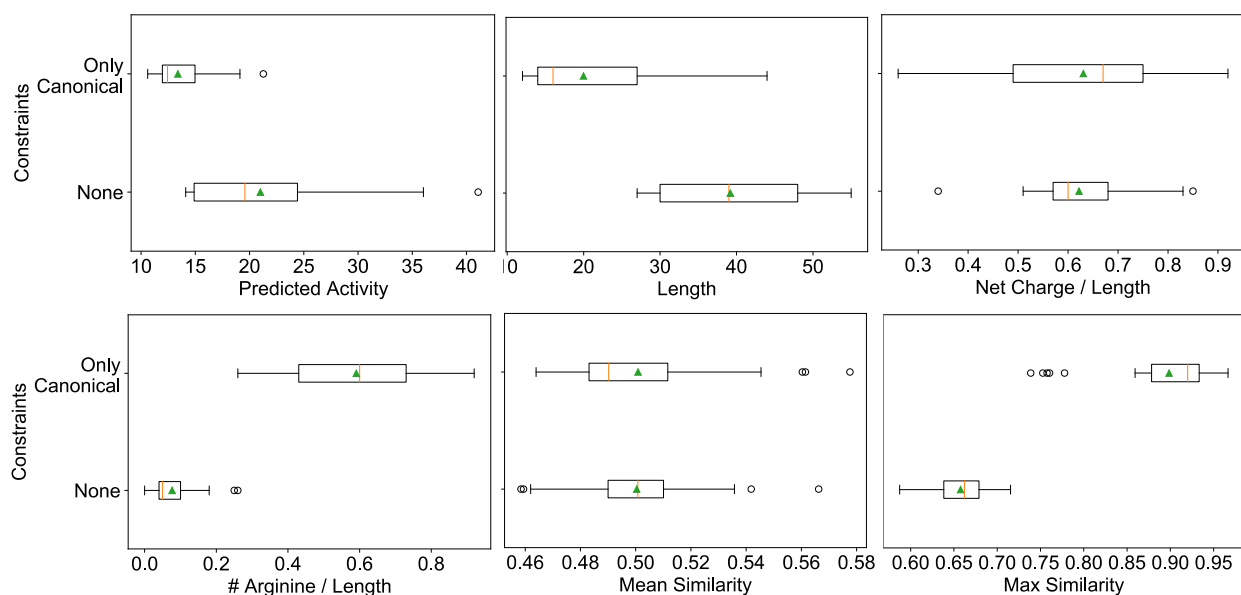

**Figure 6. Box plots** comparing optimized sequences with and without the constraint of only being able to use canonical residues for the genetic algorithm mutations. For the box plot, the box marks the interquartile range (IQR), Q1 and Q3; the whiskers are at  $Q1-1.5*IQR$  and  $Q3+1.5*IQR$ ; the orange line is the median; the green triangle is the mean, and outliers, if outside the whiskers, are marked as dots,  $N = 50$  sequences.

**Table 11.** Optimized sequences in decreasing order of predicted MFI.

| Sequence                                            | Predicted MFI | Length | Net Arg | Net Charge |
|-----------------------------------------------------|---------------|--------|---------|------------|
| PRKKRRSRRRRRRLRGDPQPQGRKIYVLGTRRLQRR<br>RGPWRPRRRGR | 21.62         | 50     | 0.46    | 0.5        |
| KRRRRQIRRRRRYRLRNVLQPEQMRKQGLLGRRRRQL<br>RRYPYRR    | 21.27         | 44     | 0.45    | 0.48       |
| ARKRRQRKRRRRWPMGANLVFSLHYAQYTKGRRRRR<br>R           | 19.12         | 37     | 0.38    | 0.48       |
| RRRRRQKRRRRGPGGGDPEPAQGYPI                          | 16.18         | 27     | 0.37    | 0.33       |
| KAKRRQRRRRRRGPNGGDPSPSQHYPD                         | 16            | 27     | 0.33    | 0.36       |
| RRRRRQRRRRRGPQKPCPQPSQKYA                           | 15.85         | 26     | 0.42    | 0.5        |
| RRRRRQKRRRRWRNRGCPQPDQKYPDYC                        | 15.51         | 29     | 0.38    | 0.38       |
| RRRRRQRRRRRWPQRPLQPRQHILDYVN                        | 15.36         | 30     | 0.43    | 0.43       |
| RRRRREEKRRRRGPGGCLQFSLSAPQYSK                       | 15.2          | 30     | 0.3     | 0.3        |
| RRRRRQRRRRRWPMPGKMPQPSQ                             | 15.12         | 23     | 0.48    | 0.52       |
| KKKRRQRKRRRRRWRAGIPEPSFKYKQPPHGR                    | 15.04         | 32     | 0.31    | 0.49       |
| RRRRRQRRRRRWRGGPCPRPIQHIPPQ                         | 14.97         | 27     | 0.48    | 0.51       |
| RRRRRQRRRRRGRGGPRSQFSQHYPQ                          | 14.6          | 27     | 0.48    | 0.51       |
| RRRRRLGKRTRRGLGPCQFDEGILI                           | 14.28         | 27     | 0.3     | 0.26       |
| RRRRRQRPLRRRGPNKPCPEPDQ                             | 14.17         | 23     | 0.39    | 0.35       |
| KRRRREEKKKKKWRGGCPRPRQHYPQYPKG                      | 13.87         | 31     | 0.26    | 0.44       |
| RRRRRLKRRRRGPMGKCS                                  | 13.02         | 20     | 0.5     | 0.55       |
| RRRRRQKRRRRGCNGNCPD                                 | 12.92         | 20     | 0.5     | 0.5        |
| RRRRRQKRRRRGPMGPC                                   | 12.79         | 18     | 0.56    | 0.61       |
| RRRRRQKRRRRGPMGPC                                   | 12.52         | 18     | 0.5     | 0.61       |
| RRRRRQRRRRRWPMPG                                    | 12.5          | 16     | 0.69    | 0.69       |
| RRRRRQRRRRRGPM                                      | 12.44         | 15     | 0.73    | 0.73       |
| RRRRRQRRRRRWPMP                                     | 12.41         | 15     | 0.73    | 0.73       |
| RRRRRQRRRRRWPMPG                                    | 12.36         | 15     | 0.73    | 0.73       |
| RKRRRQRRRRRGPM                                      | 12.35         | 15     | 0.67    | 0.73       |
| RRRRRQRRRRRGPG                                      | 12.35         | 15     | 0.73    | 0.73       |
| RRKRRQRRRRRWP                                       | 12.27         | 14     | 0.71    | 0.79       |
| RRRRRQRRRRRGPM                                      | 12.27         | 14     | 0.79    | 0.79       |
| RRRRRQRNRRRRWPMP                                    | 12.23         | 15     | 0.67    | 0.67       |
| RRRRRQRPRRRRWP                                      | 12.2          | 14     | 0.71    | 0.71       |
| RRRRRQKRRRRWPMP                                     | 12.08         | 15     | 0.6     | 0.73       |
| RRRRRERKRRRRWPMPG                                   | 11.97         | 16     | 0.62    | 0.62       |
| RRRRRQKRRRRWP                                       | 11.96         | 15     | 0.6     | 0.73       |

|              |       |    |      |      |
|--------------|-------|----|------|------|
| RRRRRQRRRRR  | 11.53 | 13 | 0.85 | 0.85 |
| RRRRRQRRRRR  | 11.53 | 12 | 0.92 | 0.92 |
| RRKRRQRRRRR  | 11.49 | 12 | 0.83 | 0.92 |
| RRRRRQKRRRR  | 11.48 | 12 | 0.83 | 0.92 |
| RRKRRQKRRRR  | 11.45 | 12 | 0.75 | 0.92 |
| RKRRRQRRRRR  | 11.44 | 12 | 0.83 | 0.92 |
| RRRRRQPRRRR  | 11.39 | 12 | 0.83 | 0.83 |
| RRRRRQERRRR  | 11.15 | 12 | 0.83 | 0.75 |
| RRKRQRRRRRR  | 10.61 | 12 | 0.75 | 0.83 |
| RRRRRLRRRRR  | 10.6  | 12 | 0.92 | 0.92 |
| RRRRRQRRKRR  | 10.56 | 12 | 0.83 | 0.92 |
| RRKRRQRRRRHR | 10.51 | 12 | 0.75 | 0.9  |
| HRKRRQ       | 6.7   | 7  | 0.43 | 0.68 |
| HRKRRQ       | 6.7   | 6  | 0.5  | 0.8  |
| RRRRRQ       | 6.61  | 6  | 0.83 | 0.83 |
| HRKRRE       | 5.91  | 6  | 0.5  | 0.63 |
| RRKRRM       | 5.42  | 6  | 0.67 | 0.83 |

## 5 Attribution analysis

### 5.1 Interpretability

Using the conceptual attribution framework developed to understand activation of neural networks for image classification, we developed a toolkit to visualize the decision making process of the CNN model.<sup>11</sup> We chose the first convolution layer of the model to access the fingerprint indices. Taking the first derivative of the model output (normalized fluorescence intensity) with respect to the input representation (row matrix of fingerprints), produces a Jacobian matrix of partial derivatives. We performed element-wise multiplication of the Jacobian with the input representation to zero out the activation of absent chemical features, and clipped negative values, to focus on features that drive high MFI. We analyzed the role of individual activated fingerprints by visualizing the corresponding chemical substructure, and also obtained the average activation over the residue positions and fingerprint indices (Fig. S7 and S8).

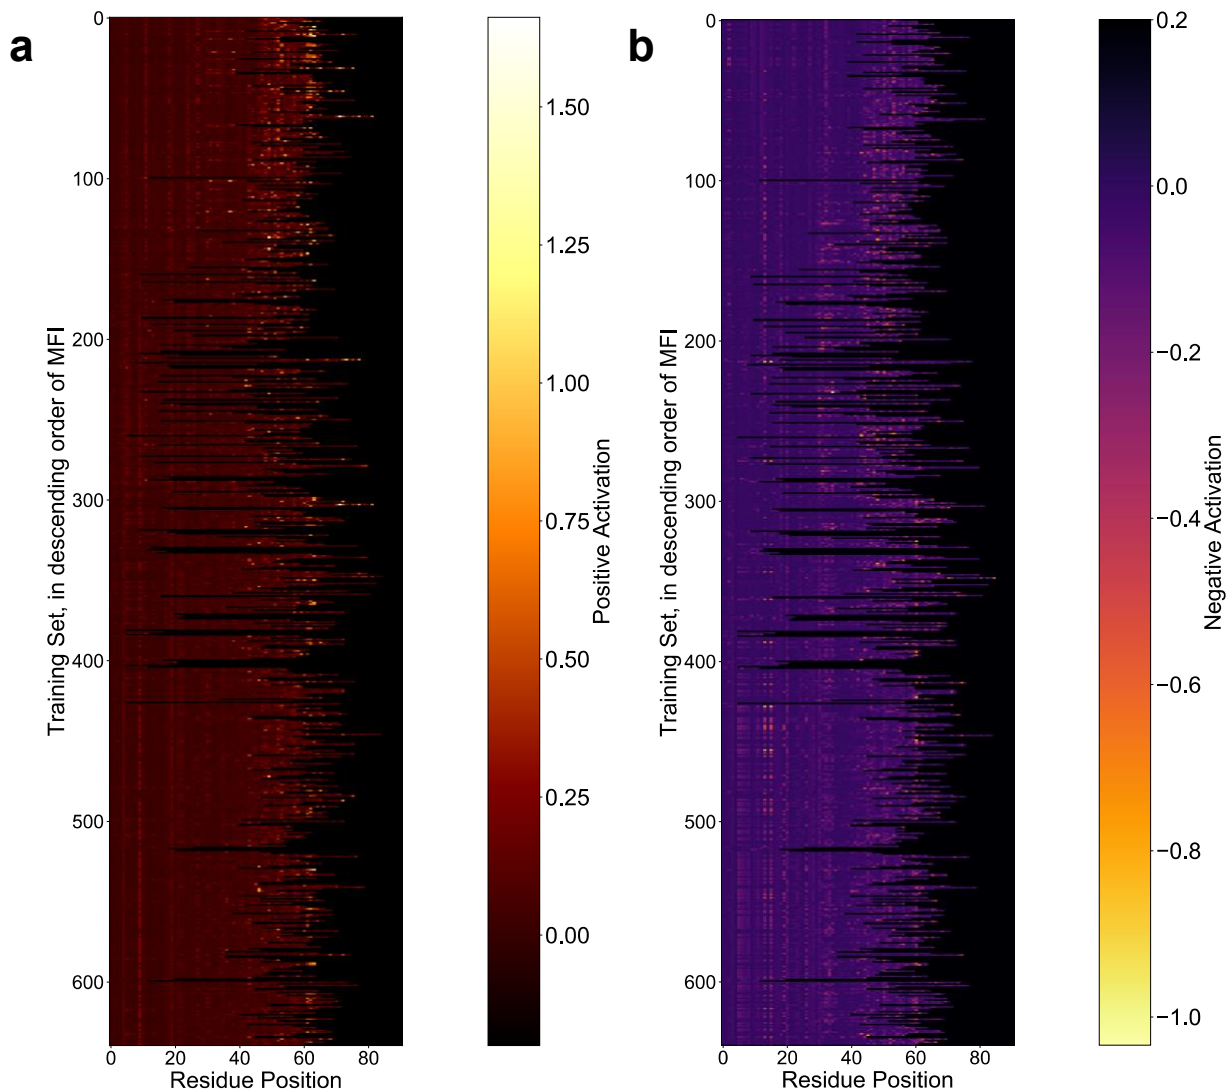

**Figure 7 Activation map of predictor training set relative to amino acid position.** Gradient activations for sequences are arranged in descending order of experimental normalized MFI for (a) positive and (b) negative activation averaged over residue position. The positive activation for C-terminal residues decreases with decrease in normalized MFI values. The most active sequences have a highly positively activated C-terminus and a sparsely negatively activated C-terminus.

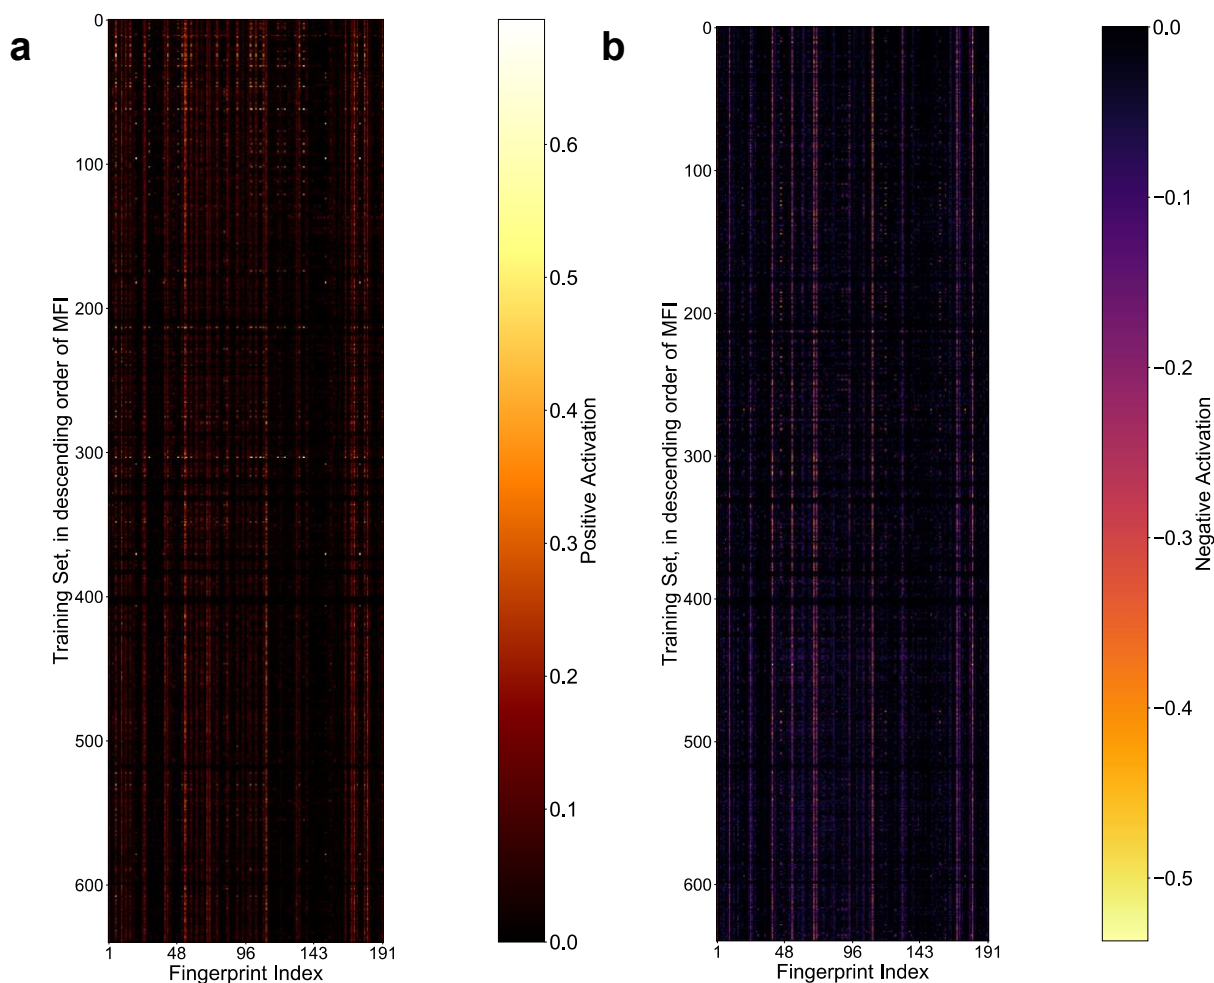

**Figure 8 Activation map of predictor training dataset relative to fingerprint index.** Gradient activations for sequences are arranged in descending order of normalized MFI for (a) positive and (b) negative activation averaged over fingerprint index. The most positively activated substructures by residue are for aminohexanoic acid,  $\beta$ -alanine, aspartic acid, threonine and serine.

## 5.2 Robustness of Attribution Analysis

We evaluated the robustness of gradient-based attribution by analyzing residue-activations for mutated Mach3 sequences (Fig. S9). We mutated each active Ahx residue individually with Ala, followed by both with beta-alanine and aminoundecanoic acid. This experiment is analogous to the method reported for validating attributions for protein-ligand binding by designing an adversarial ligand, which is a modified version of a correctly predicted ligand.<sup>12</sup> In this report, the modified ligand, present in a database of useful decoys<sup>13</sup>, should have been predicted as non-binding, however, the model owing to other substructures inaccurately predicts this as a binding ligand.

Consistent with our earlier findings, we observed that the most activated residue was the lone Ahx in single Ala mutations, followed by Arg when both Ahx are mutated to Ala or  $\beta$ -Ala, residues

with a shorter alkyl backbone. The most activated residue reverts back to undecanoic acid, a residue with a longer alkyl backbone than Ahx, for the undecanoic acid mutation. This experiment validates the robustness of attribution analysis, both in terms of activated residues which conform to known biochemical principles and experimental validation of the mutations (SM Section 8).

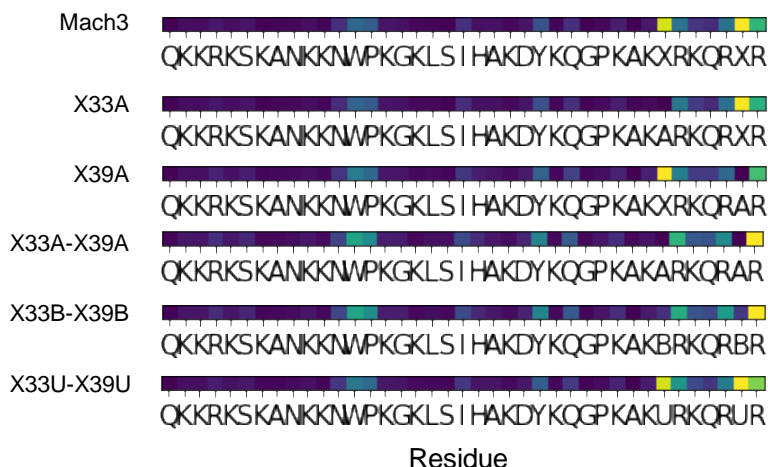

**Figure 9. Attribution analysis of mutations.** Alanine and  $\beta$ -Alanine mutations of the most active residue(s) shows a fall in the predicted MFI and a corresponding change in the positive activation heatmap. Ahx remains the most active residue for single Ala mutations, that changes to Arg when both C-terminus Ahx are mutated to Ala and  $\beta$ -Ala. However, when Ahx is mutated to undecanoic acid (U), both U are the most positively activated residues.

## 6 Similarity and immunogenicity analysis of predicted sequences

### 6.1 Similarity of Training and Validation Sequences

Similarity among sequences in each training and validation dataset was analyzed using Jaro-Winkler distance metric (Fig. S10).<sup>14</sup> Each sequence was compared with the rest of the library to evaluate the string similarity.

The sequences used to train the generator have a mean similarity of 47%, indicating that we capture a combinatorial chemical space of cell-penetrating peptide sequences. For the sequences used to train the predictor, composed mostly of the modular library, the mean similarity is 66%. The modularity of the sequences from the library can be seen clearly in the visualization of sequence similarity (Fig S10). The four highlighted squares along the diagonal correspond to module 2 of the sequences. Similarly, the four lighter colored boxes correspond to module 3. The non-modular sequences, which are dissimilar from one another, are on the bottom of the visualization.

Finally, Mach sequences were confirmed to be unique by comparing to library sequences as well as a protein database. Similarity of Mach sequences was first compared to the library using mean Jaro-Winkler distance (Fig. S11). All Mach sequences had a mean similarity less than 60% when compared to the training dataset. Then to compare Mach peptides to the existing proteome, we used BLASTp on the online server.<sup>15</sup> The search was done using default values to search the UniProt database. There was no sequence homology between Mach sequences and known proteins for significant E-values less than 0.01. For the unnatural residues, B ( $\beta$ -alanine) and X (aminohexanoic acid) were replaced by A (alanine) and L (leucine) respectively for the search operation. Mach sequences containing cysteine macrocycles were excluded from the search.

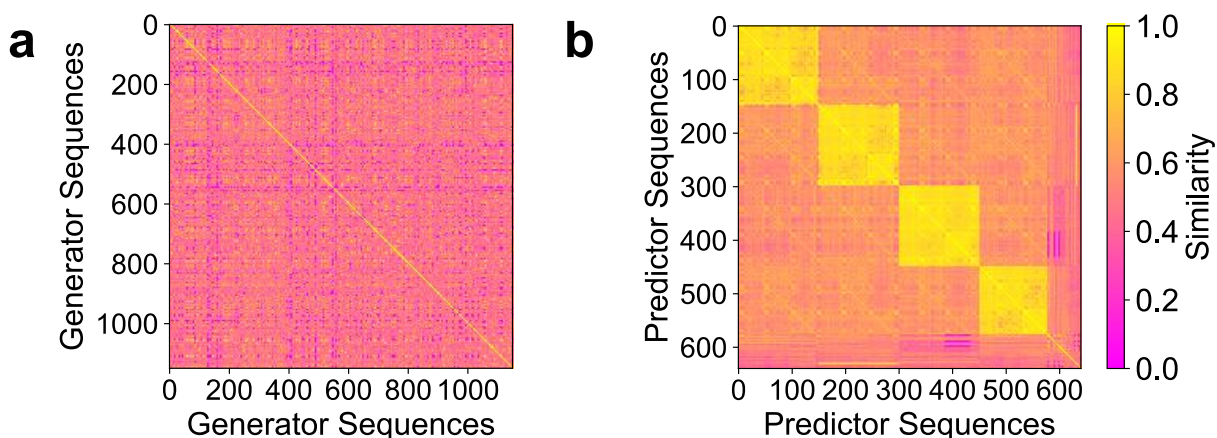

**Figure 10 Similarity of sequences used in the training of generator and predictor.** Each sequence used in training of (a) generator (Nested LSTM) and (b) predictor (Convolutional Neural Network based model) is compared with the rest of respective training dataset. The mean similarities of the sequences are 47% and 66% for the generator and predictor respectively. The heatmap for the predictor sequences have a modular pattern owing to the combinatorial nature of the library. Jaro-Winkler distance was used as the metric to assess the similarity between two sequences



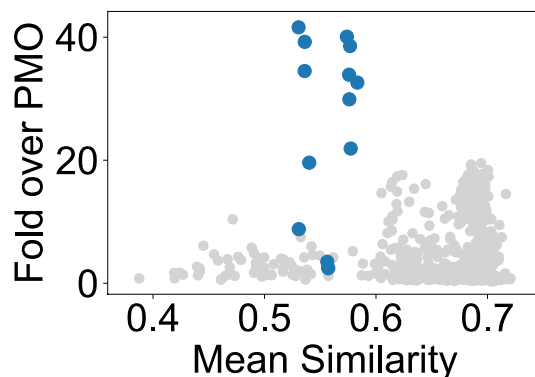

**Figure 11. Similarity and experimental normalized MFI of Mach and training sequences.** Mach sequences (blue) are novel and high-performing in comparison to the sequences used in the training of the predictor (grey). For each Mach sequence, the Jaro-Winkler distance with the predictor training dataset was averaged. For the rest of the training dataset, the mean similarity was calculated by averaging over the similarity with rest of the library. The mean similarities for all Mach sequences is less than 60%.

## 6.2 Immunogenicity Score of Predicted and Library Sequences

The likelihood of being a T-cell epitope was calculated for all sequences using an online server.<sup>16</sup> The score is an arbitrary number, where a higher positive value indicates a higher probability of the peptide to be immunogenic and vice-versa. For the unnatural residues, B ( $\beta$ -alanine) and X (aminohexanoic acid) were replaced by A (alanine) and L (leucine) respectively for the search operation. The Mach sequences were compared to the sequences used in the training of the predictor (Fig. S12).

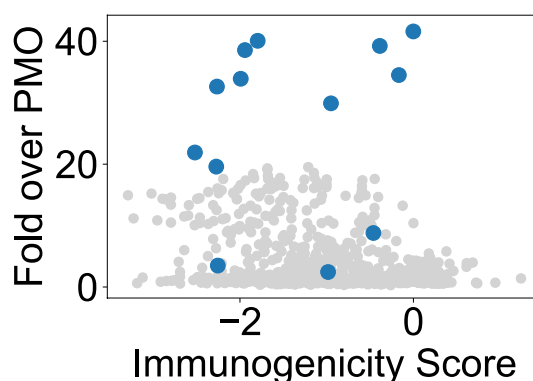

**Figure 12. In silico immunogenicity score for Mach and training sequences.** Predicted immunogenicity for Mach sequences is within the range of the predicted immunogenicity for the sequences used in training of predictor. Mach sequences have a substantially higher experimental normalized MFI within the same range of immunogenicity, in comparison to the sequences used in the training of the predictor. The immunogenicity scores are the likelihood of being a T-cell epitope. The values are calculated using an online predictor.<sup>16</sup>

## 7 Evaluation of PMO-Mach constructs

### 7.1 Endocytosis Inhibition Assays

Chemical endocytosis inhibitors were used to probe the mechanism of delivery of PMO in a pulse-chase format. For the PMO constructs, HeLa 654 cells were preincubated with various chemical inhibitors or incubated at 4 °C for 30 minutes before treatment with PMO-Mach constructs for three hours. Treatment media was then replaced with fresh media for 22 hours. Cells were then lifted as previously described and EGFP synthesis was measured by flow cytometry (Fig. S13).

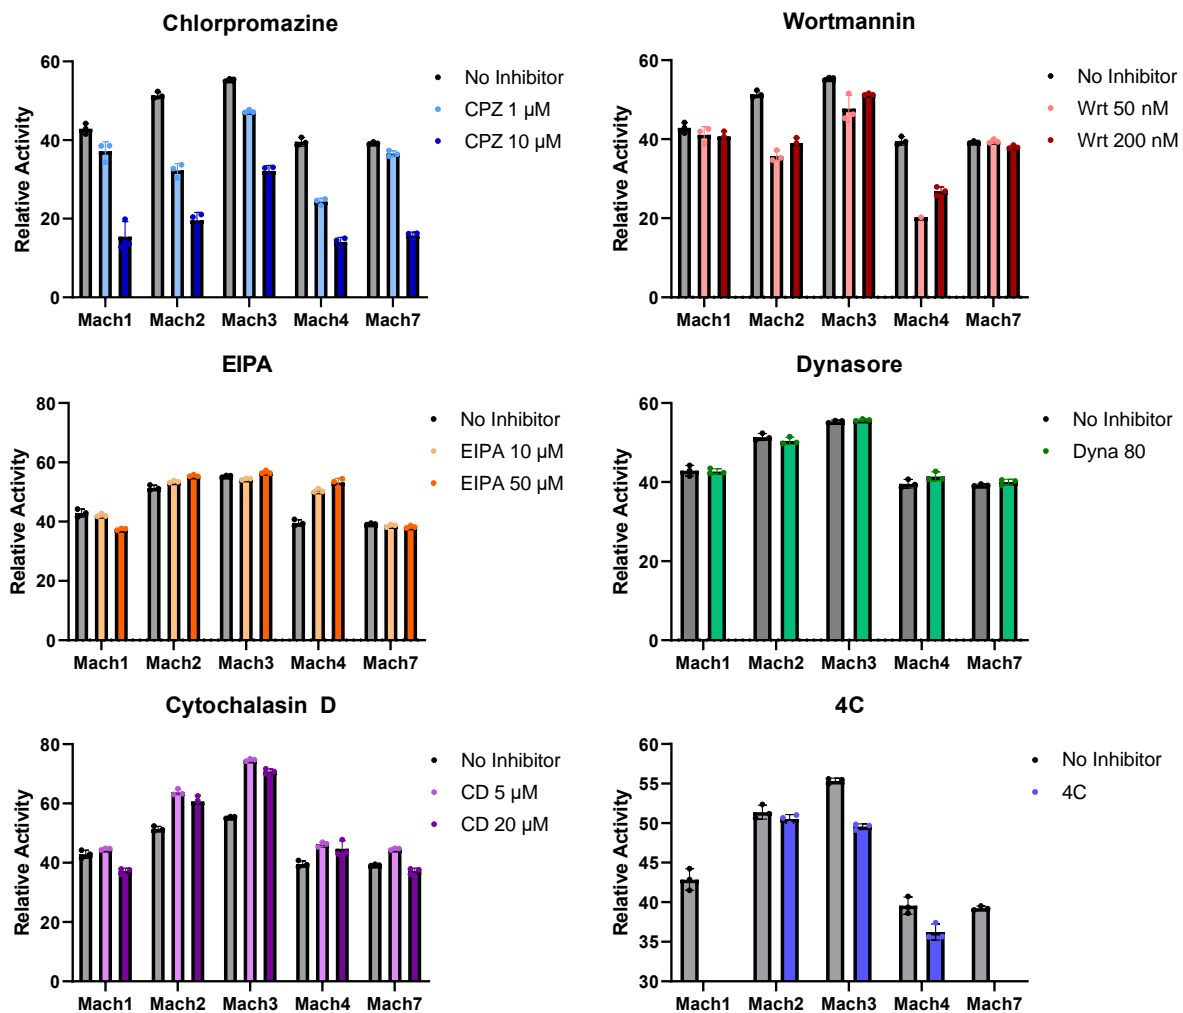

**Figure 13. PMO-Mach peptides enter cells by energy-dependent endocytosis.** PMO activity of Mach constructs when treated with various endocytosis inhibitors. Chlorpromazine (CPZ) has a dose-dependent effect on PMO activity for each of the Mach constructs, indicating that constructs may enter via clathrin-mediated endocytosis. Each bar represents group mean  $\pm$  SD,  $n = 3$ , with the exception of Mach4 Wrt 50 nM condition in which  $n=1$  due to Wrt toxicity to cells.

## 7.2 Circular Dichroism

Peptides were dissolved in PBS buffer to obtain stock solutions of 1 mM. The circular dichroism (CD) spectra was obtained from 195 to 250 nm using an AVIV 420 circular dichroism spectrometer with a 1 mm path length quartz cuvette. Peptides in PBS buffer at 20  $\mu$ M, with or without 10 mM sodium dodecyl sulfate (SDS) were used in the measurement (Fig. S14).

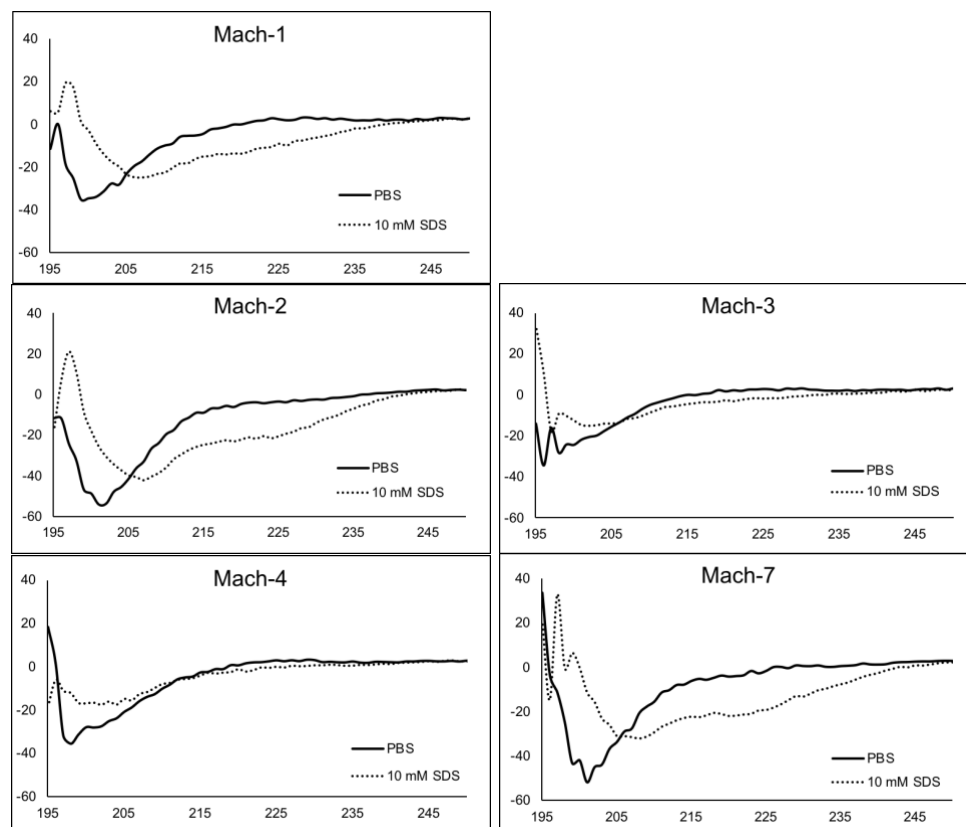

**Figure 14. Circular dichroism of azide-Mach peptides.** 20  $\mu$ M Mach peptides were either incubated in PBS or 10 mM SDS before analysis using circular dichroism. In buffer, these peptides do not exhibit secondary structure. In a lipid environment, Mach1, Mach2, and Mach7 exhibit partial alpha helicity.

## 7.3 Inflammation panel

THP-1 cells (ATCC TIB-202) were grown in RPMI 1640 media supplemented with 10% (v/v) FBS, 1% (v/v) penicillin-streptomycin, L-glutamine, non-essential amino acids, sodium pyruvate at 37  $^{\circ}$ C and 5%  $\text{CO}_2$ . THP-1 cells (450k/mL) were treated with 25 nM phorbol 12-myristate 13-acetate (PMA) at 37  $^{\circ}$ C and 5%  $\text{CO}_2$  for 24 h to trigger differentiation into macrophages. Then, media was replaced with fresh RPMI media and the cells were incubated for another 24 h. Cells

were then collected, spun down, and brought up in complete RPMI media to a cell density of 500k/mL. 100k cells were plated in each well of a 96-well plate, leaving the first two columns empty. Duplicate wells were treated with varying concentrations of the PMO-peptide conjugates at 37 °C and 5% CO<sub>2</sub> for 2 h. Media-only and no treatment wells were used as negative controls, and 10 µg/mL bacterial lipopolysaccharide (LPS) treatment was used as a positive control. Following treatment, each well was washed three times, given fresh media, and incubated for 12 h. Supernatant was transferred to a V-bottom plate. Inflammatory cytokines in the supernatant were assayed using LEGENDplex Human Inflammation panel (BioLegend). Analysis was carried out on a BD LSRII flow cytometer and data was analyzed using BioLegend's accompanying software (Fig S15).



**Figure 15. PMO-Mach constructs are nonimmunogenic in vitro.** Inflammation panel results of cytokines that were detected in human monocyte-derived macrophages. IL-1B, TNF-a, IL-6, IL-10, and MCP-1 are all released after treatment with lipopolysaccharide (LPS), but exhibit no significant increase after treatment with PMO-Mach constructs. Each bar represents group mean, n = 2.

## 8 Post-hoc mutations of PMO-Mach miniprotein

Attribution analysis provides opportunity for post-hoc experimentation with peptide sequences. Given that Ahx is highly activated in Mach3, and reports that extended alkyl backbone chain amino acids have a large effect on CPP activity, we hypothesized that mutating these residues to residues with a longer chain may increase activity. Also observed is that the C-terminus of Mach3 and Mach7 are the highest activated regions on the sequence, we hypothesized that the 10 C-terminal residues may retain some CPP activity.

We made several point mutations and truncations to Mach3 and Mach7 to investigate our hypotheses. Mutating to undecanoic acid indeed enhanced the activity of Mach3, decreasing the EC50 to 0.6  $\mu$ M from 1.5  $\mu$ M. Mutation from X to B decreased activity only slightly in both Mach3 and Mach7 (Fig S16). Finally, the 10 C-terminal residues of each miniprotein do not retain the activity of the full-length sequence (Fig. S17).

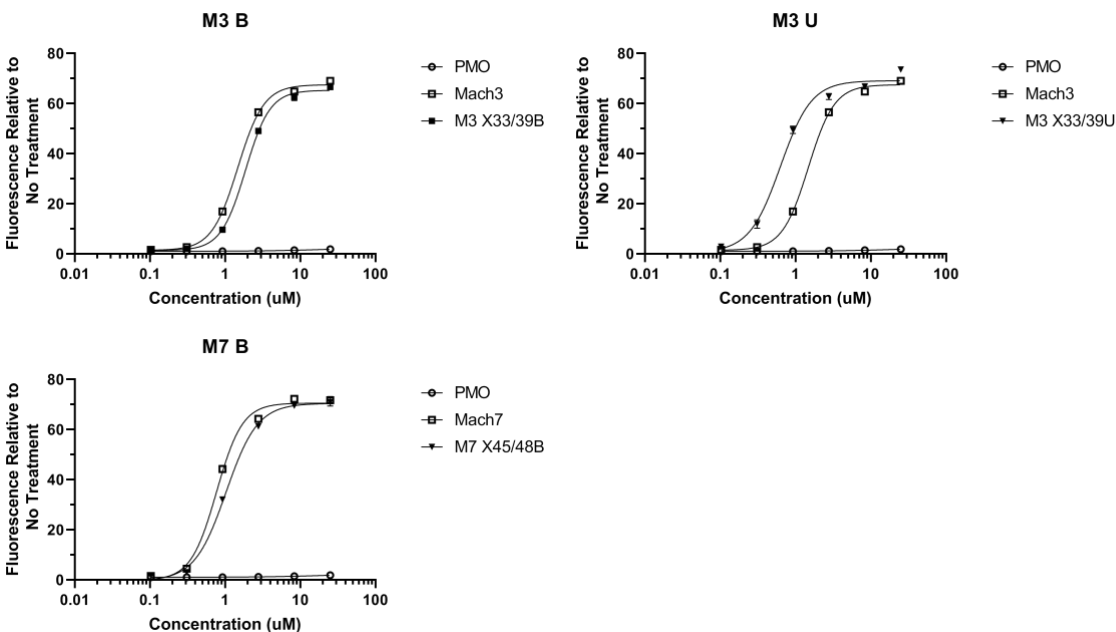

Mach3 QKKRKS KANKKNWPKGKLS IHAKDYQGPKAKX RKQRXR  
Mach3 X33,38B QKKRKS KANKKNWPKGKLS IHAKDYQGPKAKB RKQRBR  
Mach3 X33,38U QKKRKS KANKKNWPKGKLS IHAKDYQGPKAKU RKQRUR  
Mach7 XKHPXAVQBAARAWKVPAAALWKKKRLKKS SKQKKKWLWKARSA X KYXRLI  
Mach7 X45,48B XKHPXAVQBAARAWKVPAAALWKKKRLKKS SKQKKKWLWKARSA B KYBRLI

**Figure 16. Mutations of Mach peptides can affect activity.** Shown are dose-response curves in HeLa 654 after testing with PMO-Mach analogs, along with their sequences. B = beta-alanine, X = aminohexanoic acid, U = aminoundecanoic acid. Mutation to beta-alanine decreases activity

slightly. Mutation to aminoundecanoic acid increases activity of Mach3 significantly. Activity is shown as fluorescence relative to untreated cells, with the curve corresponding to PMO alone also shown. Points and error bars represent mean and standard deviation, respectively. n = 3.

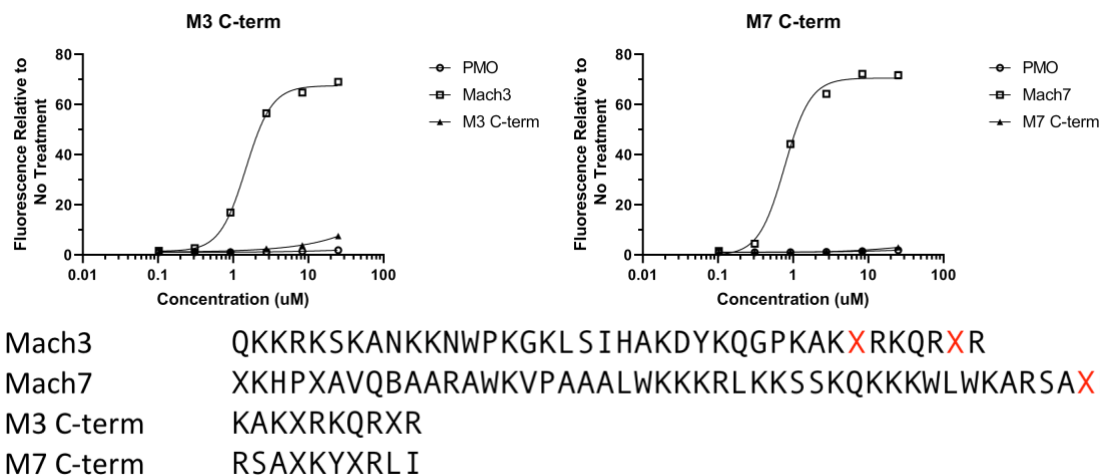

**Figure 17. Truncation of Mach peptides ablates PMO activity.** Shown are dose-response curves in HeLa 654 after testing with PMO-Mach analogs, along with their sequences. B = beta-alanine, X = aminohexanoic acid. The 10 C-terminal residues of Mach3 and Mach7 do not retain the activity of the parent sequence. Activity is shown as fluorescence relative to untreated cells, with the curve corresponding to PMO alone also shown. Points and error bars represent mean and standard deviation, respectively. n = 3.

## 9 Recombinant Expression & Purification

His<sub>6</sub>-SUMO-G<sub>5</sub>-DTA(C186S), His<sub>6</sub>-SUMO-G<sub>5</sub>-DTA(C186S, E148S) and G<sub>5</sub>-EGFP-His<sub>6</sub> were overexpressed in *E. coli* BL21 (DE3) cells. Approximately 10 g of cell pellet was lysed by sonication in 50 mL of 20 mM Tris, 150 mM NaCl, pH 7.5 buffer containing 30 mg lysozyme, 2 mg DNAase I, and 1 tablet of cOmplete™ Protease Inhibitor Cocktail. The suspension was centrifuged at 16,000 rpm for 30 min to remove cell debris. The supernatant was loaded onto a 5 mL HisTrap FF Ni-NTA column (GE Healthcare, UK) and washed with 30 mL of 100 mM imidazole in 20 mM Tris, 150 mM NaCl, pH 8.5. Protein was eluted from the column with buffer containing 300 mM imidazole in 20 mM Tris, 150 mM NaCl, pH 8.5. Imidazole was removed from protein via centrifugation in Millipore centrifugal filter unit (10K).

For the DTA constructs, the His<sub>6</sub>-SUMO tag was then cleaved from the protein with SUMO protease (previously recombinantly expressed) by incubating a 1:1000 protease:protein ratio in 20 mM Tris, 150 mM NaCl, pH 7.5 overnight at 4 °C. Desired protein was separated from His<sub>6</sub>-

SUMO tag by flowing the mixture through a 5 mL HisTrap FF Ni-NTA column. Finally, purified protein was isolated by size exclusion chromatography using HiLoad 26/600 Superdex 200 prep grade size exclusion chromatography column (GE Healthcare, UK) in 20 mM Tris, 150 mM NaCl, pH 7.5 buffer.

For the EGFP construct, purified protein was isolated by anion exchange chromatography using HiTrap Q HP anion exchange chromatography column (GE Healthcare, UK) in (0-40 %B over 20 CV) where A: 20 mM Tris, pH 8.5 buffer and B: 1 M NaCl, 20 mM Tris, pH 8.5 buffer.

Proteins were analyzed using an SDS-Page gel. In addition, proteins were analyzed by ESI-QTOF LCMS to confirm molecular weight and purity. The protein charge-state envelope was deconvoluted using Agilent MassHunter Bioconfirm using maximum entropy.

## Supplemental References

1. Hartrampf, N. *et al.* Synthesis of Proteins by Automated Flow Chemistry. *ChemRxiv Prepr.* (2020) doi:10.26434/chemrxiv.11833503.v1.
2. Pedregosa, F. *et al.* Scikit-learn: Machine Learning in Python. *J. Mach. Learn. Res.* **12**, 2825–2830 (2011).
3. Chen, T. & Guestrin, C. XGBoost: A Scalable Tree Boosting System. in *Proceedings of the 22nd ACM SIGKDD International Conference on Knowledge Discovery and Data Mining* 785–794 (Association for Computing Machinery, 2016). doi:10.1145/2939672.2939785.
4. Head, T., Kumar, M., Nahrstaedt, H., Louppe, G. & Shcherbatyi, I. *scikit-optimize/scikit-optimize*. (Zenodo, 2020). doi:10.5281/zenodo.4014775.
5. Gautam, A. *et al.* In silico approaches for designing highly effective cell penetrating peptides. *J. Transl. Med.* **11**, 74 (2013).
6. Wei, L., Tang, J. & Zou, Q. SkipCPP-Pred: an improved and promising sequence-based predictor for predicting cell-penetrating peptides. *BMC Genomics* **18**, 742 (2017).
7. Wei, L. *et al.* CPPred-RF: A Sequence-based Predictor for Identifying Cell-Penetrating Peptides and Their Uptake Efficiency. *J. Proteome Res.* **16**, 2044–2053 (2017).
8. Manavalan, B., Subramaniyam, S., Shin, T. H., Kim, M. O. & Lee, G. Machine-Learning-Based Prediction of Cell-Penetrating Peptides and Their Uptake Efficiency with Improved Accuracy. *J. Proteome Res.* **17**, 2715–2726 (2018).
9. Qiang, X. *et al.* CPPred-FL: a sequence-based predictor for large-scale identification of cell-penetrating peptides by feature representation learning. *Brief. Bioinform.* **21**, 11–23 (2020).
10. Wolfe, J. M. *et al.* Machine Learning To Predict Cell-Penetrating Peptides for Antisense Delivery. *ACS Cent. Sci.* **4**, 512–520 (2018).
11. Selvaraju, R. R. *et al.* Grad-CAM: Visual Explanations from Deep Networks via Gradient-Based Localization. *Proc. IEEE Int. Conf. Comput. Vis.* 618–626 (2017) doi:10.1109/ICCV.2017.74.



12. McCloskey, K., Taly, A., Monti, F., Brenner, M. P. & Colwell, L. J. Using attribution to decode binding mechanism in neural network models for chemistry. *Proc. Natl. Acad. Sci.* **116**, 11624–11629 (2019).
13. Mysinger, M. M., Carchia, M., Irwin, John. J. & Shoichet, B. K. Directory of Useful Decoys, Enhanced (DUD-E): Better Ligands and Decoys for Better Benchmarking. *J. Med. Chem.* **55**, 6582–6594 (2012).
14. Winkler, W. E. String Comparator Metrics and Enhanced Decision Rules in the Fellegi-Sunter Model of Record Linkage. (1990).
15. Altschul, S. F., Gish, W., Miller, W., Myers, E. W. & Lipman, D. J. Basic local alignment search tool. *J. Mol. Biol.* **215**, 403–410 (1990).
16. Calis, J. J. A. *et al.* Properties of MHC Class I Presented Peptides That Enhance Immunogenicity. *PLoS Comput. Biol.* **9**, (2013).

## Supplemental Figures and Tables

**Table 12: List of peptides used for each module in the 600-member library\***

| PMO       | Name                    | Sequence                                      |
|-----------|-------------------------|-----------------------------------------------|
|           | PMO IVS2-654            | GCT ATT ACC TTA ACC CAG                       |
| Peptide 1 | Name                    | Sequence                                      |
|           | Penetratin              | RQIKIWFQNRRMKWKK                              |
|           | pVec                    | LLIILRRRIRKQAHAAHSK                           |
|           | TP10                    | AGYLLGKINLKALAALAKKIL                         |
|           | DPV6                    | GRPRESGKKRKRRLKP                              |
| Peptide 2 | Name                    | Sequence                                      |
|           | KRVK (NLS)              | KRVK                                          |
|           | SV40 (NLS)              | PKKKRKV                                       |
|           | AAV-PHP.eB              | SDGTLAVPFKA                                   |
| Peptide 3 | Name                    | Sequence                                      |
|           | DPV6                    | ZGRPRESGKKRKRRLKP                             |
|           | PPC3                    | ZKKYRGRKRHPR                                  |
|           | PPC5                    | ZGRKAARAPGRRKQ                                |
|           | R12                     | ZRRRRRRRRRRRR                                 |
|           | R12 full cycle          | Z <u>C</u> RRRRRRRRRRRR <u>C</u>              |
|           | R12 N-cycle             | Z <u>C</u> RRRRRRR <u>C</u> RRRRRR            |
|           | R12 C-cycle             | ZRRRRRRR <u>C</u> RRRRRR <u>C</u>             |
|           | R12 benzyl<br>bicycle   | Z <u>C</u> RRRRRRR <u>C</u> RRRRRR <u>C</u>   |
|           | R12 double cycle        | Z <u>C</u> RRRRRRR <u>CC</u> RRRRRR <u>CC</u> |
|           | Bpep                    | ZRXRRBRRXRRBR                                 |
|           | Bpep full cycle         | Z <u>C</u> RXRRBRRXRRB <u>C</u>               |
|           | Bpep C-cycle            | ZRXRRBR <u>C</u> RXRRB <u>C</u>               |
|           | Penetratin (nle)        | ZRQIKIWFQNRRMKWKK                             |
|           | Engrailed N-cycle       | Z <u>C</u> QIKIWF <u>C</u> NKRAKIKK           |
|           | Engrailed C-cycle       | ZSQIKIWFQ <u>C</u> KRAKIK <u>C</u>            |
|           | Engrailed full<br>cycle | Z <u>C</u> SQIKIWFQNKRAKIK <u>C</u>           |
|           | pVEC                    | ZLLIILRRRIRKQAHAAHSK                          |
|           | pVEC-Bpep               | ZLLIILRRRIRKQAHAAHSKRXRRBRRXRRBR              |
|           | AIP6 full cycle         | Z <u>C</u> RRLRW <u>C</u>                     |
|           | Melittin-Bpep           | ZGIGAVLKVLTTGLPALISWIKRKRQQRXRRBRRXRR<br>BR   |
|           | Bh3 helix               | ZIWIAQELRRIGDEFNAYYARR                        |
|           | Bac7                    | ZRRIRPRPRLPRPRPRPLPFPRPG                      |

|                |                                |
|----------------|--------------------------------|
| Buforin 2      | ZTRSSRAGLQWPVGRVHRLLRK         |
| Melittin       | ZGIGAVLKVLTTGLPALISWIKRKRQQ    |
| SynB1          | ZRGGRLSYSRRRFSTSTGR            |
| S413-PVrev     | ZALWKTLLKKVLKAPKKKRKV          |
| Ribotoxin2 L3  | ZKLIKGRTPIKFGKADCDRPPKHSQNGMGK |
| PreS2-TLM      | ZPLSSIFSRIGDP                  |
| MAP            | ZKLALKALKALKAALKLA             |
| W/R            | ZRRWRRWRR                      |
| MAP12          | ZLKTLETETLKELTKLTEL            |
| SAP            | ZVRLPPPVRLLPPPVRLLPPP          |
| SVM1           | ZFKIYDKKVRTRVVKH               |
| SVM3           | ZKGTYYKKLMRIPLKGT              |
| SVM4           | ZLYKKGPAKKGRPPLRGWFH           |
| YTA4           | ZIAWVKAFIRKLRKGPLG             |
| 439a           | ZGSPWGLQHHPPT                  |
| HoxA13 serine2 | ZRQVTIWSQNRRVKSKK              |
| Bip            | ZVSALK                         |
| PPR3           | ZPPRPPRPPR                     |
| PPR4           | ZPPRPPRPPRPPR                  |
| AIP6           | ZRLRWR                         |
| DPV15b         | ZGAYDLRRRERQSRLRRRERQSR        |
| TAT            | ZRKKRRQRRR                     |
| Penetratin     | ZRQIKIWFQNRRMKWKK              |
| R9             | ZRRRRRRRRR                     |
| HoxA13 serine1 | ZRSVTIWFQSRRVKEKK              |
| KRVK TP10      | ZKRVKAGYLLGKINLKALAALAKKIL     |
| TP10 KRVK      | ZAGYLLGKINLKALAALAKKILKRVK     |
| SV40 TP10      | ZPKKKRKVAGYLLGKINLKALAALAKKIL  |

\*Z refers to 4-pentynoyl. “C” refers to cysteines that are linked with decafluorobiphenyl. “C” refers to cysteines that are linked with 1,3,5-trisbromomethylbenzene. Module 4 included fifty CPPs, including a mixture of chimeric peptides, cyclic peptides, and bicyclic peptides that we have previously reported to improve PMO delivery.

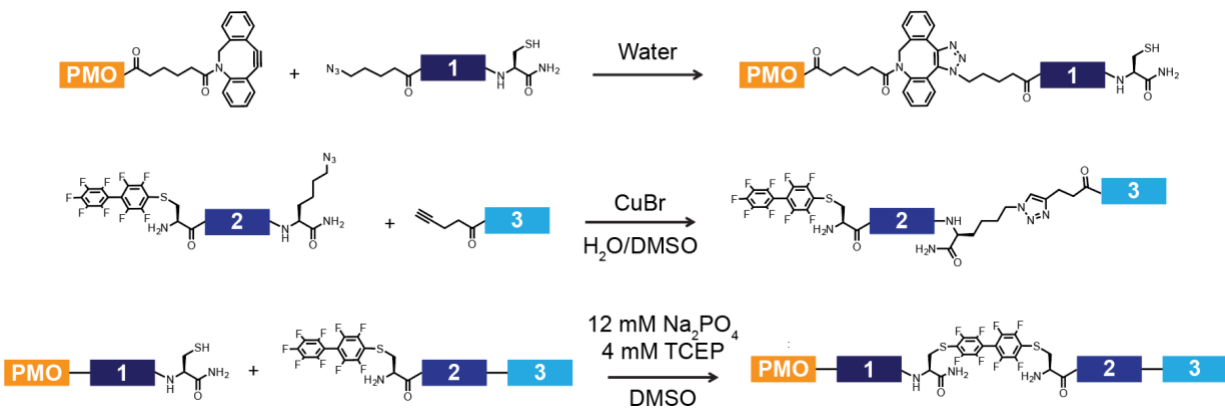

**Figure 18. Synthesis of modular library.**

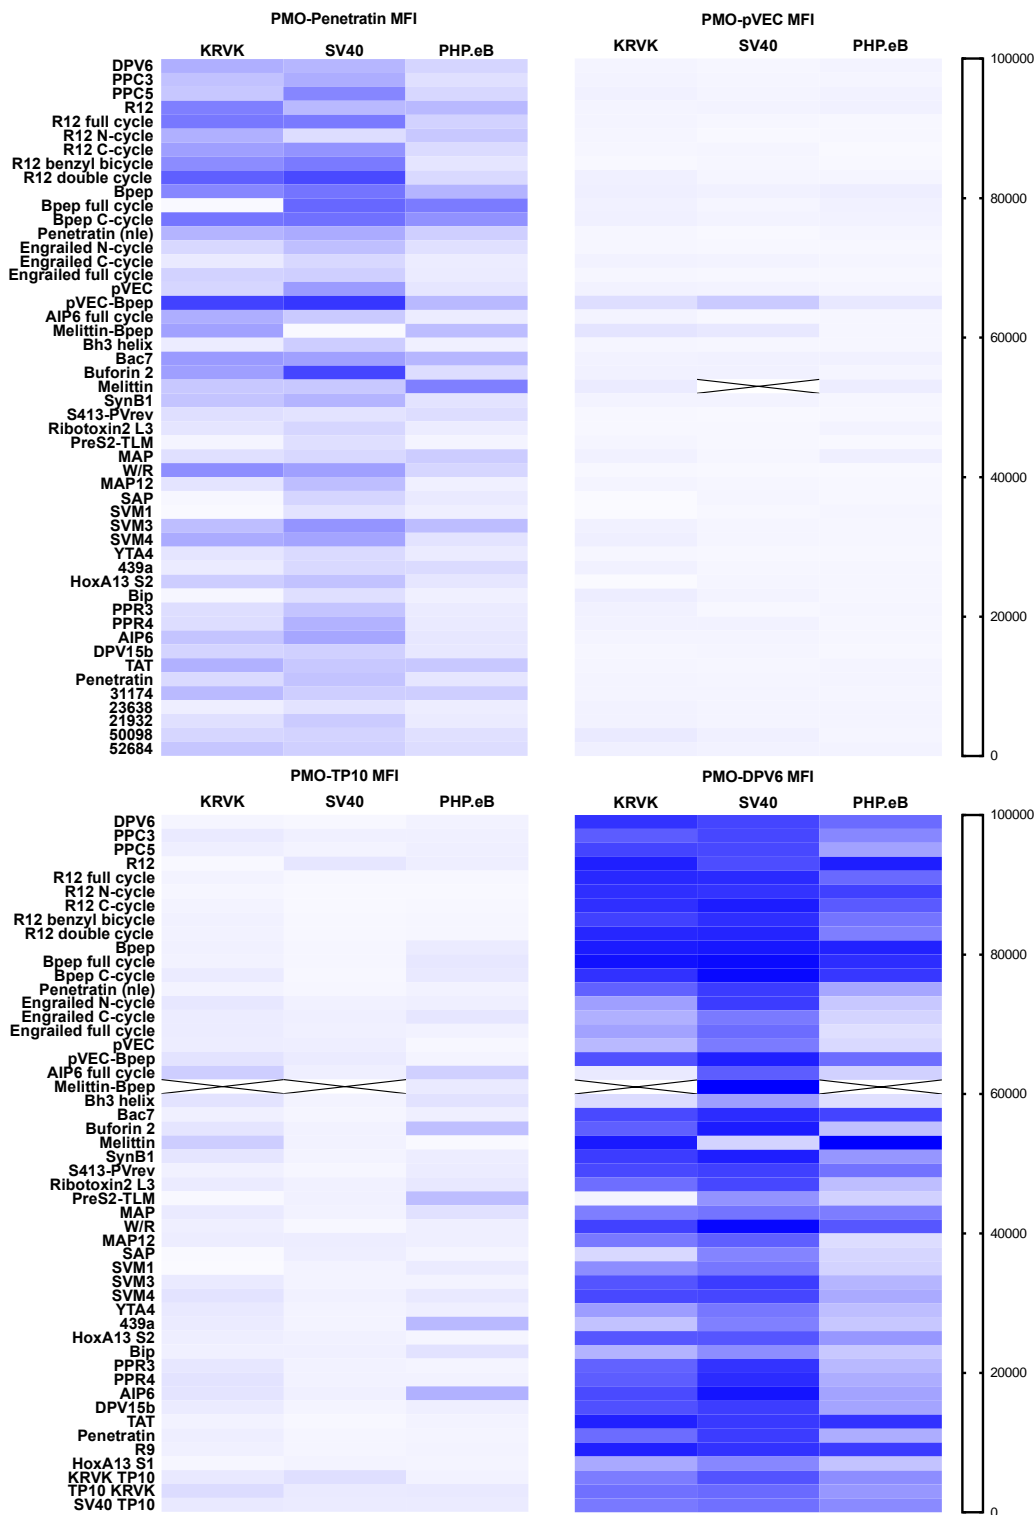

**Figure 19. Mean fluorescence intensity of 600-member library.** The heat maps show the mean fluorescence intensity of the 600 constructs tested in the HeLa-654 assay (n=1 replicate well). Boxes marked with an “X” are constructs in which the gated cell count was zero. The complete list of sequences and activities can be found in Supplemental Table 1.

**Table 13. List of Mach peptides.\***

|         |                                                                                            | Fold over PMO | % Arg | PPMO MW | Net charge |
|---------|--------------------------------------------------------------------------------------------|---------------|-------|---------|------------|
| Mach 1  | ALKBRSAAKAVRWPKKKIKQASK<br>KVAKYALXXXRKKKAASKXWLQ<br>LHWPRW                                | 45            | 8     | 12,645  | 18         |
| Mach 2  | PPLRNAKKKNLKNLKMDPKFTK<br>KVKQGALKLNRKKNRGPX<br>KHWT                                       | 27            | 8     | 12,499  | 18         |
| Mach 3  | QKKRKSANKKNWPKGKLSIAK<br>DYKQGPAAKXRKQRXR                                                  | 39            | 10    | 11,324  | 17         |
| Mach 4  | KKGKKQNKKKHRWPKKKVPQPK<br>KMFQAGABXR                                                       | 25            | 6     | 10,622  | 16         |
| Mach 5  | AKKKIAKAKKHRGPNBGIHAPVS<br>KIKDPLKXXX                                                      | 3             | 8     | 10,222  | 11         |
| Mach 6  | ALKBRSAAKAVRWPKKAIKQASK<br>KVAKYALKXXXRKKKAASKXWLQ<br>LHWPRW                               | 43            | 8     | 12,603  | 18         |
| Mach 7  | XKHPXAVQBAARAWKVPAAALW<br>KKKRLKSSKQKKKWLWKARSA<br>XKYXRLI                                 | 36            | 8     | 12,645  | 18         |
| Mach 8  | BKGKNLLAKIRRGPNGBQGSQ<br>GYLLYLLXRRRQRXXYPWRX<br>KHXRWXXRXXRHXRRRRQXLKP<br>DRXRGGKGSVS     | 39            | 21    | 15,929  | 22         |
| Mach 9  | KKKKNLNBKSRGPNGGALQPSQ<br>GYLQPLNXXRRRQRXXYPWRX<br>KHXRWRXRYHXRRRRQXLKPG                   | 38            | 21    | 14,845  | 22         |
| Mach 11 | TSNLKLHLAPPVKKKALKKPLYK<br>AKKKKKVVSPTWXTDQEW                                              | 4             | 0     | 11,423  | 11         |
| Mach 12 | KGGKNLAKKIRRGPNGGALQPSQ<br>GYLLYLBXXRRRQRXXGPXWRX<br>KHXRWXXXXXRPXRRRRQXL<br>CPGRXRPCRGSVS | 40            | 20    | 16,285  | 22         |
| Mach 13 | AKKKKLGBKALRWPNGKCPQPK<br>EKCPKYLLGRXRRKRXPWWR<br>XKHRRW                                   | 30            | 18    | 13,228  | 20         |

\*Peptide 10 was found to degrade in solution, so its analysis was discontinued. 'X' is 6-amino hexanoic acid, and 'B' is  $\beta$ -alanine. C residues are linked through decafluorobiphenyl.

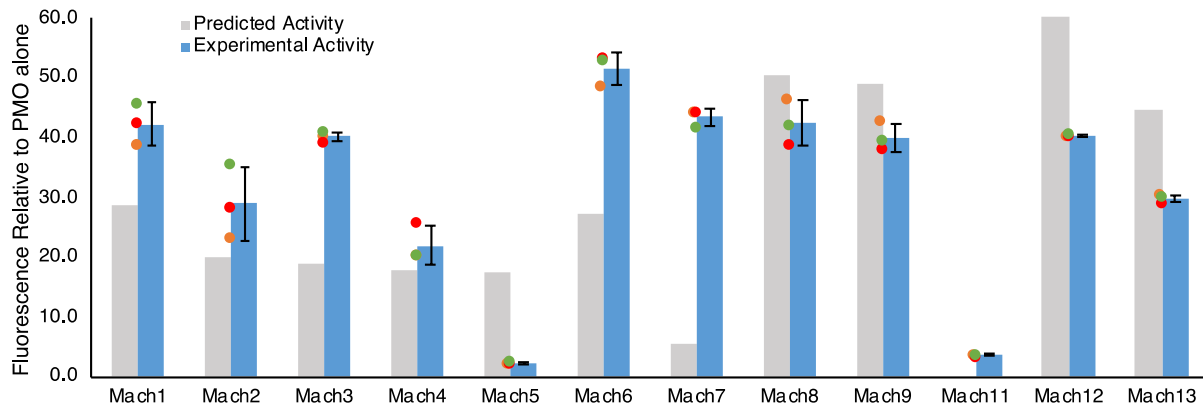

**Figure 20. Experimental vs Predicted activity of Mach peptides.** Mach peptides enhance delivery of PMO by 40-50 fold as determined by the HeLa 654 assay. Experimental activity (blue) is comparable to predicted activity (grey). Mach12 predicted activity is off the scale, at 140. Each bar represents group mean  $\pm$  SD, N = 3.

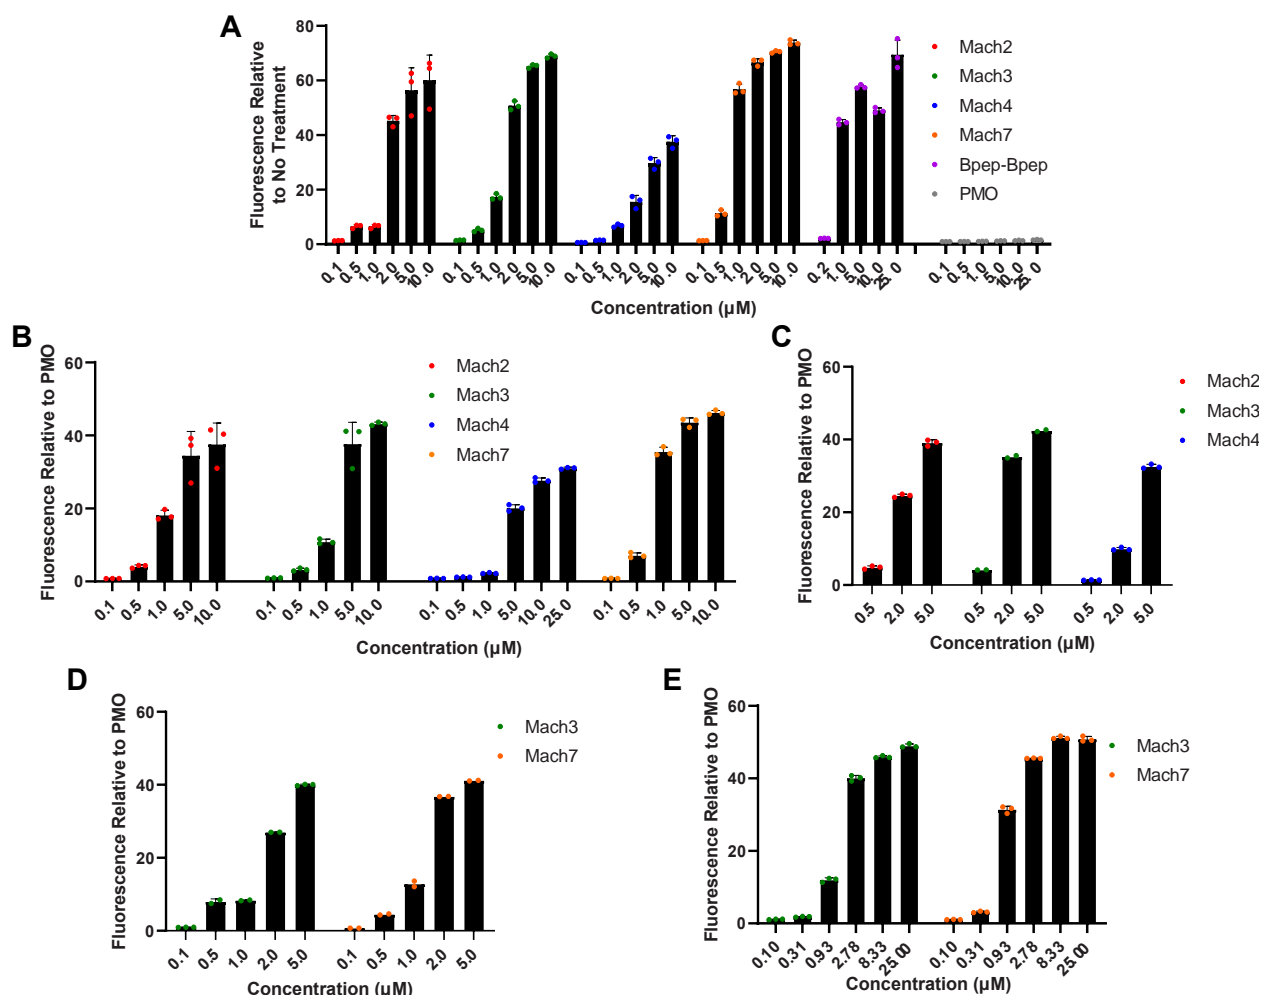

**Figure 21. Dose-response in HeLa 654 cells (Activity).** PMO-Mach constructs elicit a dose-dependent increase in EGFP fluorescence. (A) Shown is GFP fluorescence relative to the no treatment condition, including PMO alone. Also included here is chimera PMO-Bpep-Bpep, a previously reported high-performing PMO-peptide. Each bar represents group mean  $\pm$  SD, N = 3 distinct samples. (B-E) Shown is GFP fluorescence relative to the PMO alone condition. PMO-Mach peptides were tested at different concentration ranges with similar results. Each bar represents group mean  $\pm$  SD, N = 3 distinct samples, except for (C) Mach3 and (D) Mach7 in which bar represents group mean, N = 2.



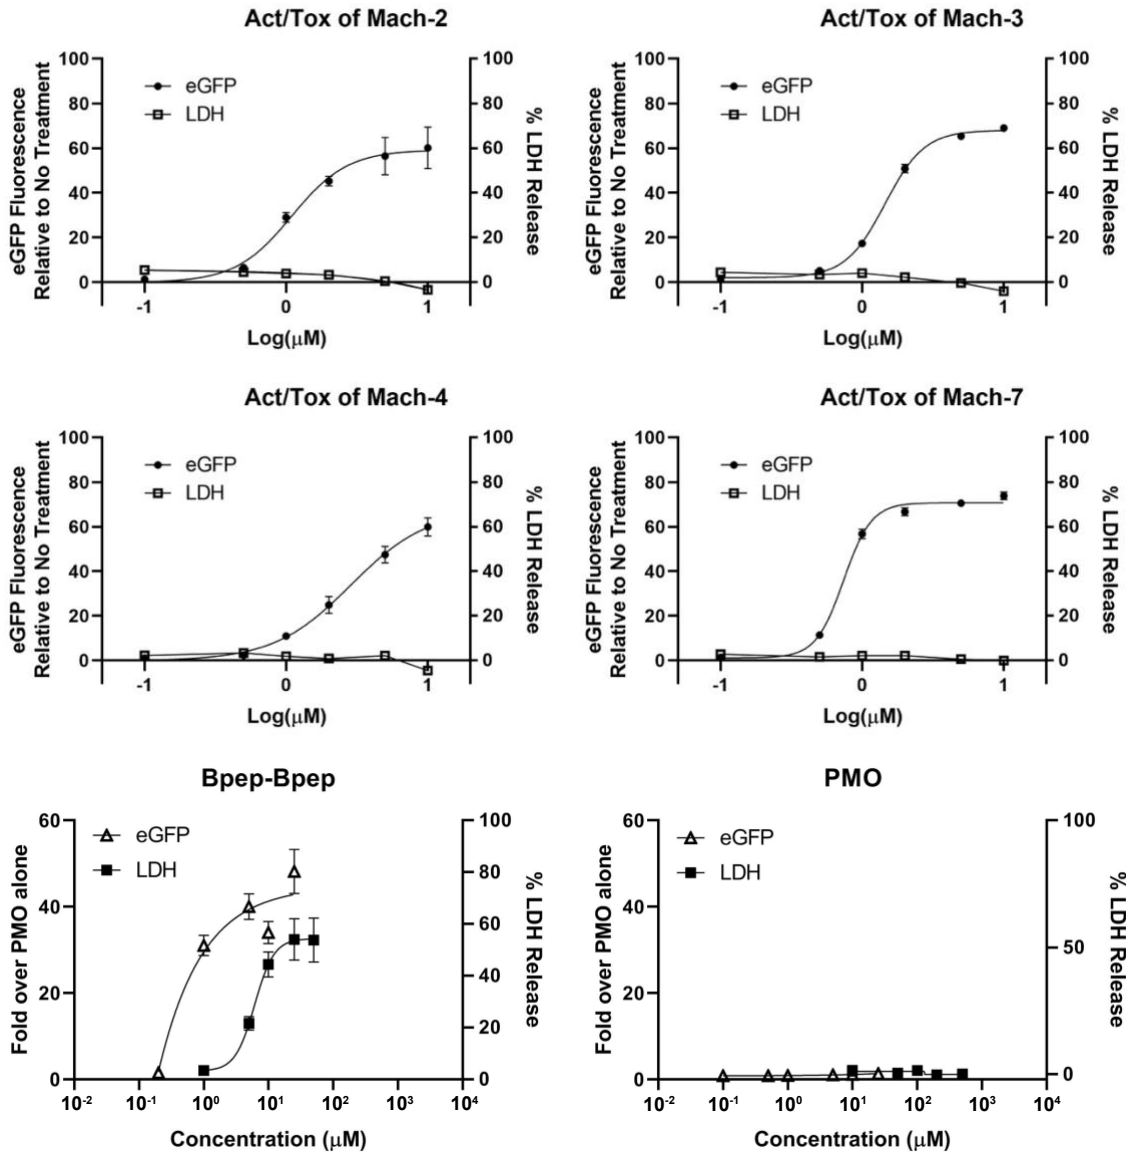

**Figure 22. Dose response curves corresponding to activity and toxicity in HeLa 654.** HeLa 654 cells were treated with varying concentrations of PMO-Mach constructs or PMO-Bpep-Bpep for 22 h. RPTEC cells were also treated with the same concentrations of PMO-Bpep-Bpep, as in Figure 23. Following treatment, cell supernatant was removed and tested for LDH release, reported as % LDH release relative to full lysis control (LDH, square). Toxicity is compared to activity (EGFP, triangle) in HeLa 654 from Figure 21. Each point represents group mean  $\pm$  SD, N = 3 distinct samples.

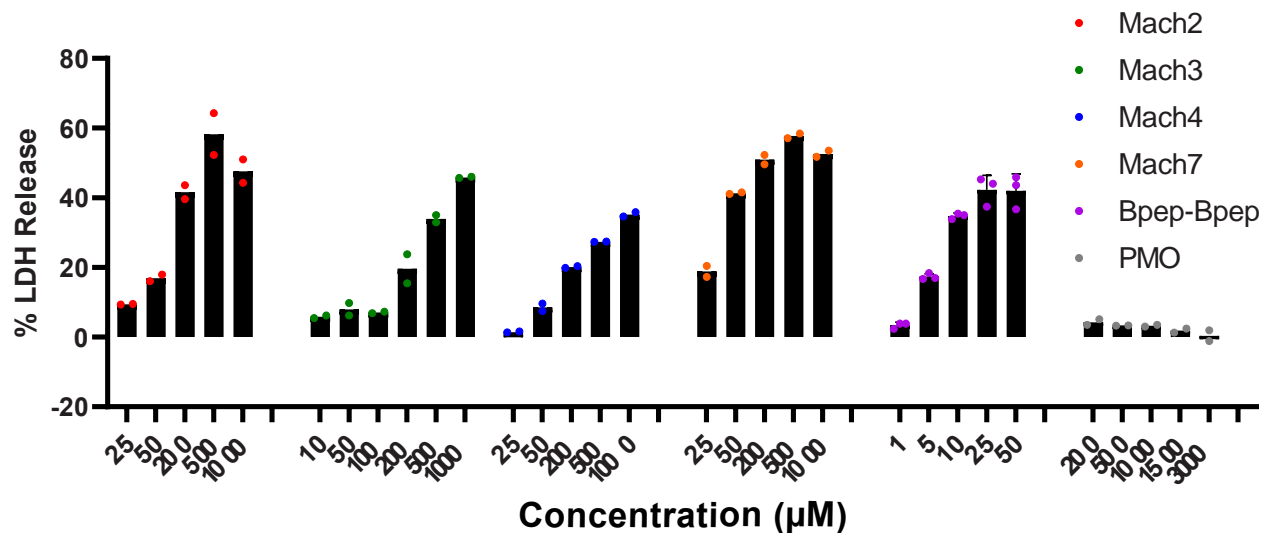

**Figure 23. Dose-response in RPTEC (Toxicity).** PMO-Mach constructs elicit a dose-dependent increase in membrane toxicity as measured by LDH release assay. Data shown here for Mach3, 4, and 7 are what is shown in main text Figure 4A-C. LC50 of PMO-Mach constructs are between 100-200  $\mu\text{M}$ , in contrast to PMO-Bpep-Bpep, which has a significantly lower LC50 near 10  $\mu\text{M}$ . Each bar represents group mean  $\pm$  SD,  $N = 2$ , except for Bpep-Bpep  $N = 3$  distinct samples.

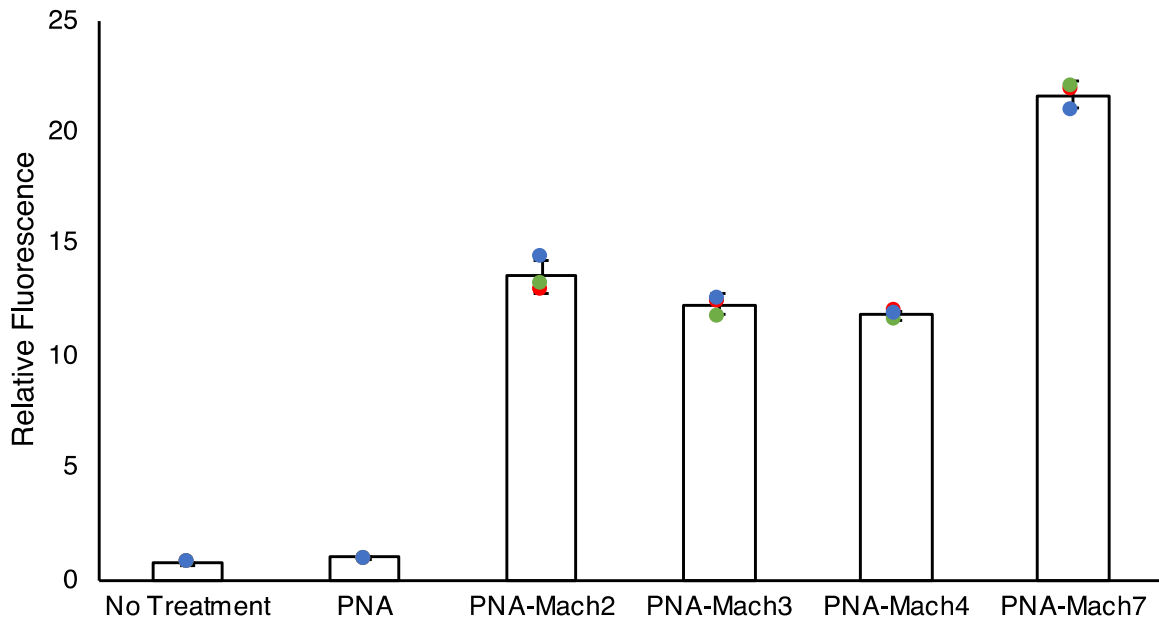

**Figure 24. Mach peptides enhance delivery of peptide nucleic acid (PNA).** PNA-Mach constructs were evaluated at 5  $\mu$ M in the HeLa EGFP 654 assay. Each bar represents group mean  $\pm$  SD, N = 3 distinct samples.

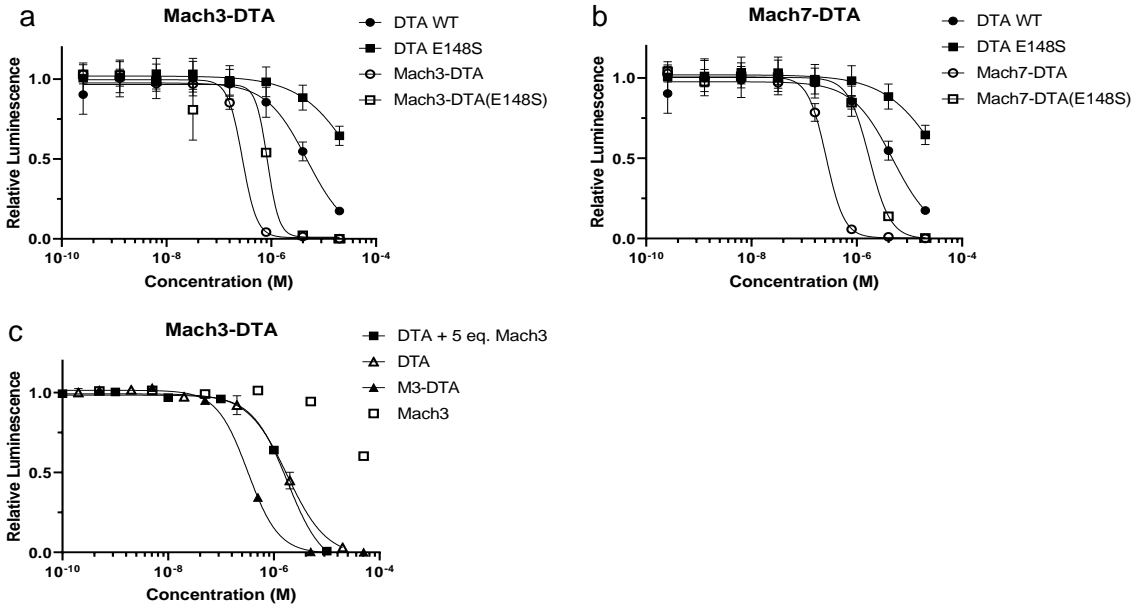

**Figure 25. Mach-DTA conjugates produce dose-dependent toxicity in HeLa cells.** Attachment of WT DTA to (a) Mach3 or (b) Mach7 produces significantly greater activity than attachment to DTA (E148S) which has 300-fold lower activity than wild-type. (c) Covalent attachment of Mach3 is required for DTA constructs to be delivered to the cytosol. DTA alone has the same toxicity as DTA co-incubated with 5 equivalents of Mach3 peptide. Each point represents group mean  $\pm$  SD, N = 3 distinct samples, with the exception of Mach3-DTA(E148S) and Mach7-DTA(E148S) in which n = 2. Experiments, excluding Mach3-DTA(E148S) and Mach7-DTA(E148S), were repeated at slightly different concentrations with similar results.

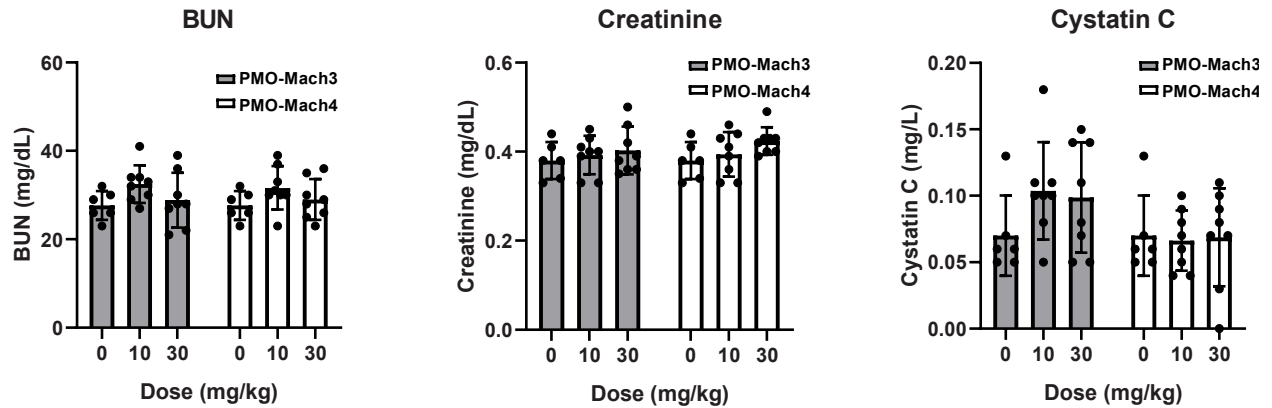

**Figure 26. PMO-Mach constructs do not induce kidney toxicity in mice.** In EGFP 654 mice, levels of (a) blood urea nitrogen (BUN), (b) creatinine, and (c) cystatin C remained unchanged. Each bar represents group mean  $\pm$  SD. Saline (n = 6), Mach3 and Mach4 at 5 mg/kg (n = 4), all other n = 8 mice. A two-tailed Mann-Whitney U test showed no significant difference between groups.

## Appendix 1 LC-MS Characterization

PMO-DBCO (Method A)

Mass Expected: 6527.9 Da

Mass Observed: 6527.9 Da

PMO sequence: GCT ATT ACC TTA ACC CAG

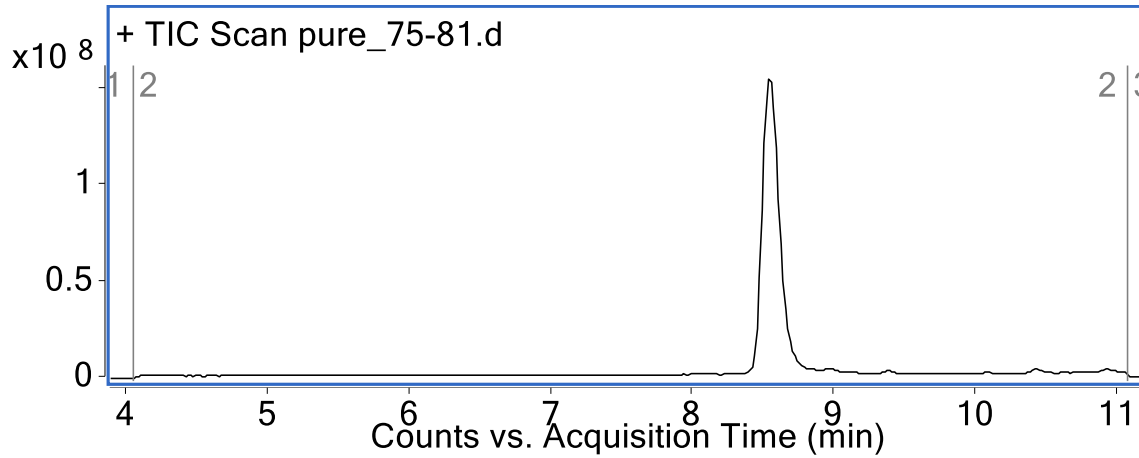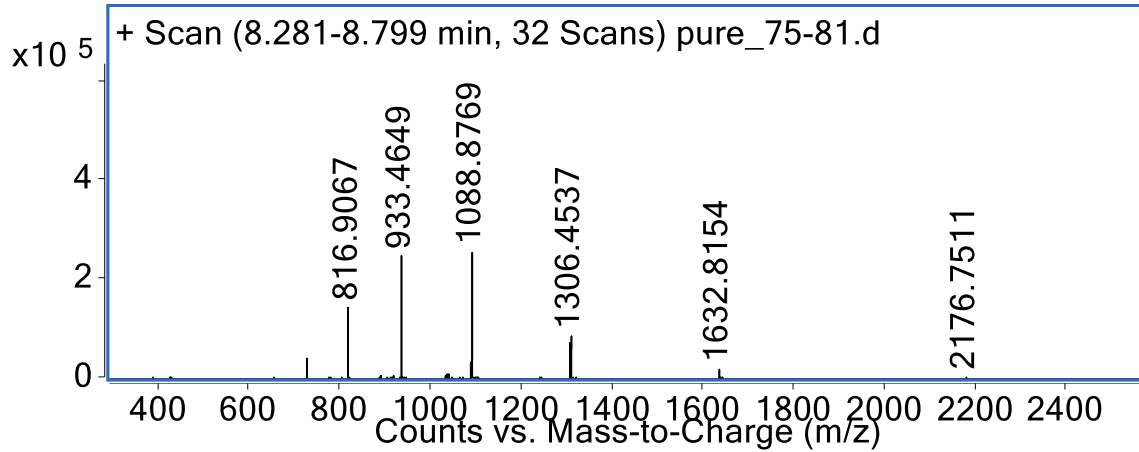

PMO-Mach1 (Method B)

Mass Expected: 12645.4 Da

Mass Observed: 12645.6 Da

Peptide sequence:

ALKBRSAAKAVRWPKKKIKQASKKVAKYALXXXRKKKAASKXWLQLHWPRW

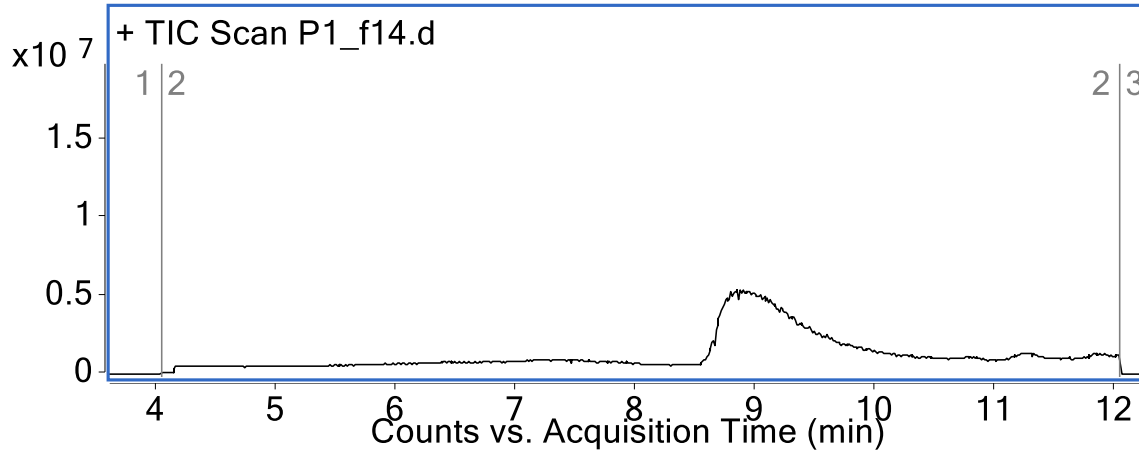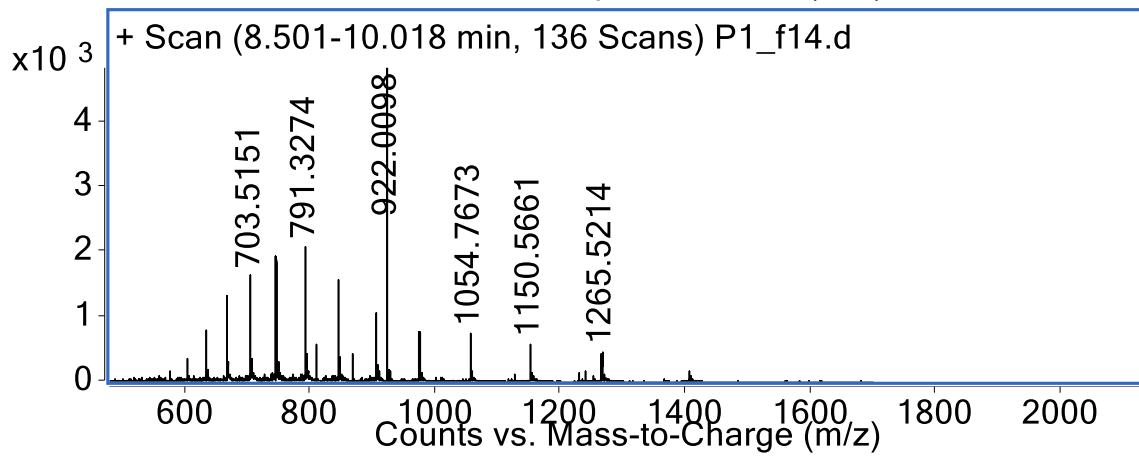

PMO-Mach2 (Method B)

Mass Expected: 12499.1 Da

Mass Observed: 12499.2 Da

Peptide sequence:

PPLRNAKKKLNKNNLKMDPKFTKKVKQGALKLNRRKKNRGPKGPXKHWTT

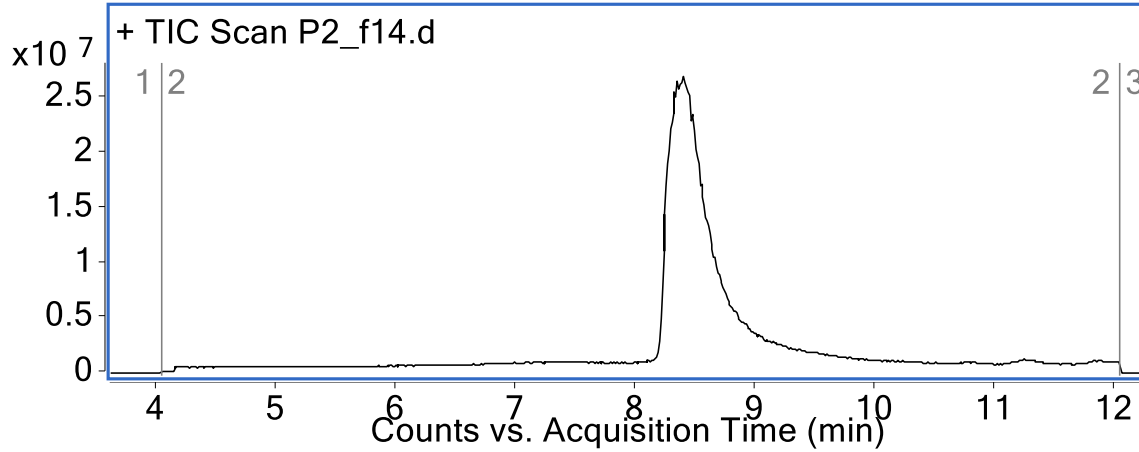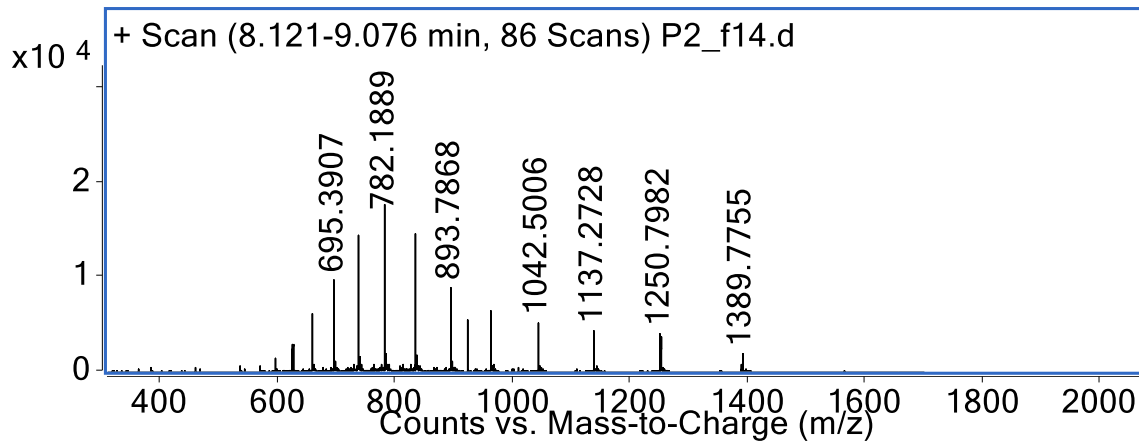



PMO-Mach3 (Method A)

Mass Expected: 11323.6 Da

Mass Observed: 11324.3 Da

Peptide sequence: QKKRKSKANKKNWPKGKLSIHAKDYKQGPKAKXRKQRXR

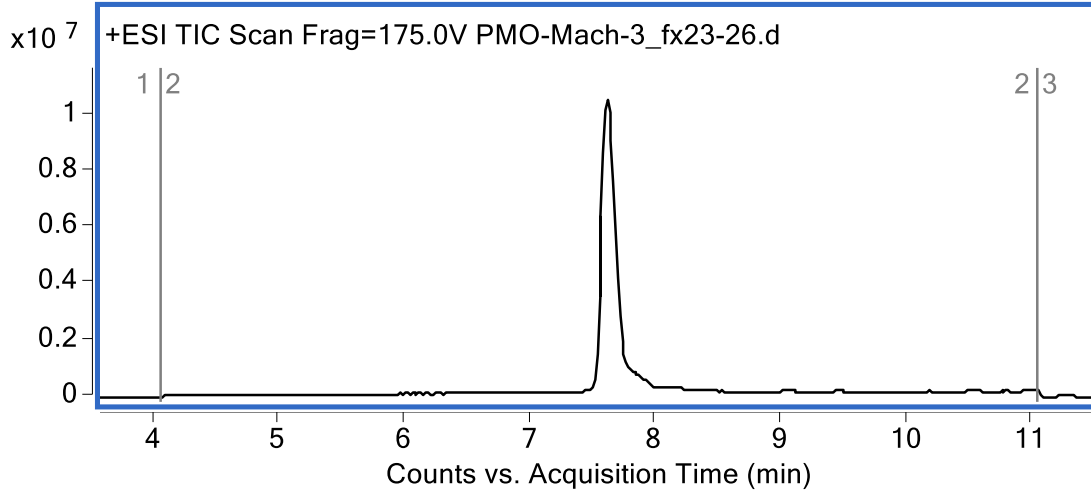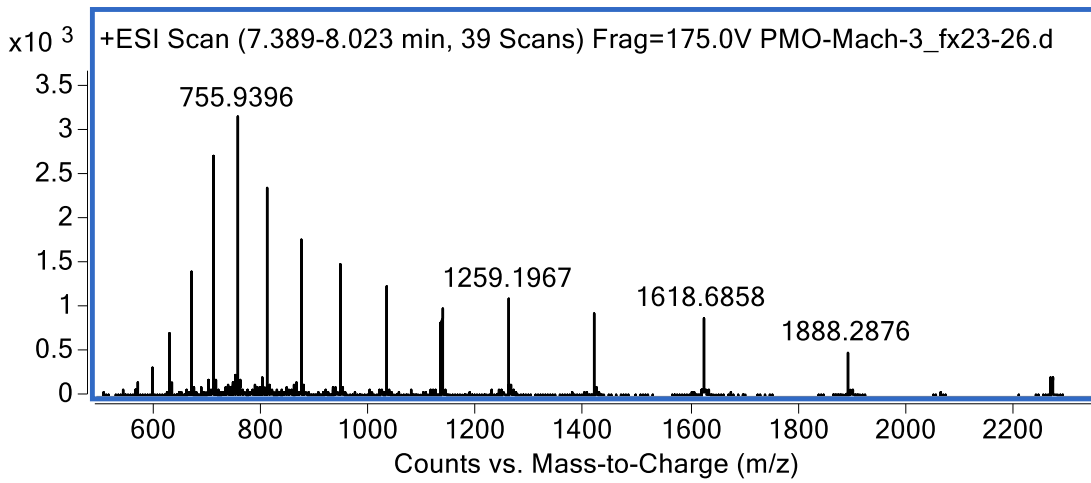

PMO-Mach4 (Method A)

Mass Expected: 10622.0 Da

Mass Observed: 10622.5 Da

Peptide sequence: KKGKKQNKKKHRWPKKKVPQPKKMFKQGABXRX

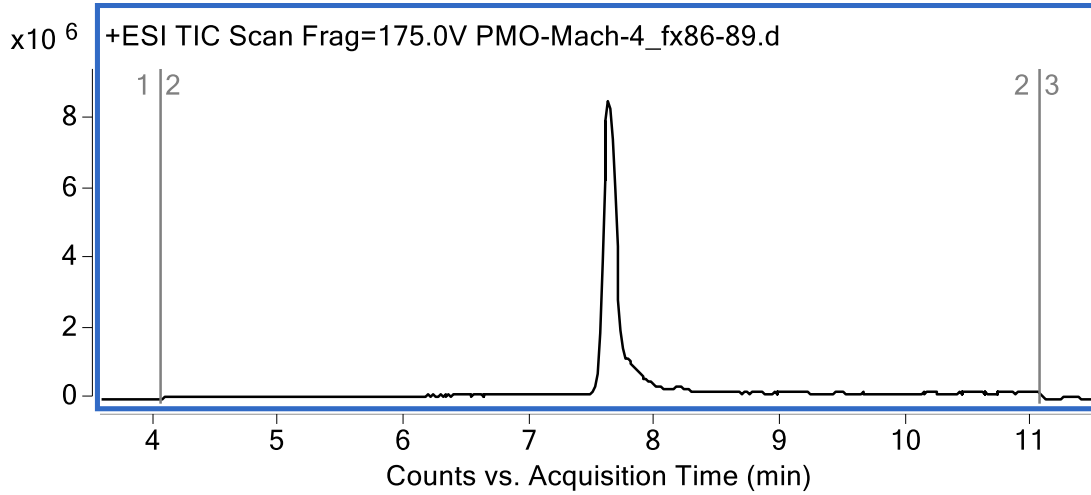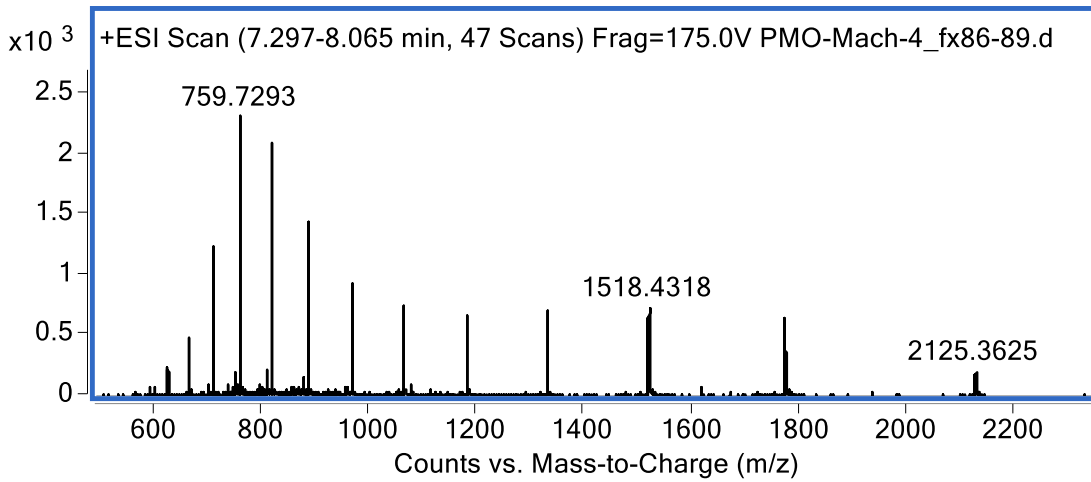

PMO-Mach5 (Method A)

Mass Expected: 10222.5 Da

Mass Observed: 10222.5 Da

Peptide sequence: AKKKIAKAKKHRGPNBGIHAPVSKIKDPLKXXX

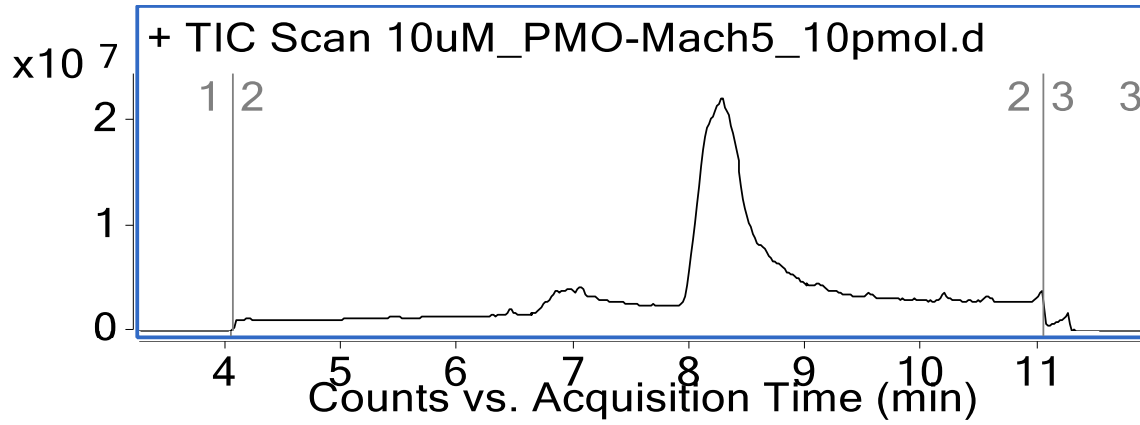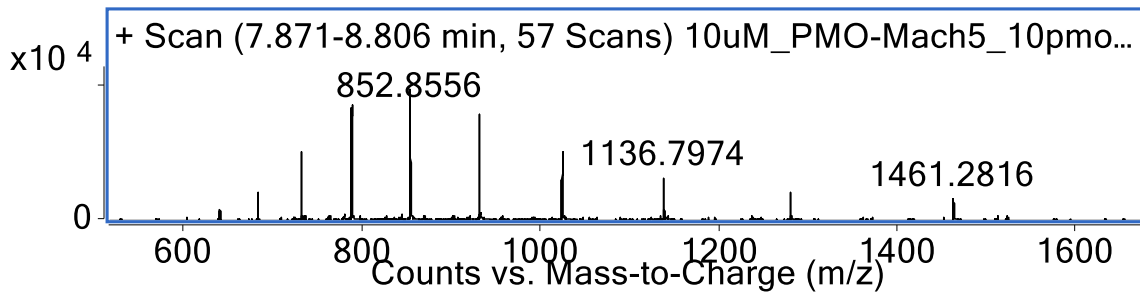

PMO-Mach6 (Method B)

Mass Expected: 12603.4 g/mol

Mass Observed: 12603.4 g/mol

Peptide sequence:

ALKBRSAAKAVRWPKKAIKQASKKVAKYALKXXRKKKAASKXWLQLHWPRW

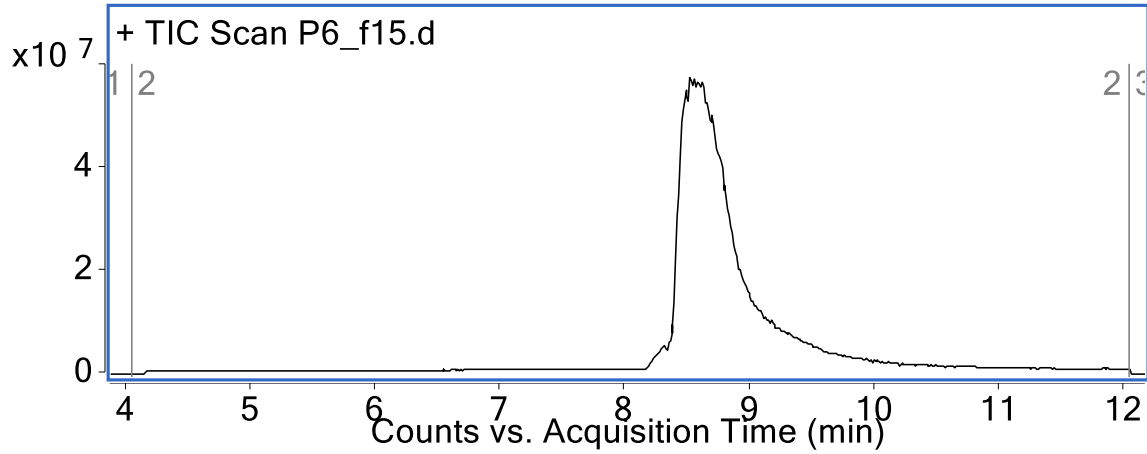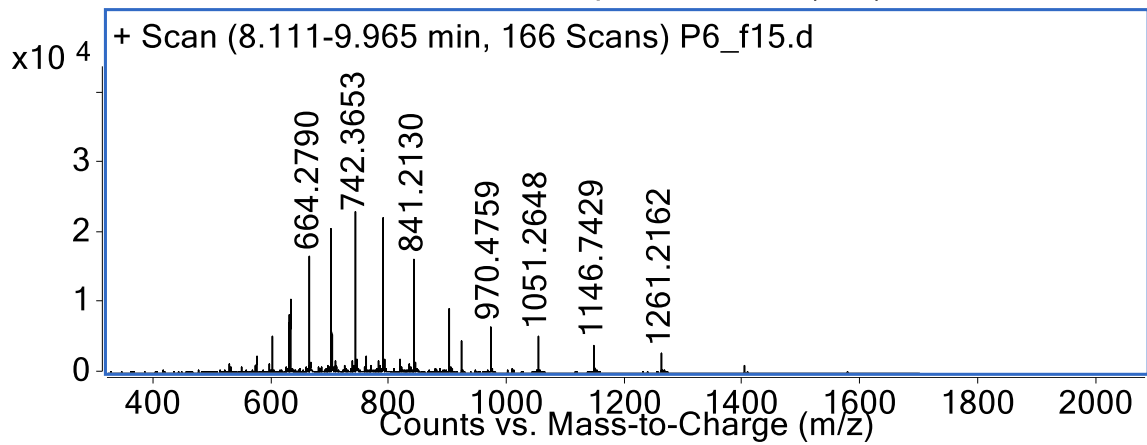

PMO-Mach7 (Method A)

Mass Expected: 12645.4 Da

Mass Observed: 12645.9 Da

Peptide sequence:

XKHPXAVQBAARAWKVPAAALWKKKRLKKSSKQKKKWLWKARSAXKYXRLI

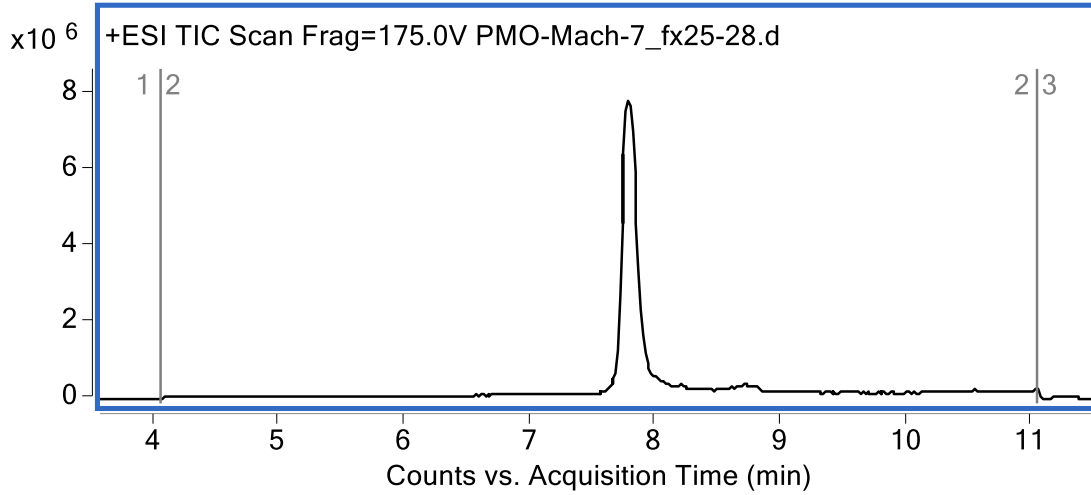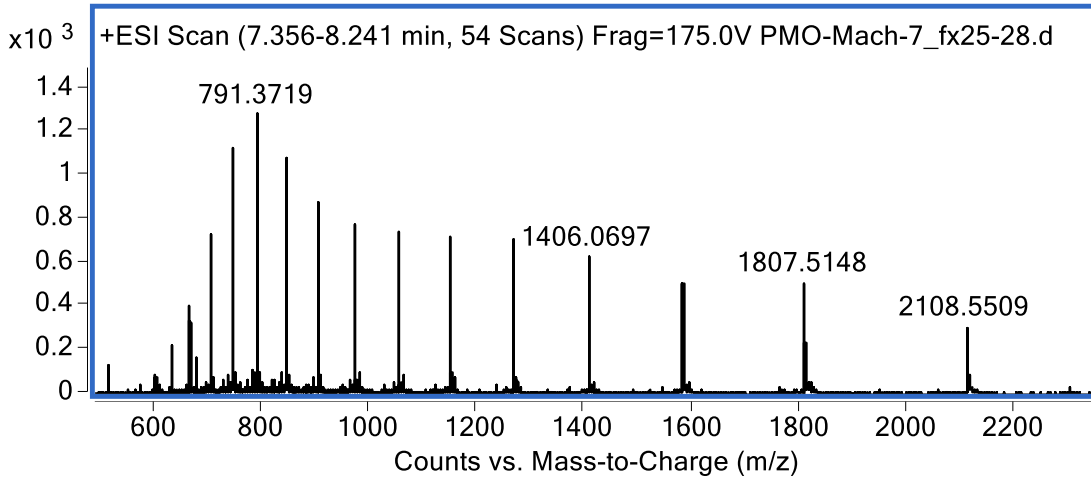

PMO-Mach8 (Method B)

Mass Expected: 15929.1 Da

Mass Observed: 15929.3 Da

Peptide sequence:

BKGKNLLAKIRRGPNNGNBQGSQGYLLYLLXRXRQRXXYPWWRXKHXRWXXRXRG  
HXRRRRQXLKPDRXRGGKGSVS

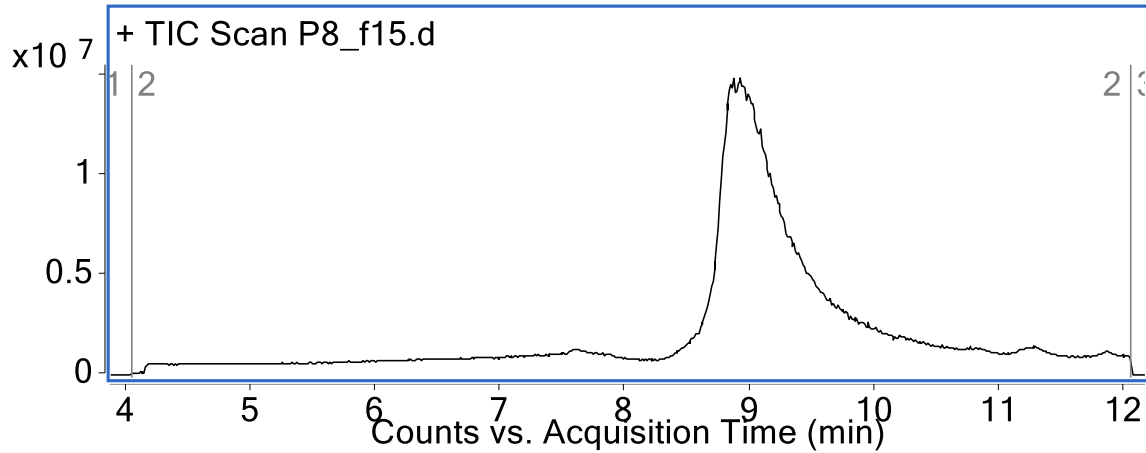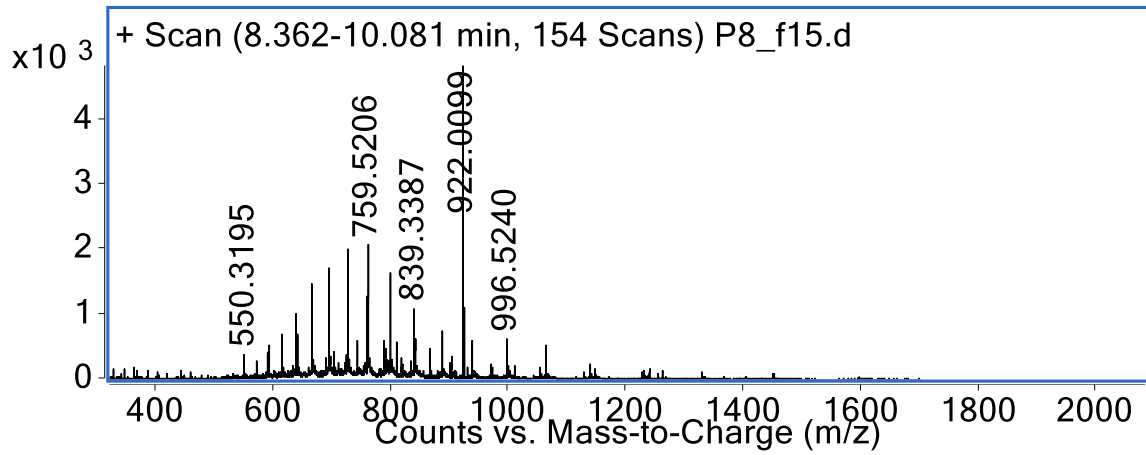

PMO-Mach9 (Method B)

Mass Expected: 14844.8 Da

Mass Observed: 14845.0 Da

Peptide sequence:

KKKKNLNBKSRRGPNGGALQPSQGYLQPLNXRRRQRXXYPWWRXKHXRWRXRYH  
XRRRRQXLKPG

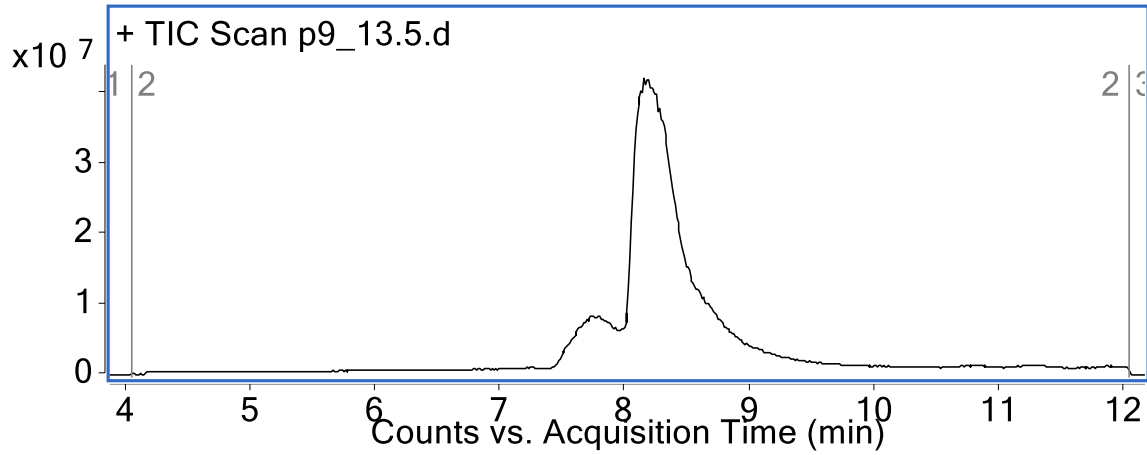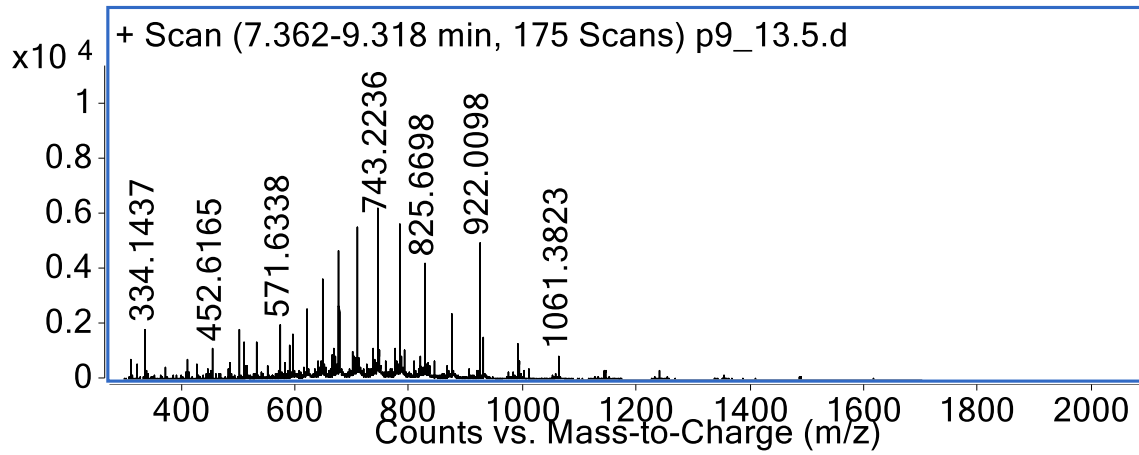

PMO-Mach11 (Method B)

Mass Expected: 11422.8 Da

Mass Observed: 11422.8 Da

Peptide sequence: TSNLKLHLAPPVKKKALKKPLYKAKKKKKVVSPTWXTDQEW

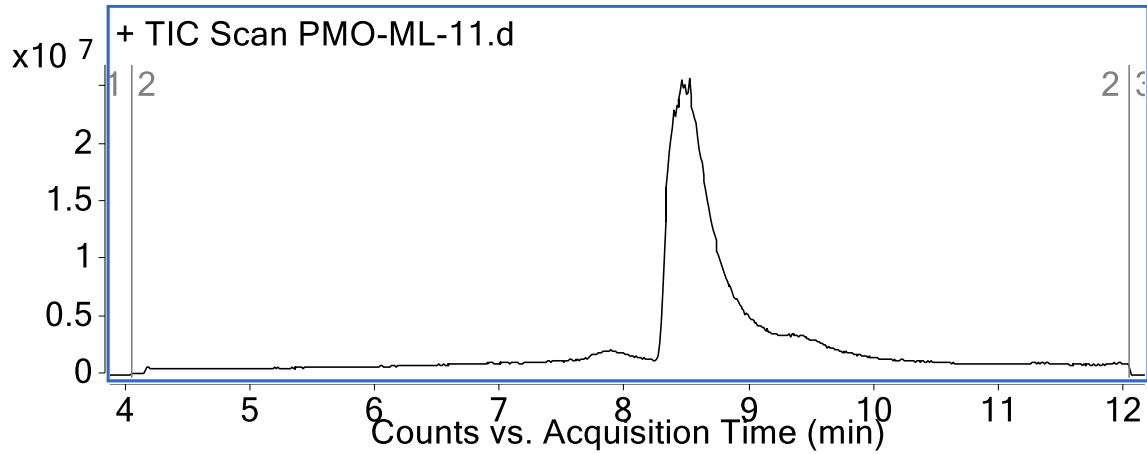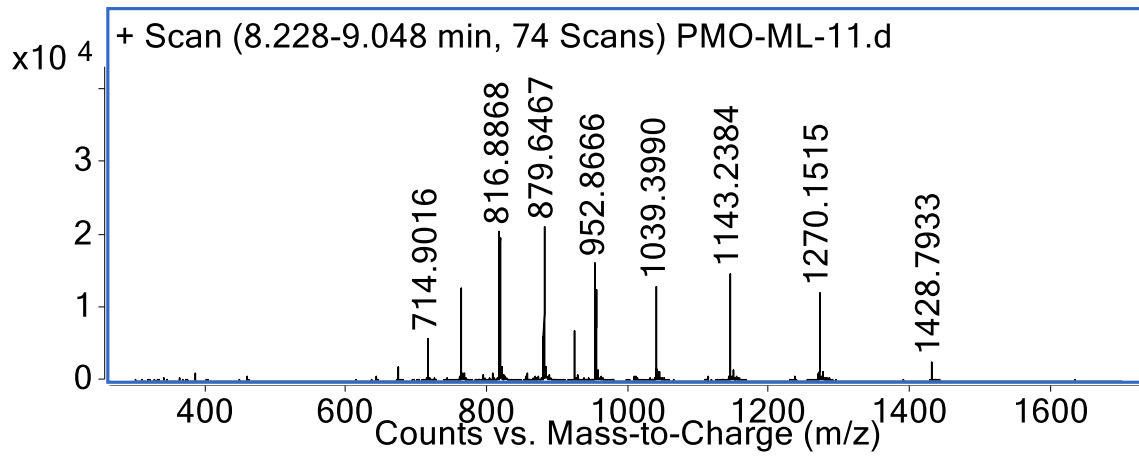



PMO-Mach12 (Method B)

Mass Expected: 16284.5 Da

Mass Observed: 16284.7 Da

Peptide sequence:

KGGKNLAKKIRRGPNNGALQPSQGYLLYLBXR~~RR~~QRXXGPXWRXKHXRWXXXXXR  
PTHXRRRRQXL~~C~~PRXRPR~~C~~RGSVS

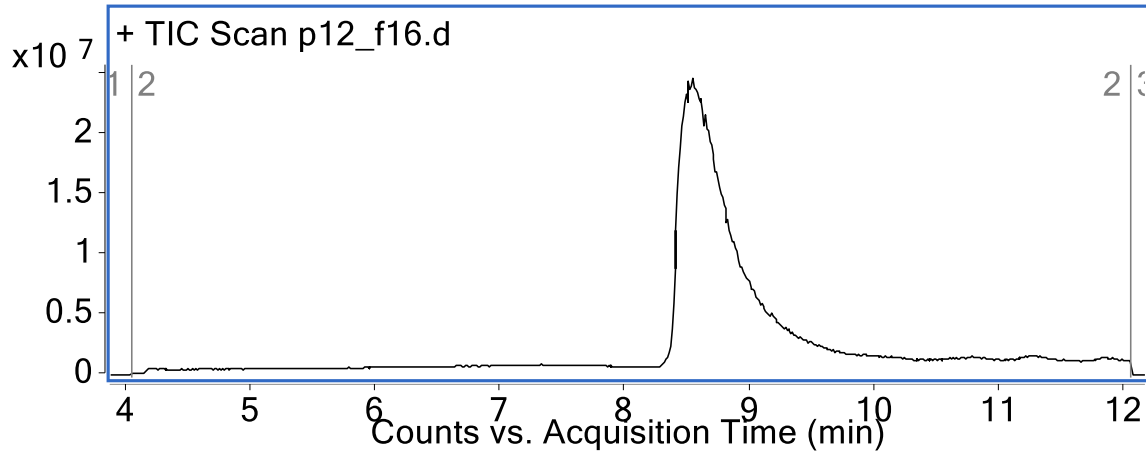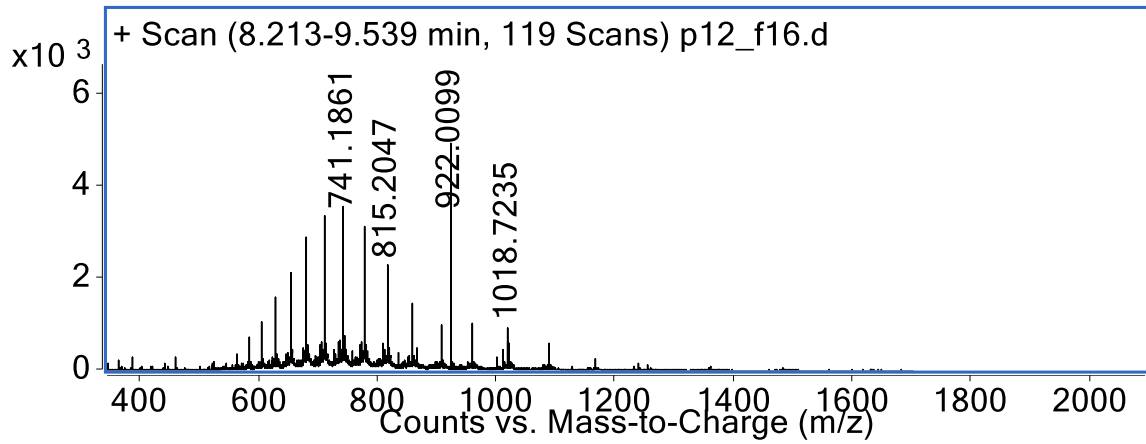

PMO-Mach13 (Method B)

Mass Expected: 13227.8 Da

Mass Observed: 13228.0 Da

Peptide sequence:

AKKKKLGBKALRWPNGKCPQPKEKCPKYLLGRXRRKRXRYPWWRXKHRRW

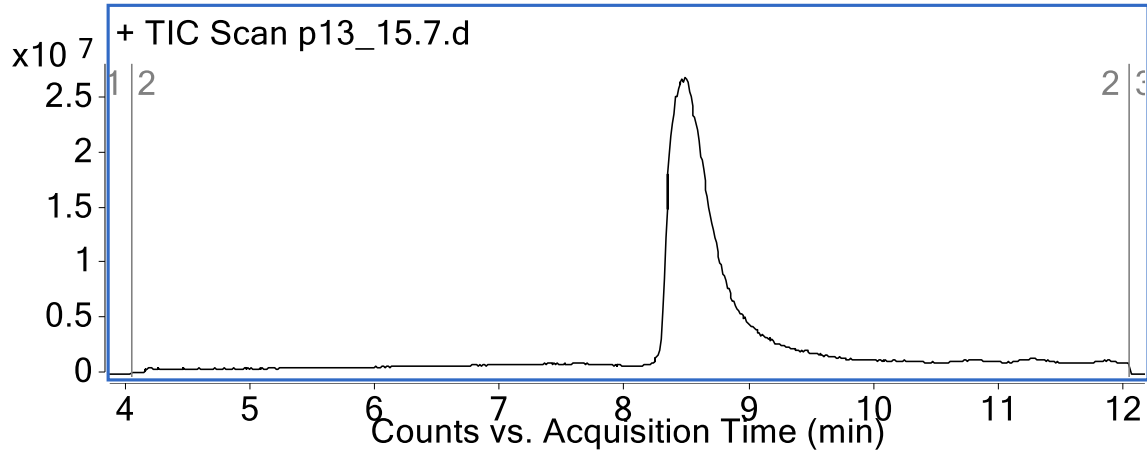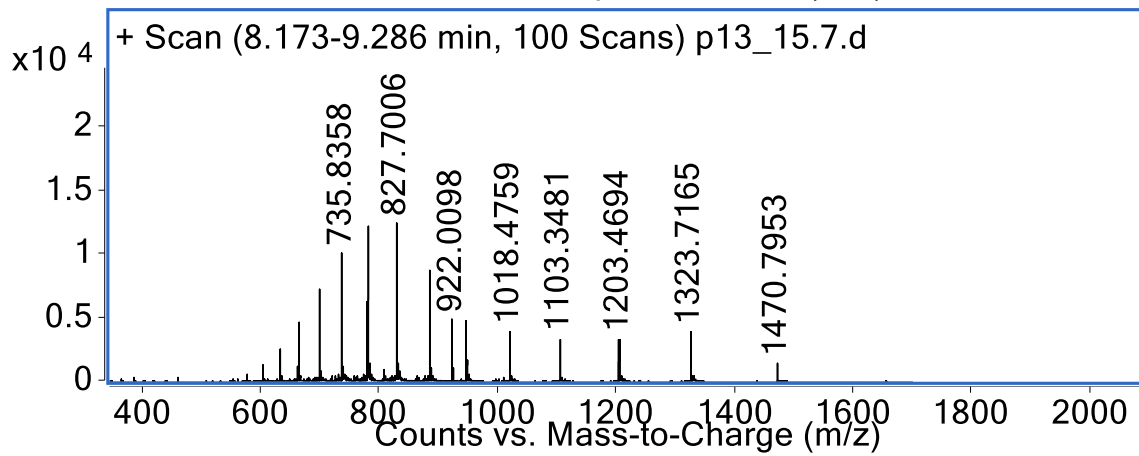

PNA-Mach2 (Method B)  
Mass Expected: 11375.5 Da  
Mass Observed: 11374.9 Da

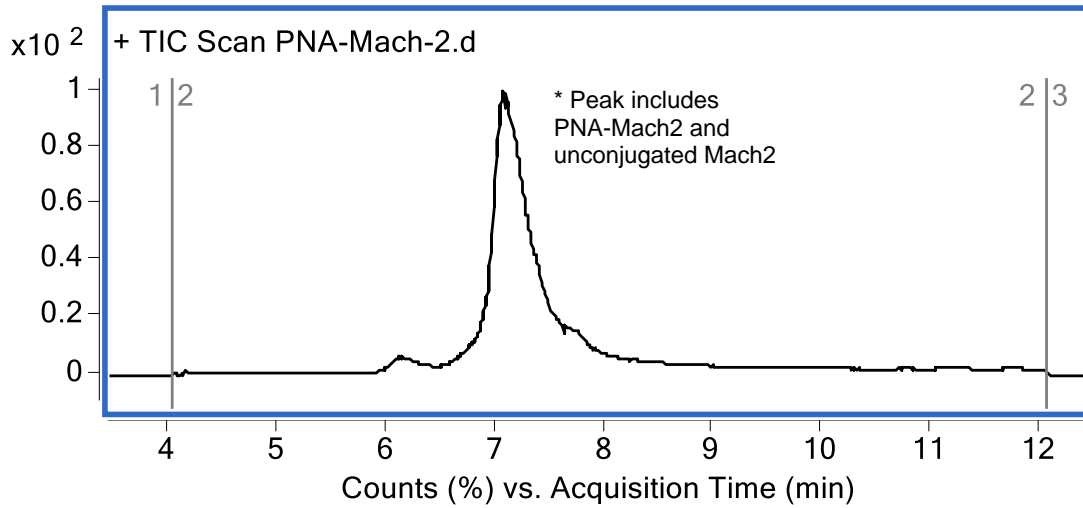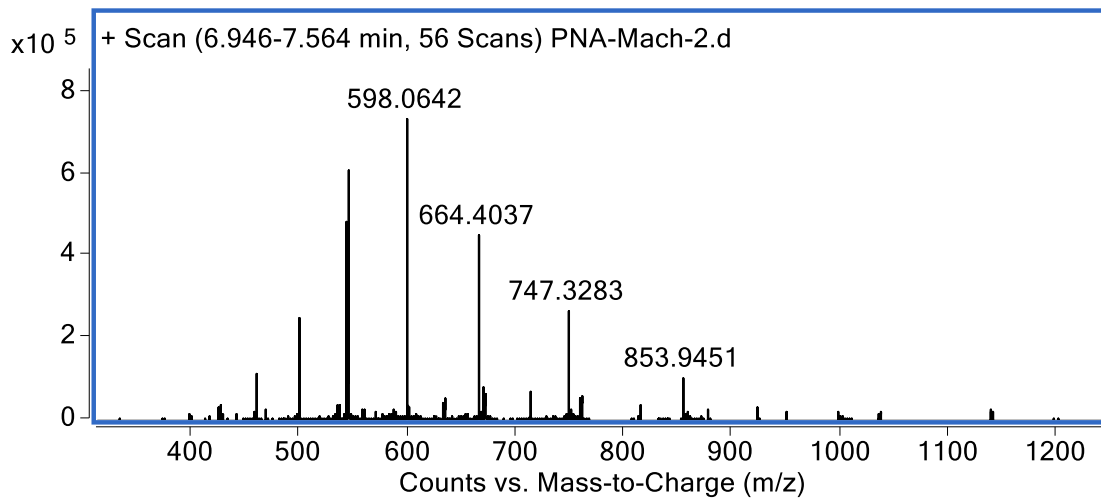

PNA-Mach3 (Method A)  
Mass Expected: 10200.0 Da  
Mass Observed: 10200.6 Da

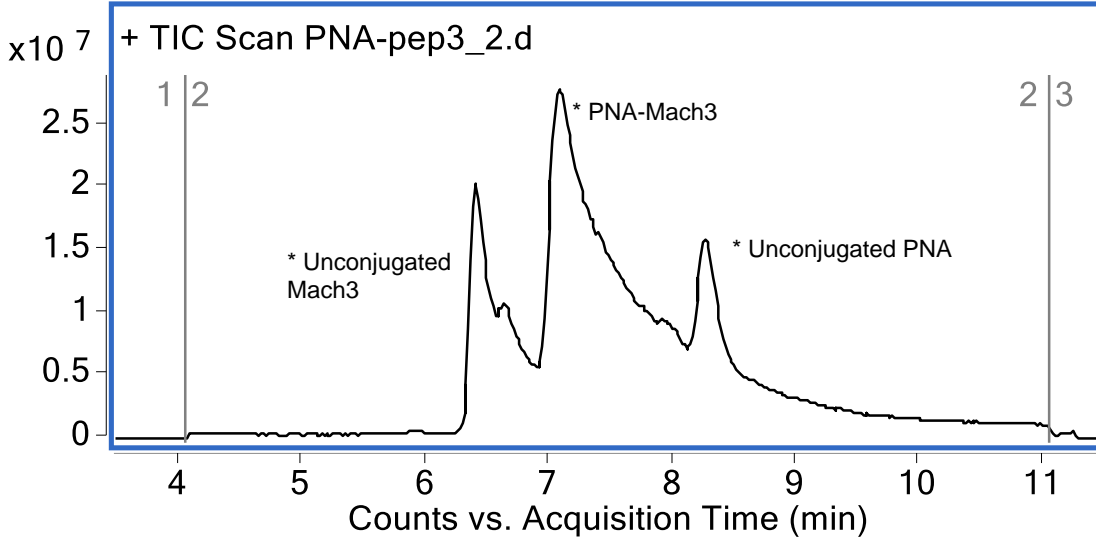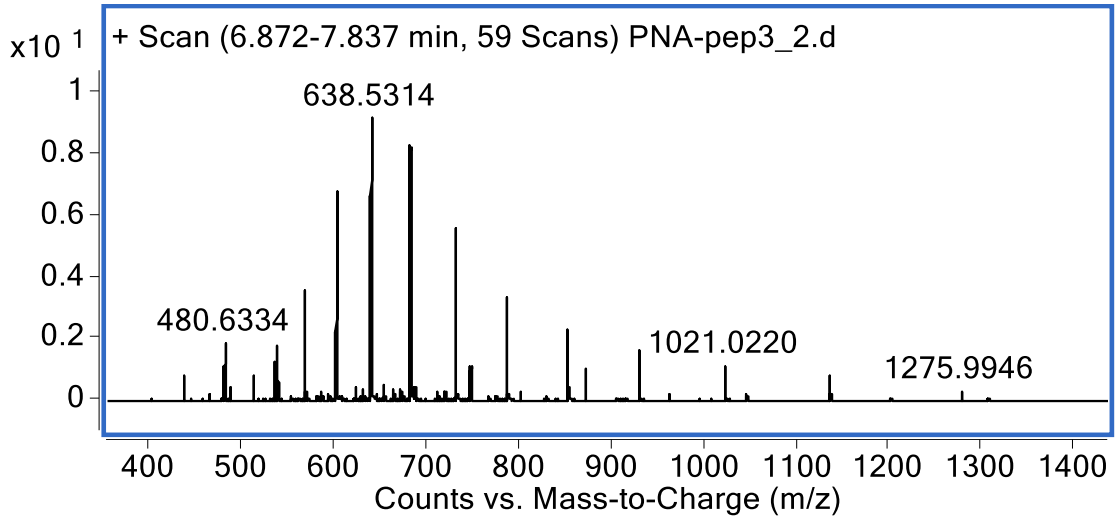

PNA-Mach4 (Method B)

Mass Expected: 9498.4 Da

Mass Observed: 9497.8 Da

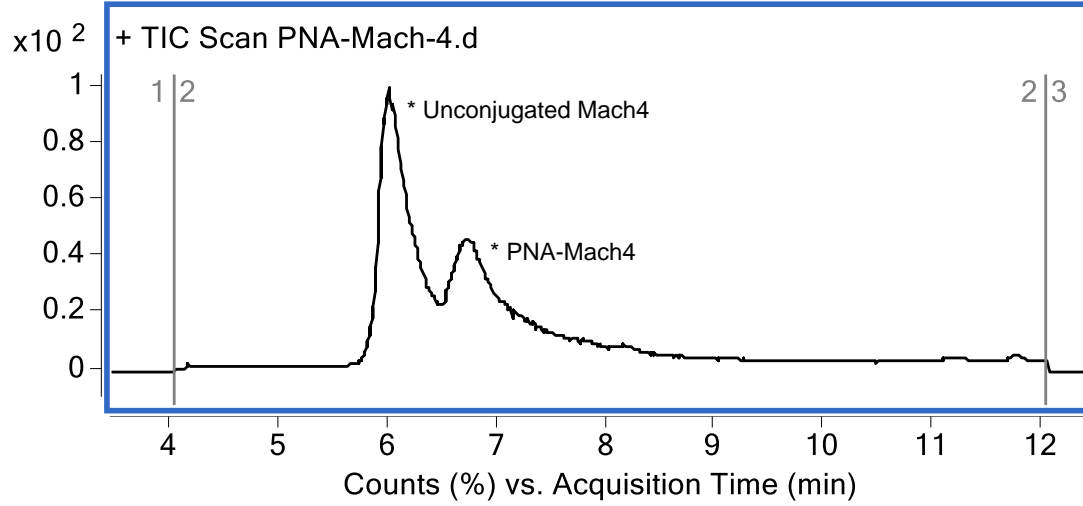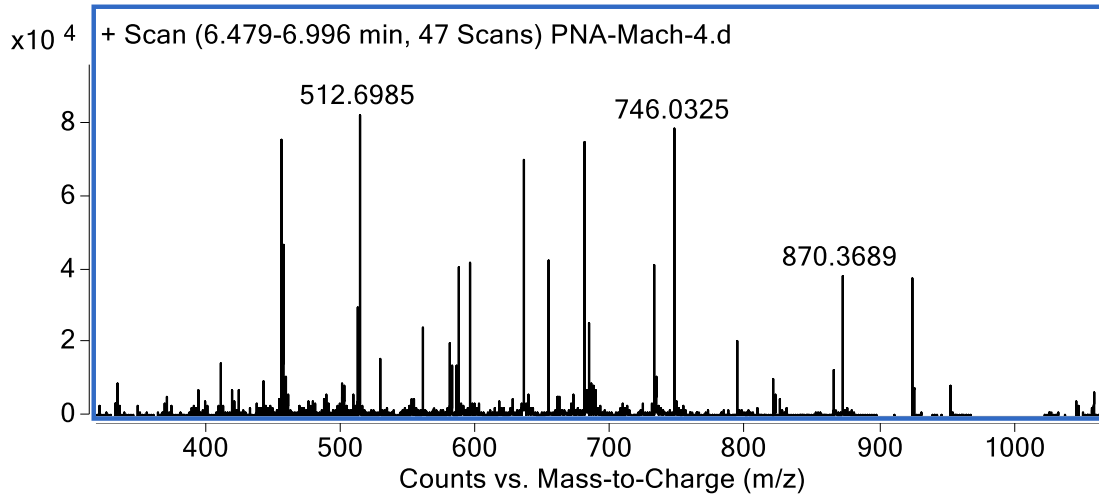

PNA-Mach7 (Method B)  
Mass Expected: 11521.8 Da  
Mass Observed: 11521.3 Da

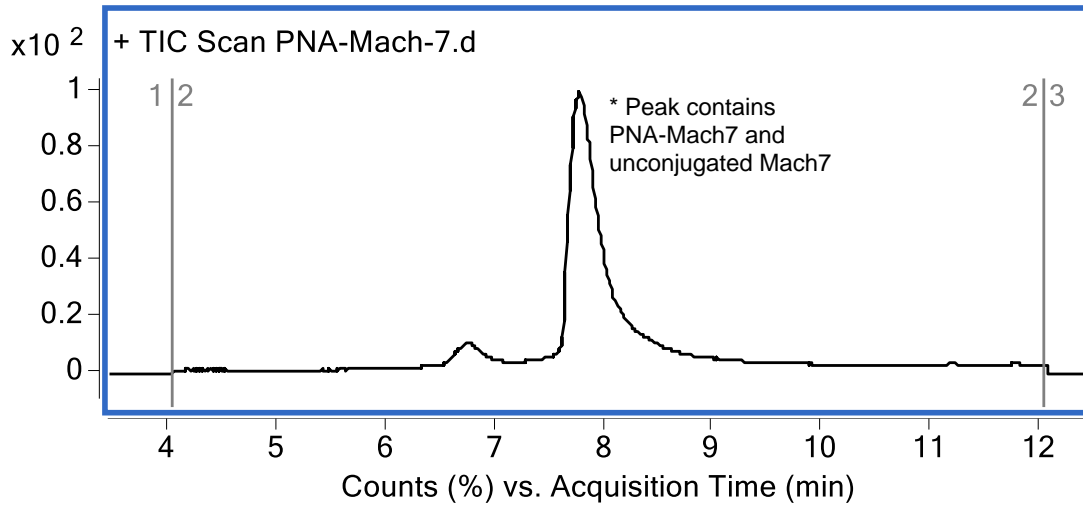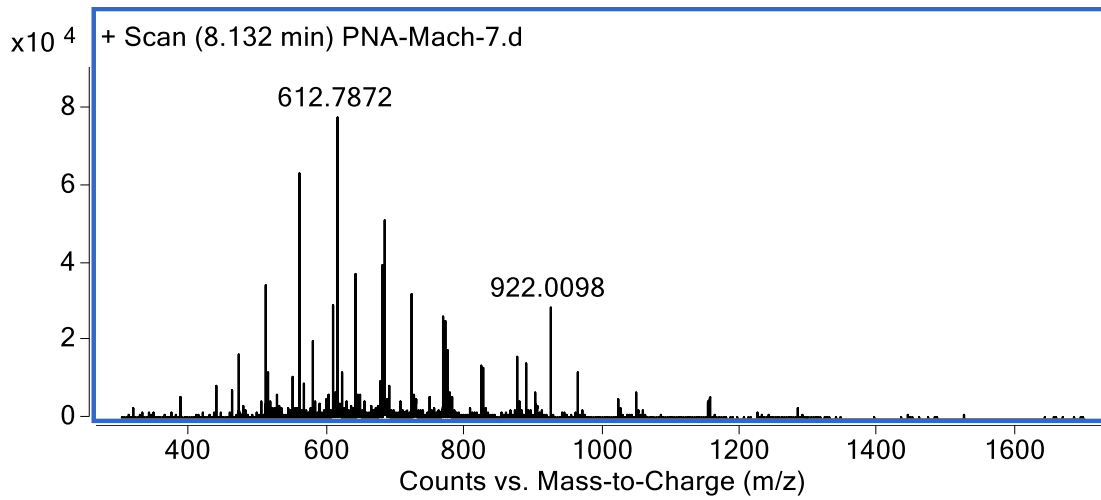

G5-DTA(C186S) (Method A)

Mass Expected: 21376.8 Da

Mass Observed: 21377.2 Da

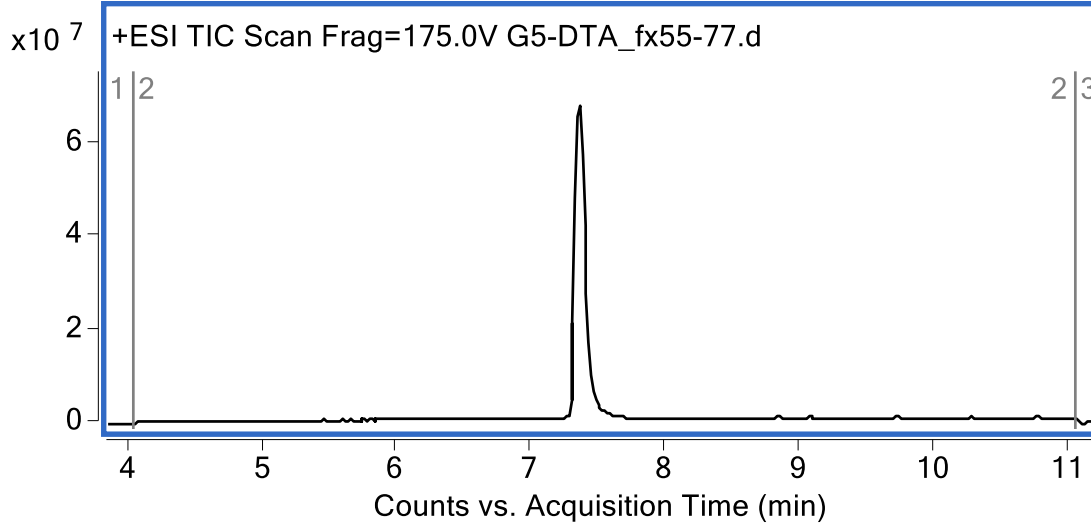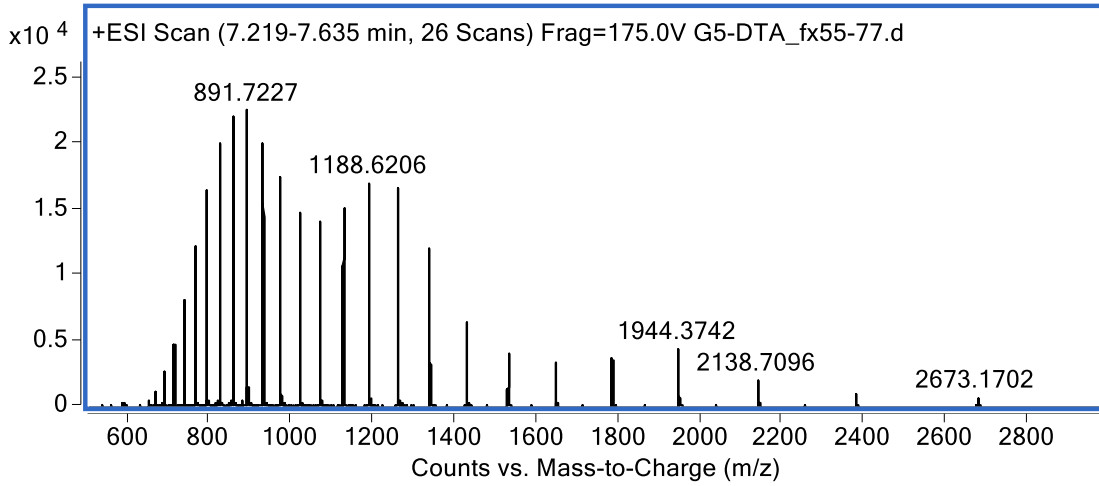

G5-DTA(C186S, E148S) (Method A)

Mass Expected: 21334.6 Da

Mass Observed: 21335.3 Da

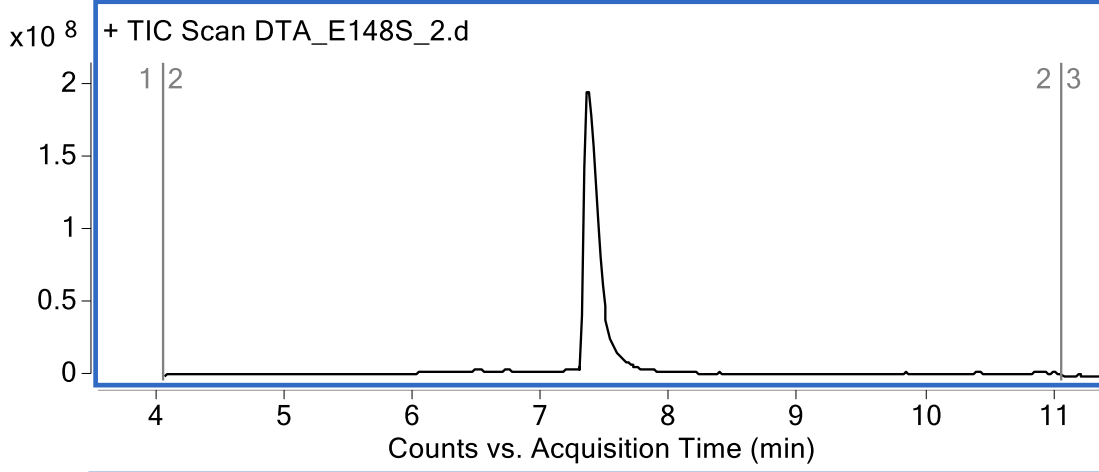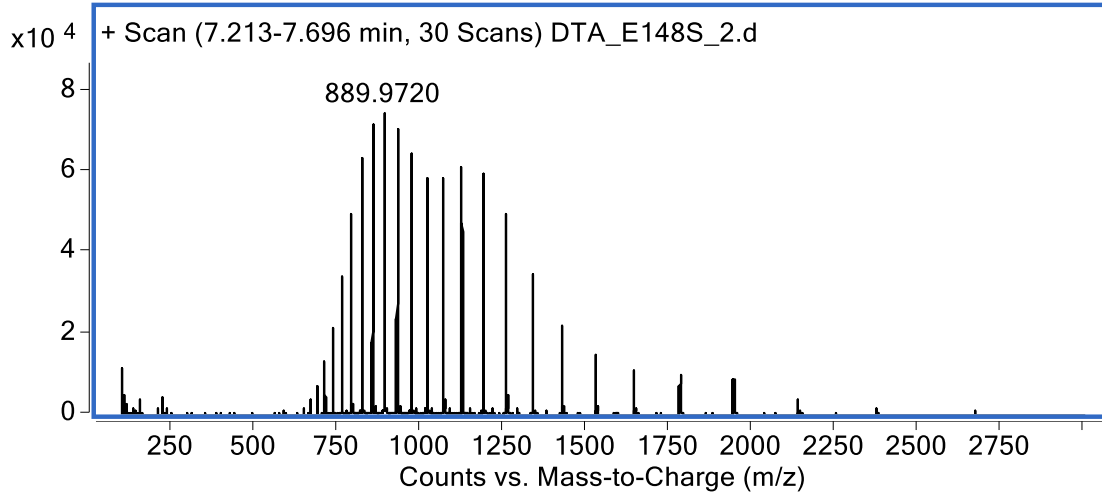



Mach3-DTA(C186S) (Method A)

Mass Expected: 26428.7 Da

Mass Observed: 26432.0 Da

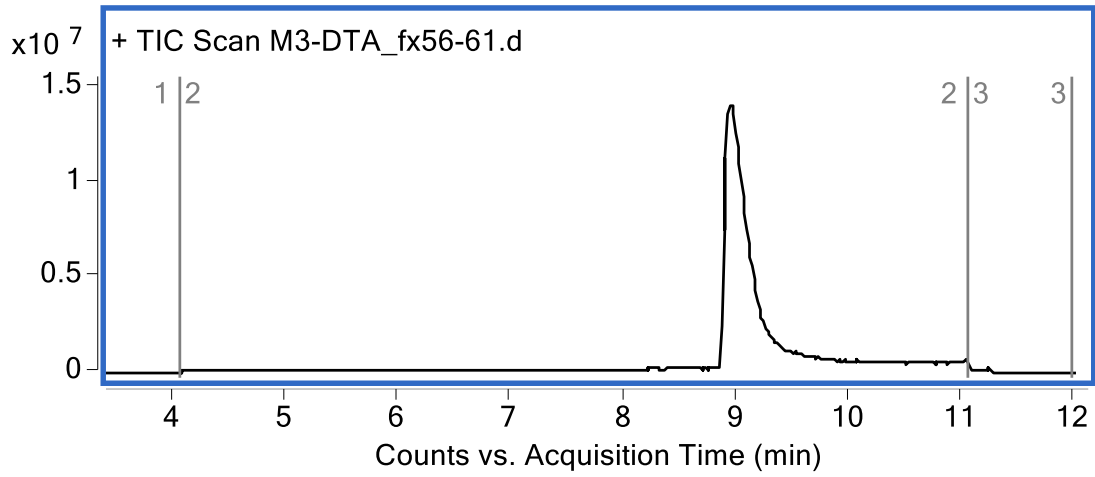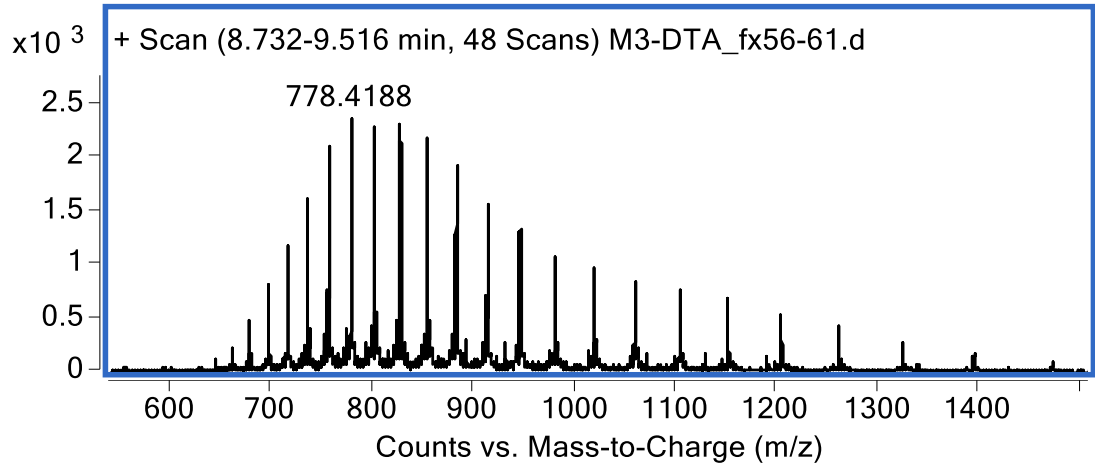

Mach3-DTA(C186S, E148S) (Method B)

Mass Expected: 26386.7 Da

Mass Observed: 26388.2 Da

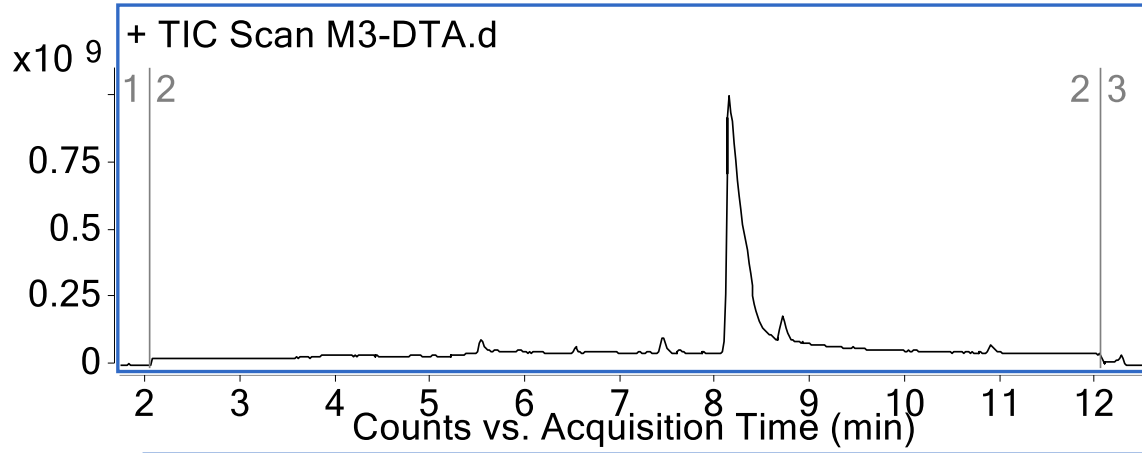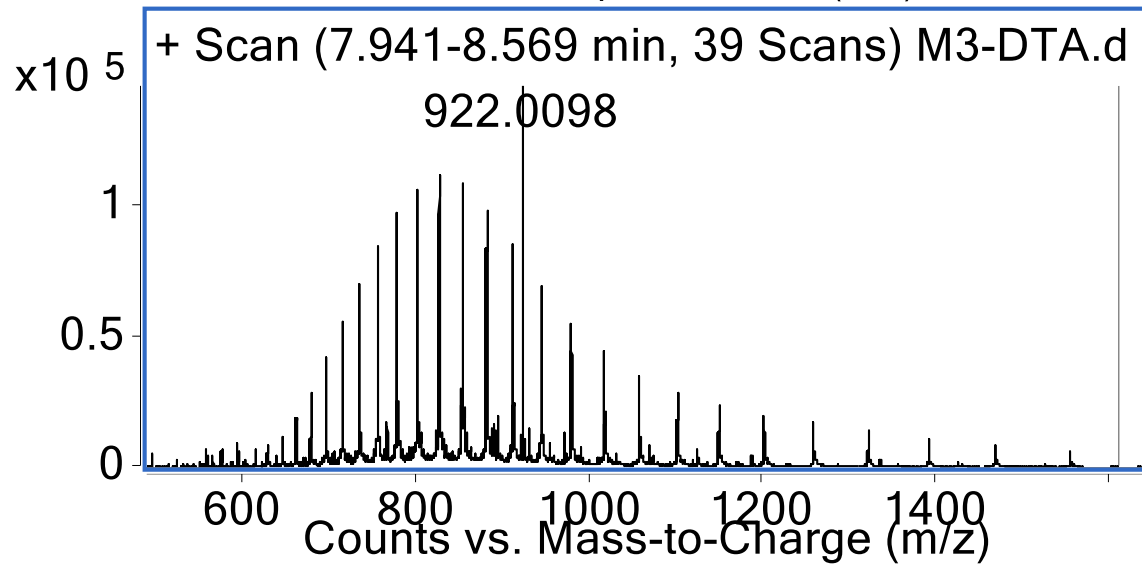

Mach7-DTA(C186S) (Method A)

Mass Expected: 27750.5 Da

Mass Observed: 27755.1 Da

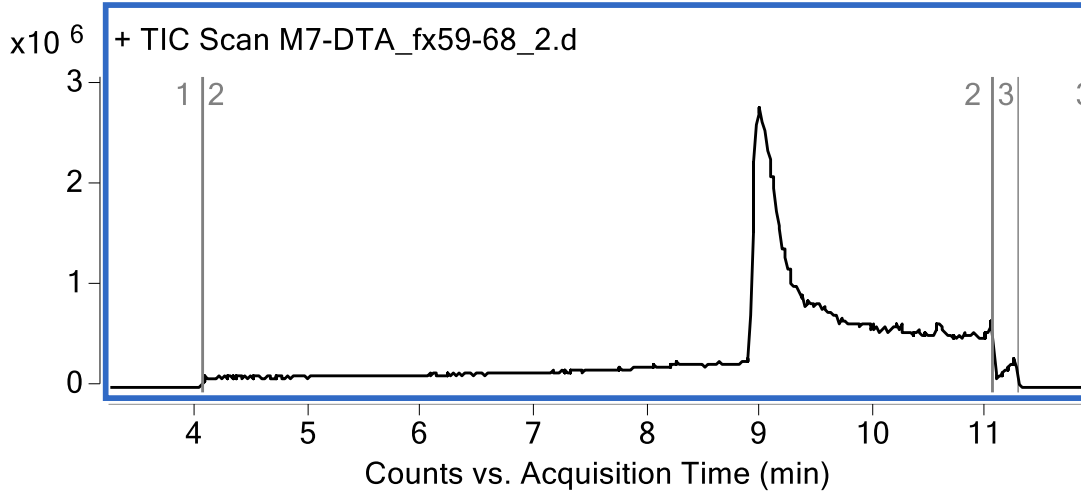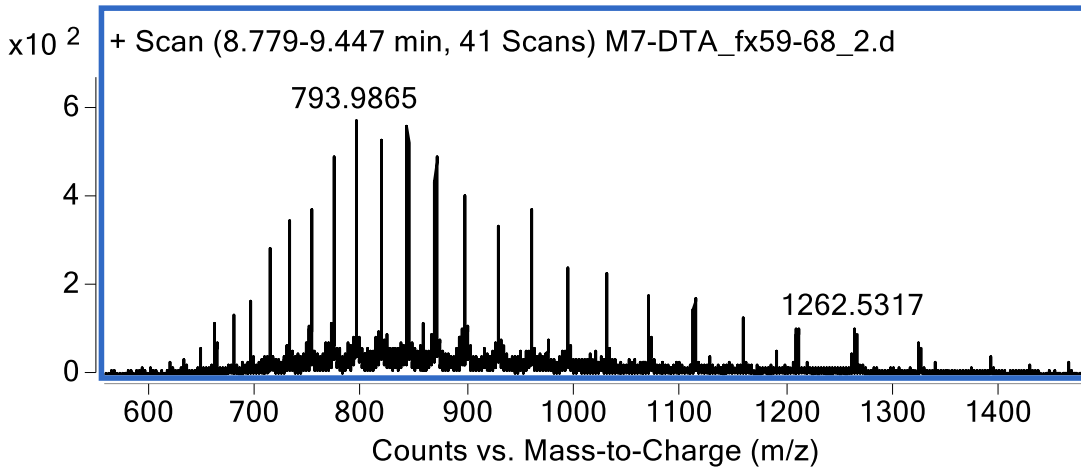

Mach7-DTA(C186S, E148S) (Method B)

Mass Expected: 27708.5 Da

Mass Observed: 27710.1 Da

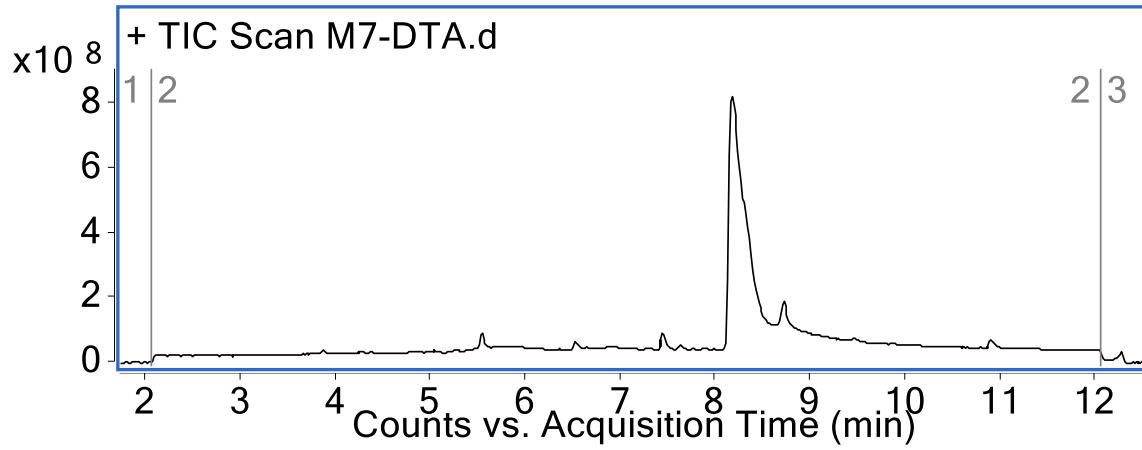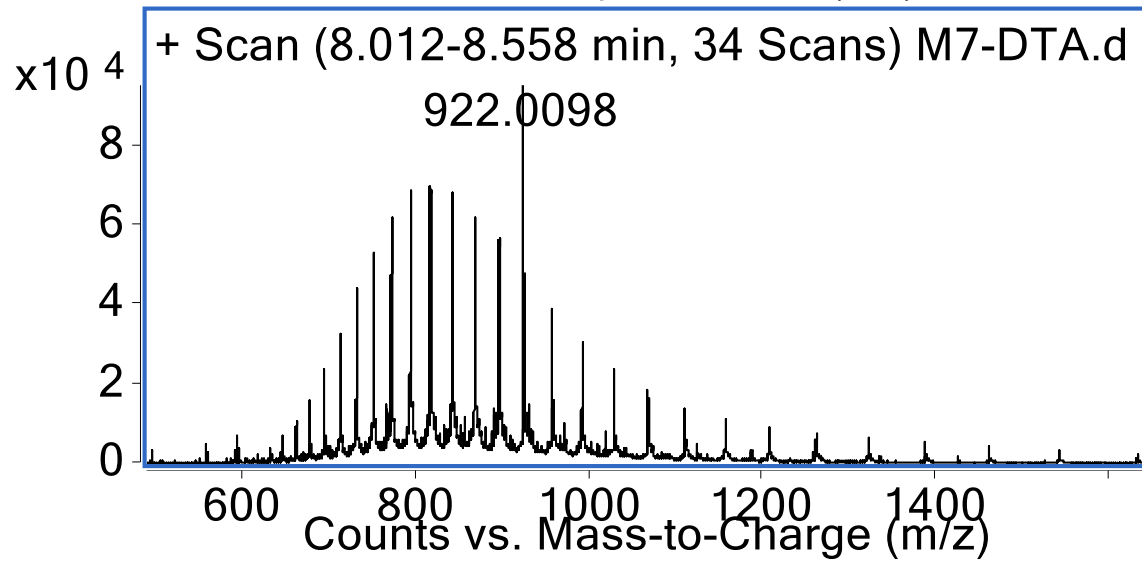

G5-EGFP (Method A)

Mass Expected: 28754.4 Da

Mass Observed: 28754.8 Da

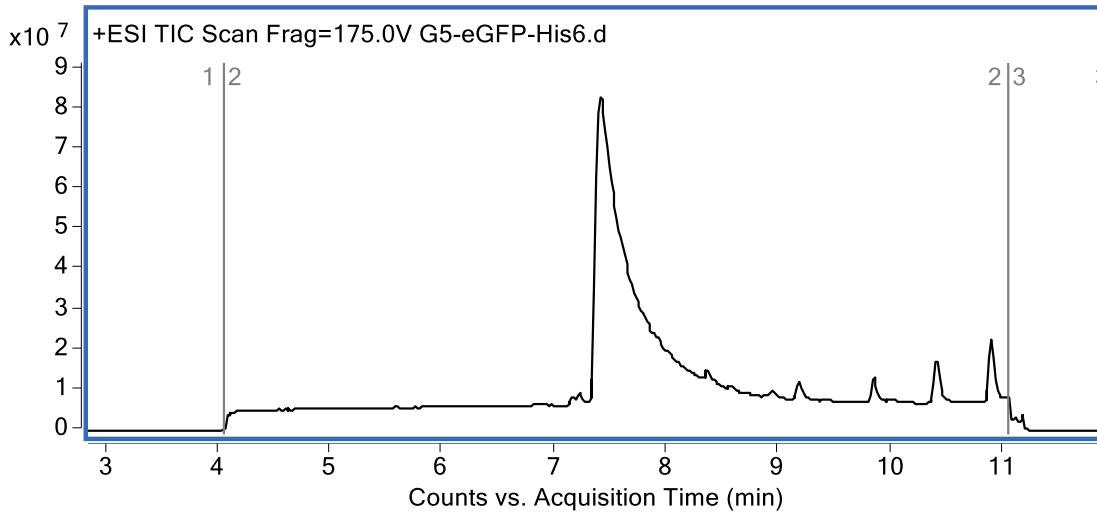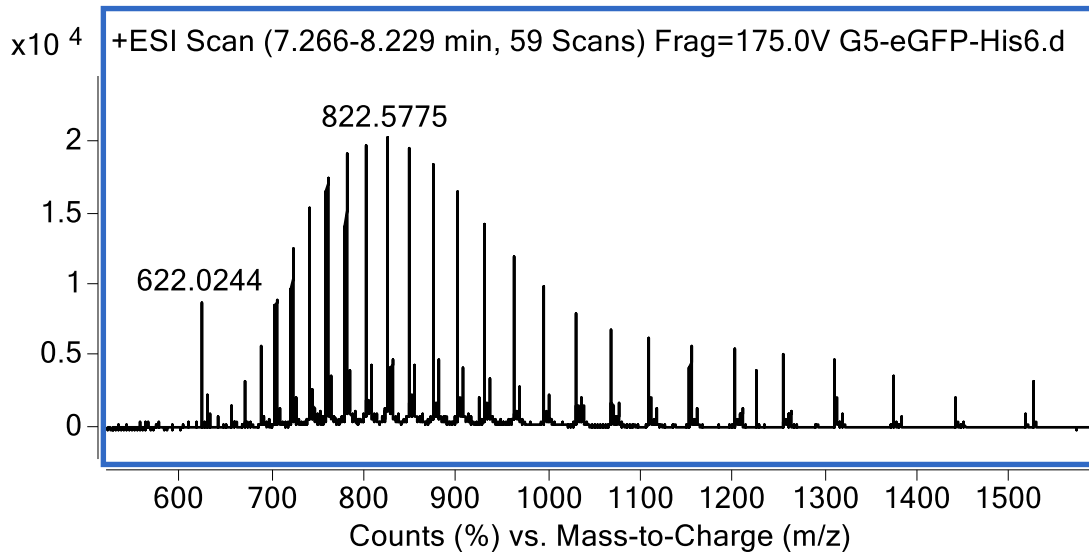

Mach3-EGFP (Method B)  
Mass Expected: 33806.5 Da  
Mass Observed: 33807.3 Da

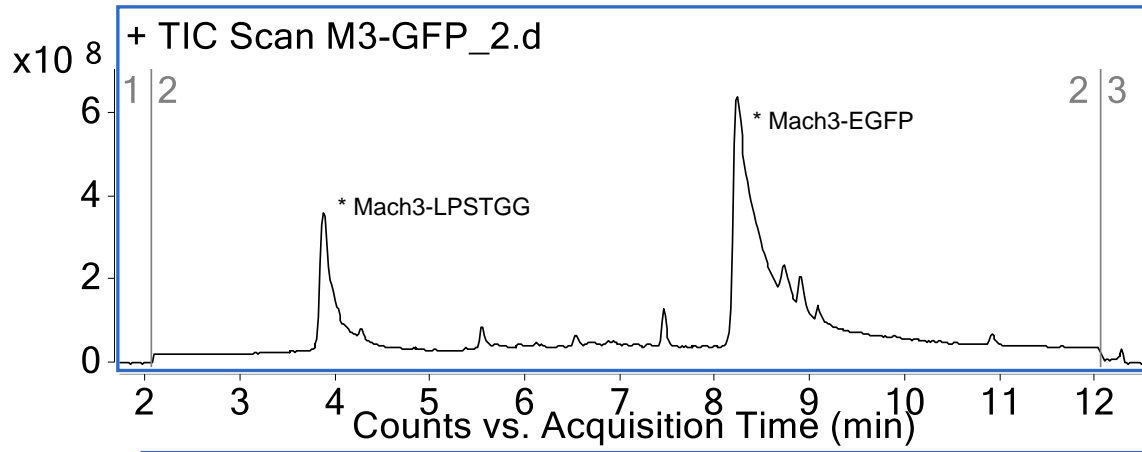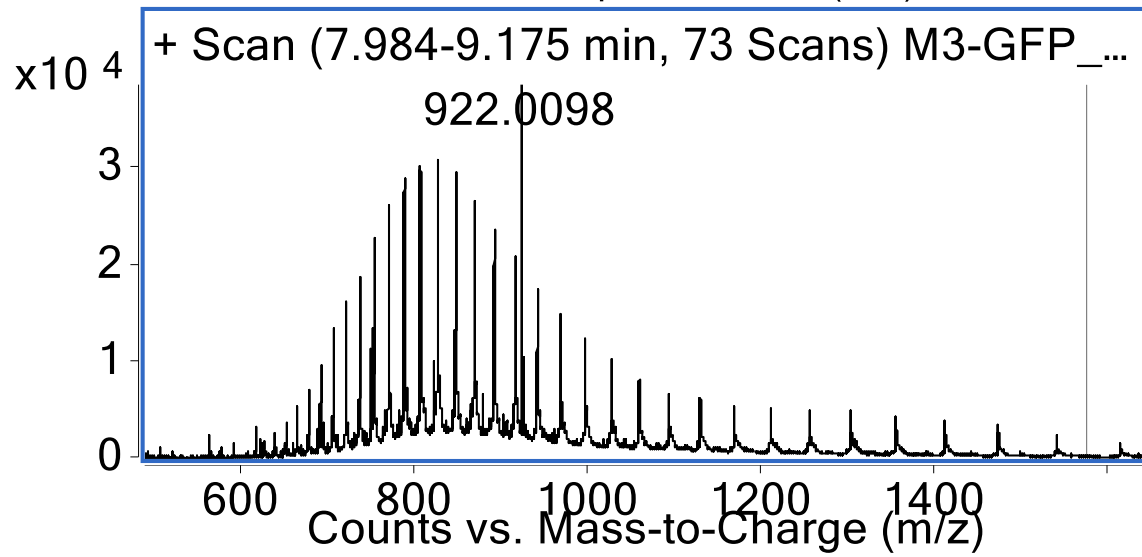

Mach7-EGFP (Method B)  
Mass Expected: 35128.3 Da  
Mass Observed: 35130.3 Da

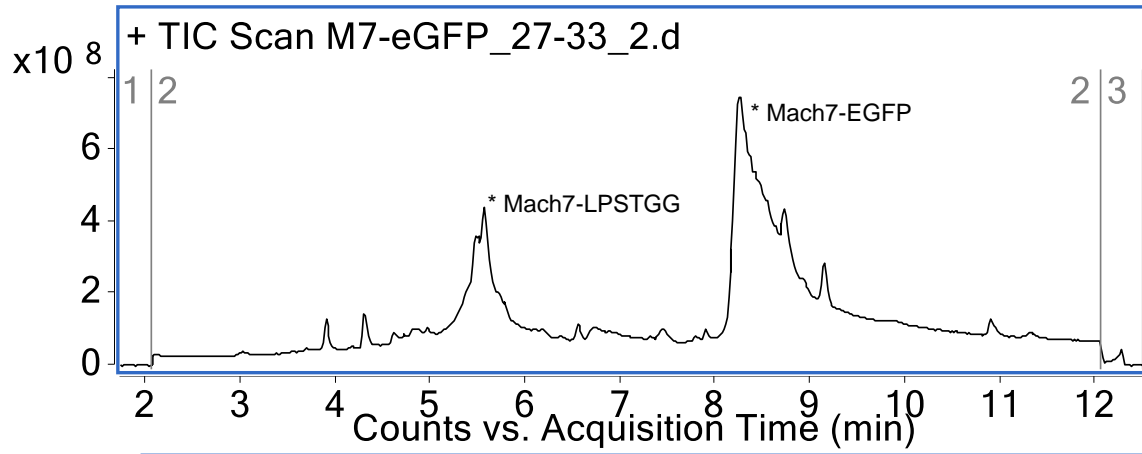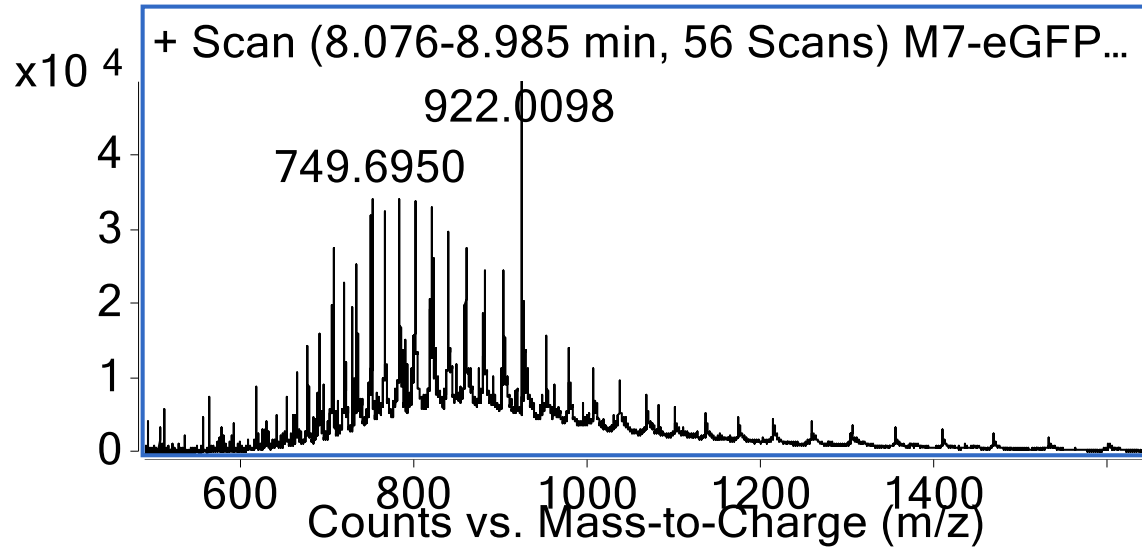

## Appendix 2 Topological fingerprints

CB\_Index = Condensed Bit-vector index, used in the figures in Manuscript and SI

TF\_Index = Topological Fingerprint index, for the corresponding CB\_index

All ON bits out of the 2048-bits have been represented in the following set of figures. The radius of exploration goes from 0 (atom, itself) to 3 nearest neighbors. The coloring scheme denotes the node atom in blue, atoms which are a part of an aromatic ring in yellow, connected neighbors as a part of the topological exploration in black, and the unexplored neighboring atoms and nodes in gray.

| CB_Index | TF_Index | CB_Index | TF_Index | CB_Index | TF_Index | CB_Index | TF_Index |
|----------|----------|----------|----------|----------|----------|----------|----------|
| 1        | 1        | 51       | 585      | 101      | 1114     | 151      | 1693     |
| 2        | 11       | 52       | 623      | 102      | 1117     | 152      | 1719     |
| 3        | 22       | 53       | 625      | 103      | 1127     | 153      | 1731     |
| 4        | 27       | 54       | 650      | 104      | 1139     | 154      | 1736     |
| 5        | 32       | 55       | 667      | 105      | 1141     | 155      | 1737     |
| 6        | 67       | 56       | 671      | 106      | 1143     | 156      | 1750     |
| 7        | 70       | 57       | 680      | 107      | 1145     | 157      | 1751     |
| 8        | 74       | 58       | 708      | 108      | 1152     | 158      | 1752     |
| 9        | 79       | 59       | 713      | 109      | 1158     | 159      | 1754     |
| 10       | 80       | 60       | 724      | 110      | 1171     | 160      | 1758     |
| 11       | 119      | 61       | 727      | 111      | 1185     | 161      | 1773     |
| 12       | 132      | 62       | 739      | 112      | 1199     | 162      | 1778     |
| 13       | 140      | 63       | 742      | 113      | 1213     | 163      | 1783     |
| 14       | 150      | 64       | 745      | 114      | 1221     | 164      | 1785     |
| 15       | 173      | 65       | 759      | 115      | 1226     | 165      | 1791     |
| 16       | 197      | 66       | 776      | 116      | 1258     | 166      | 1794     |
| 17       | 204      | 67       | 784      | 117      | 1259     | 167      | 1805     |
| 18       | 220      | 68       | 785      | 118      | 1267     | 168      | 1840     |
| 19       | 222      | 69       | 786      | 119      | 1268     | 169      | 1844     |
| 20       | 227      | 70       | 806      | 120      | 1283     | 170      | 1847     |
| 21       | 229      | 71       | 807      | 121      | 1287     | 171      | 1849     |
| 22       | 231      | 72       | 831      | 122      | 1290     | 172      | 1873     |
| 23       | 272      | 73       | 857      | 123      | 1301     | 173      | 1876     |
| 24       | 280      | 74       | 878      | 124      | 1307     | 174      | 1879     |
| 25       | 283      | 75       | 889      | 125      | 1313     | 175      | 1882     |
| 26       | 289      | 76       | 894      | 126      | 1325     | 176      | 1898     |
| 27       | 293      | 77       | 900      | 127      | 1349     | 177      | 1910     |
| 28       | 294      | 78       | 926      | 128      | 1357     | 178      | 1911     |
| 29       | 295      | 79       | 931      | 129      | 1380     | 179      | 1912     |
| 30       | 305      | 80       | 955      | 130      | 1388     | 180      | 1917     |
| 31       | 310      | 81       | 966      | 131      | 1427     | 181      | 1926     |
| 32       | 321      | 82       | 971      | 132      | 1431     | 182      | 1928     |
| 33       | 328      | 83       | 981      | 133      | 1451     | 183      | 1937     |
| 34       | 329      | 84       | 983      | 134      | 1452     | 184      | 1946     |
| 35       | 362      | 85       | 989      | 135      | 1459     | 185      | 1947     |
| 36       | 364      | 86       | 1014     | 136      | 1462     | 186      | 1969     |
| 37       | 368      | 87       | 1017     | 137      | 1507     | 187      | 1970     |
| 38       | 376      | 88       | 1019     | 138      | 1517     | 188      | 2006     |
| 39       | 378      | 89       | 1022     | 139      | 1544     | 189      | 2013     |
| 40       | 389      | 90       | 1027     | 140      | 1547     | 190      | 2022     |
| 41       | 394      | 91       | 1028     | 141      | 1558     | 191      | 2042     |
| 42       | 412      | 92       | 1031     | 142      | 1564     |          |          |
| 43       | 420      | 93       | 1034     | 143      | 1573     |          |          |
| 44       | 425      | 94       | 1057     | 144      | 1601     |          |          |
| 45       | 473      | 95       | 1066     | 145      | 1602     |          |          |
| 46       | 482      | 96       | 1072     | 146      | 1607     |          |          |
| 47       | 545      | 97       | 1082     | 147      | 1633     |          |          |
| 48       | 553      | 98       | 1088     | 148      | 1656     |          |          |
| 49       | 561      | 99       | 1104     | 149      | 1661     |          |          |
| 50       | 575      | 100      | 1110     | 150      | 1685     |          |          |



## Linker 2

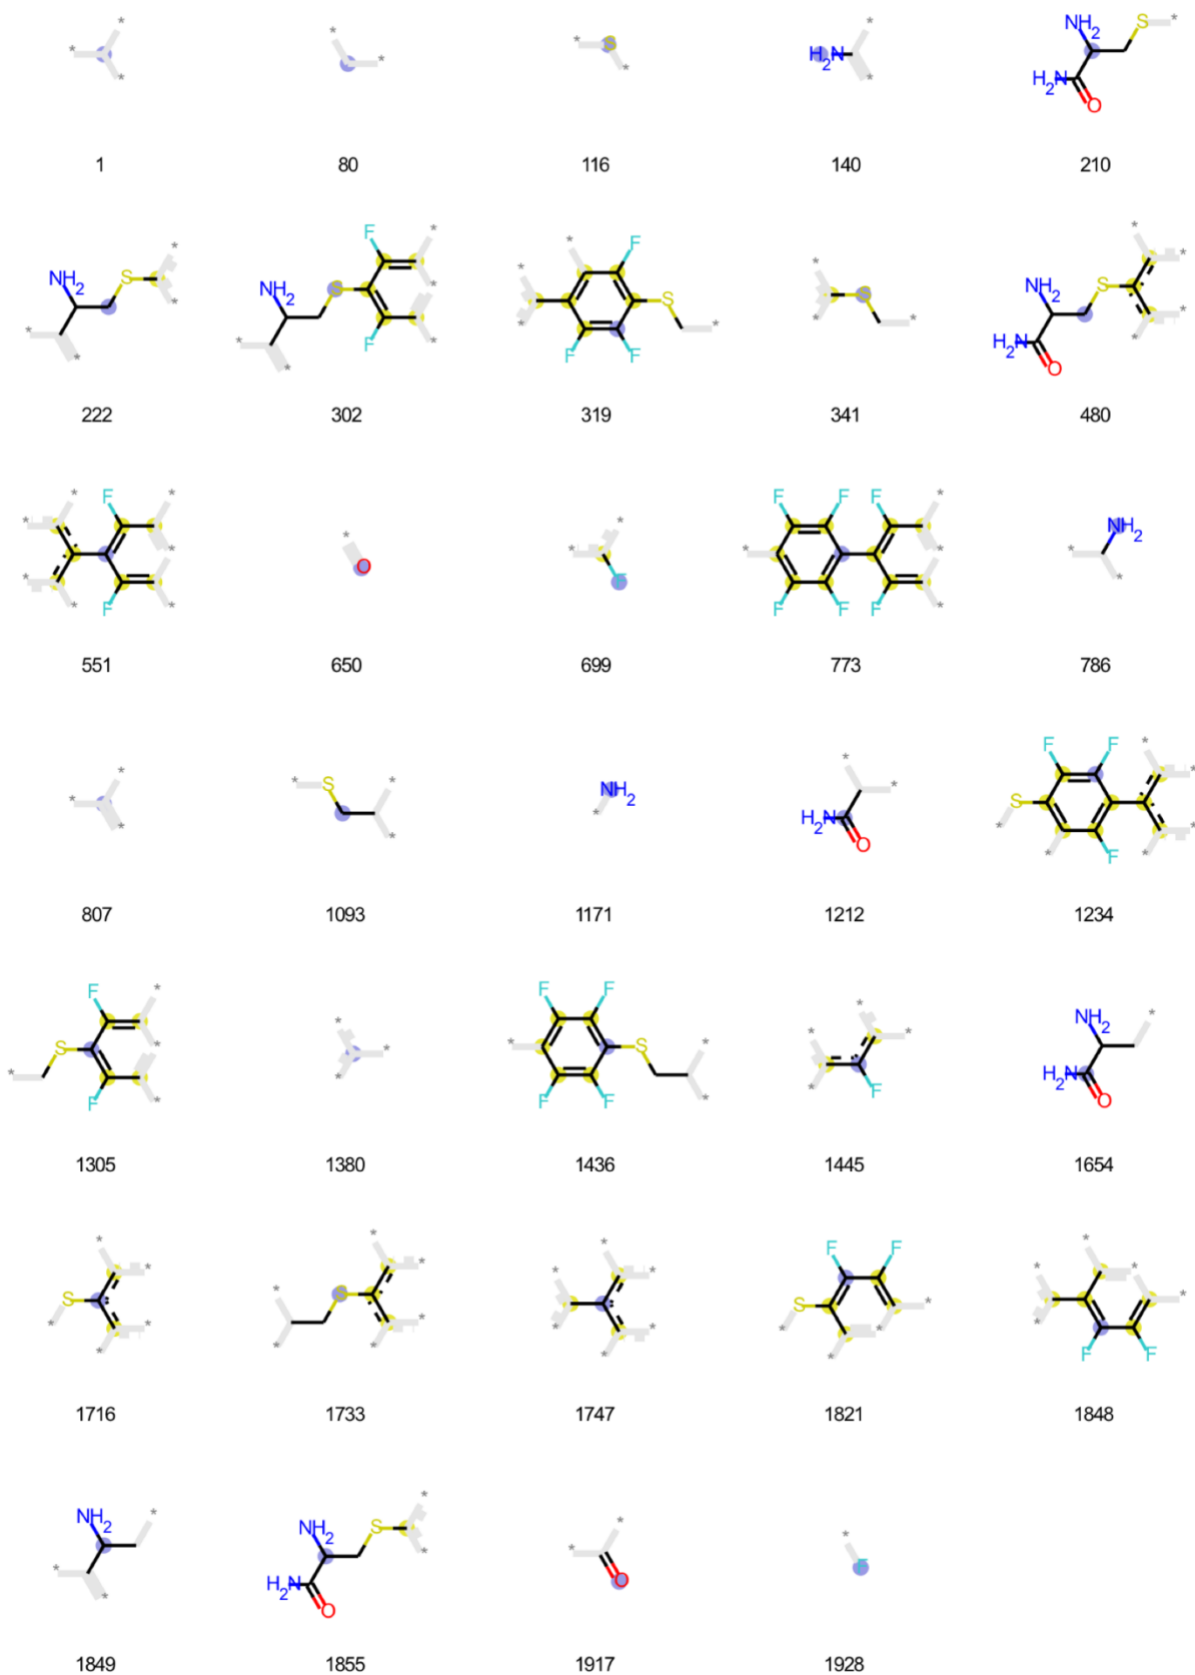

# Linker 3

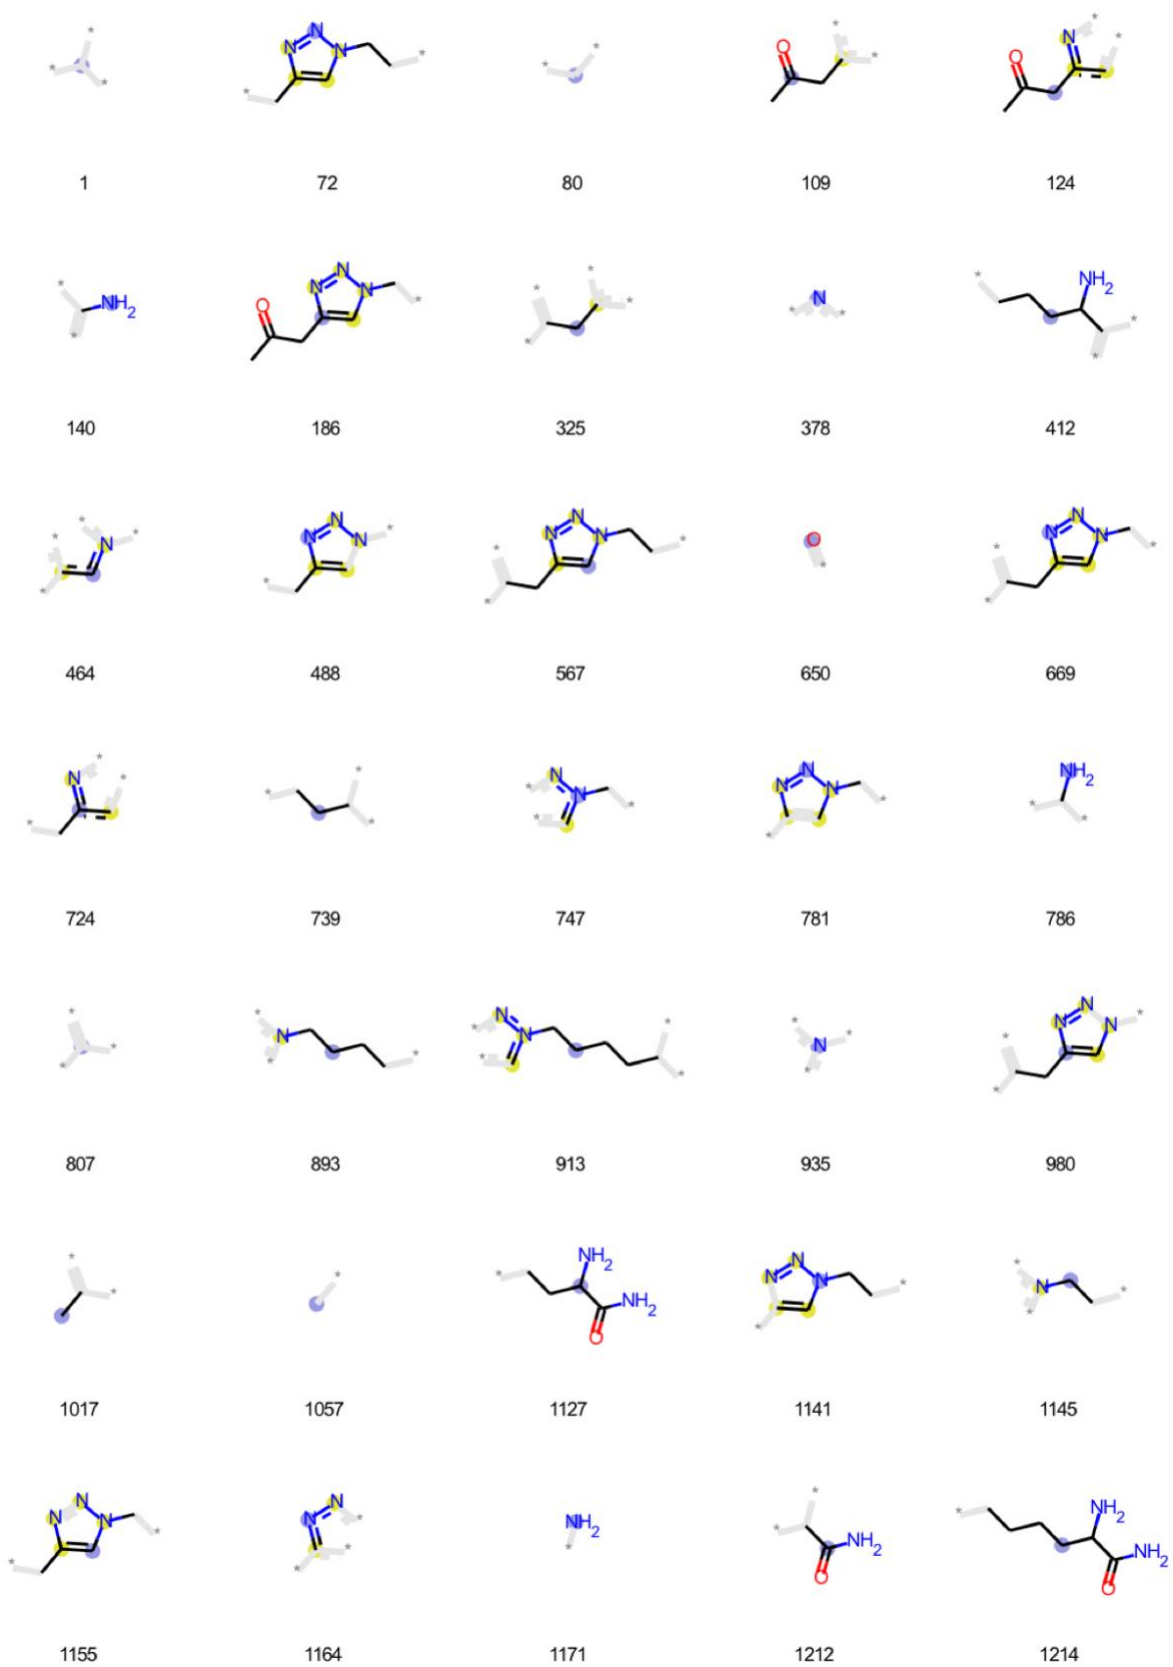

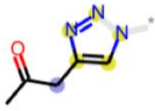

1259

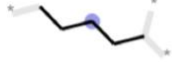

1283

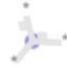

1380

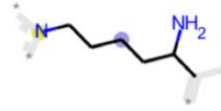

1536

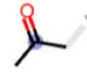

1550

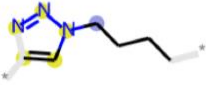

1582

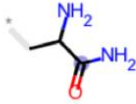

1654

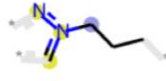

1689

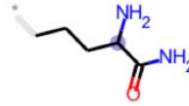

1728

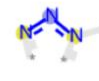

1783

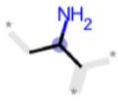

1849

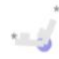

1873

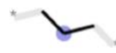

1911

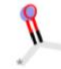

1917

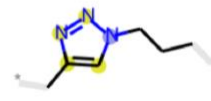

1971

# Alanine

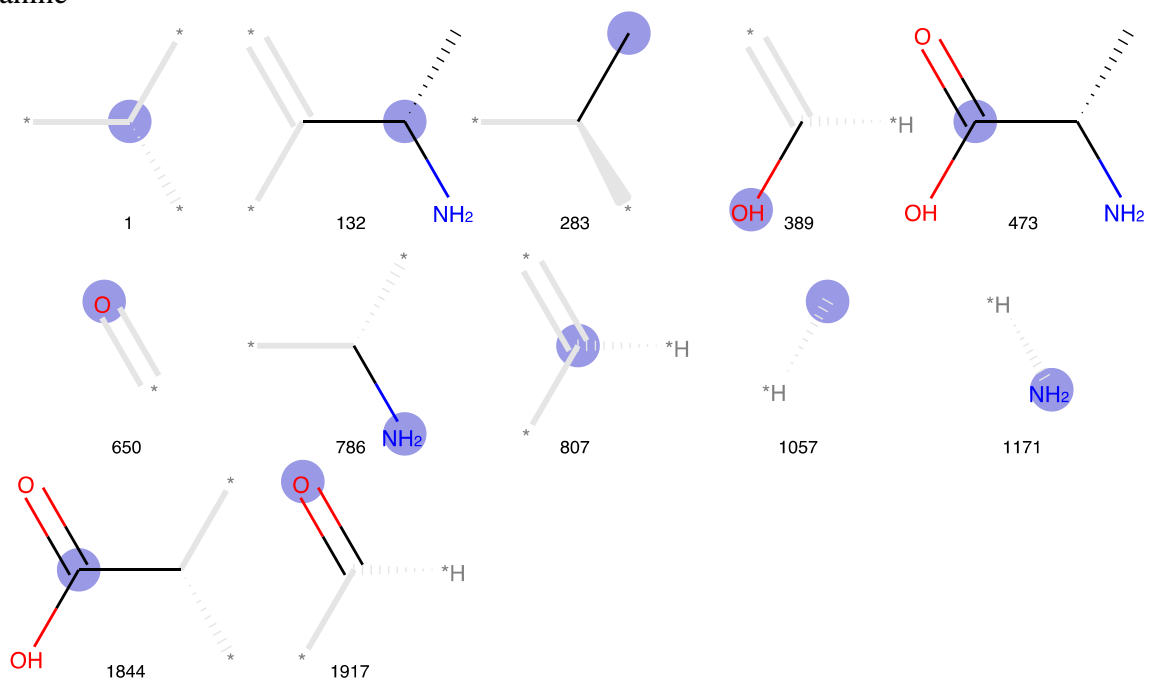

# Beta-Alanine

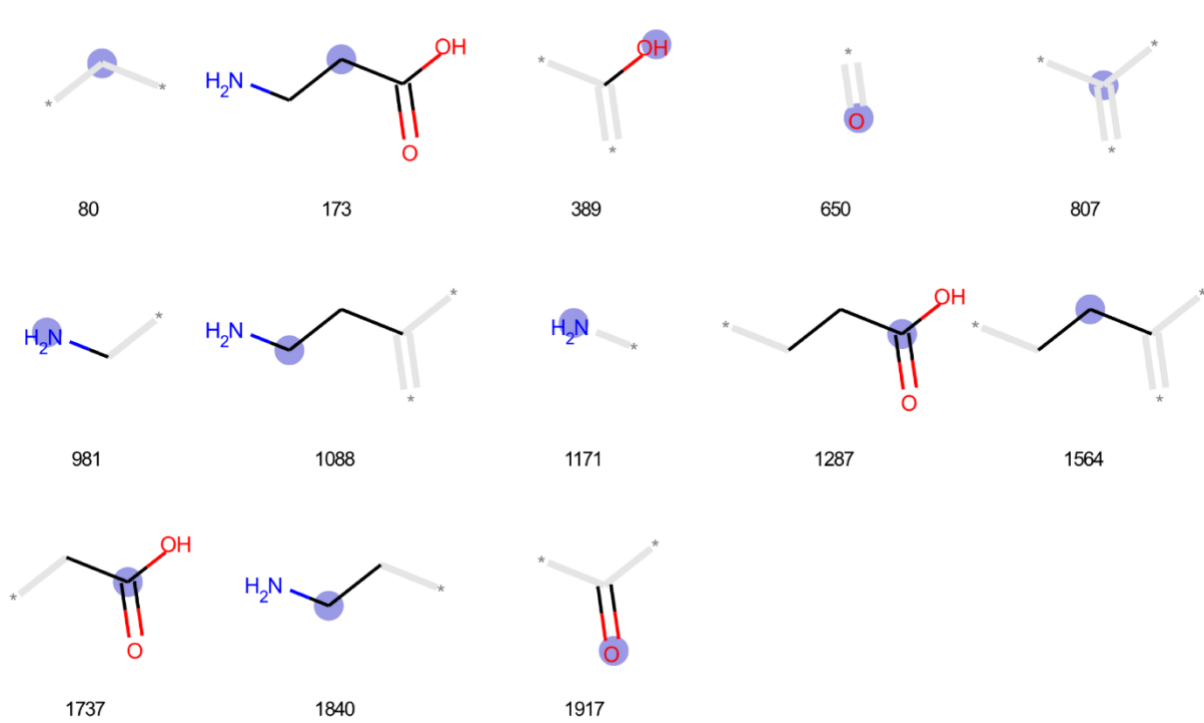

# Aminohexanoic acid

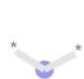

80

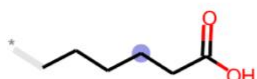

295

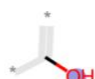

389

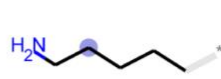

561

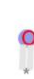

650

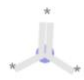

807

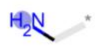

981

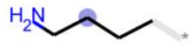

1082

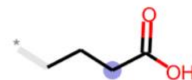

1110

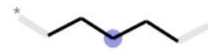

1143

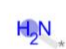

1171

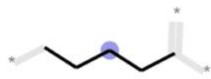

1267

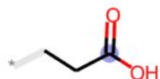

1287

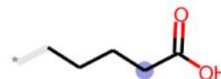

1301

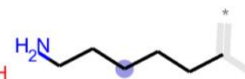

1462

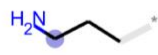

1517

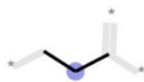

1564

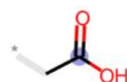

1737

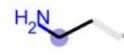

1840

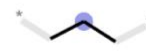

1911

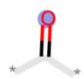

1917

# Arginine

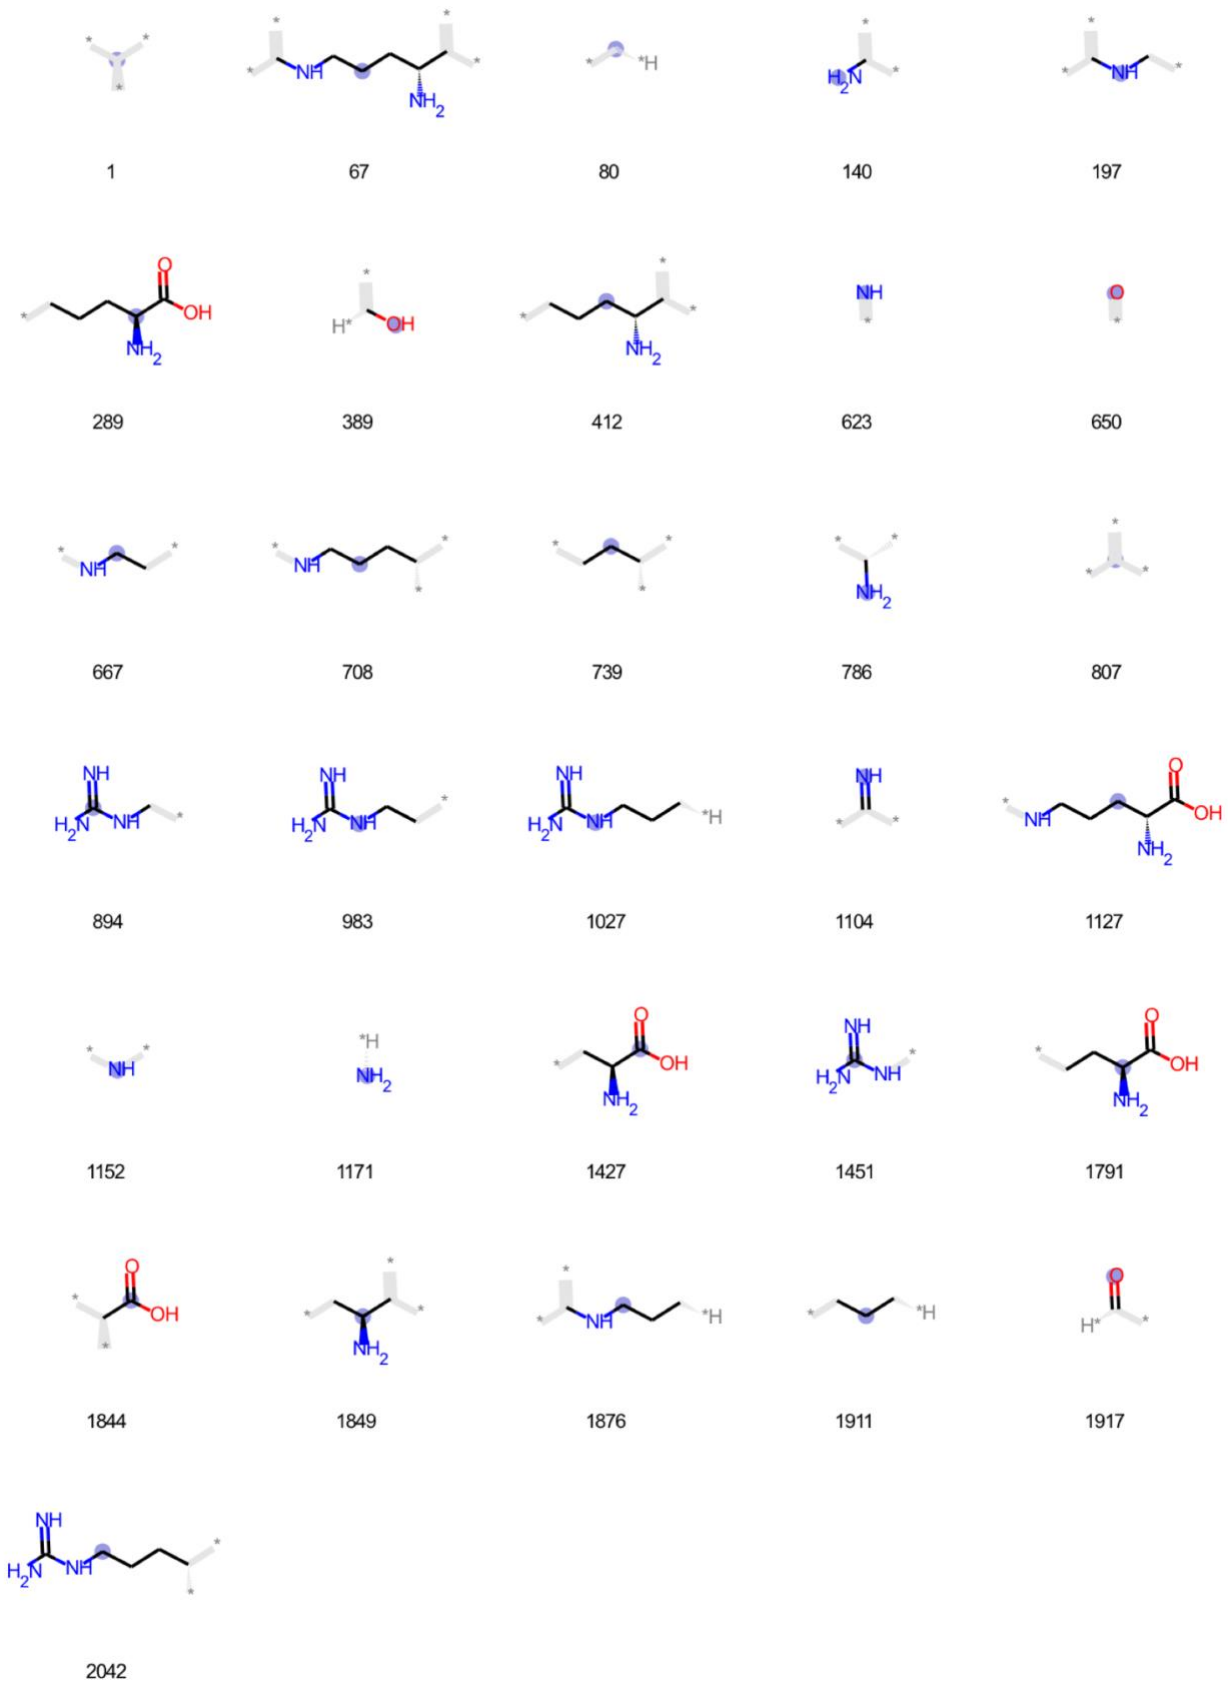

# Asparagine

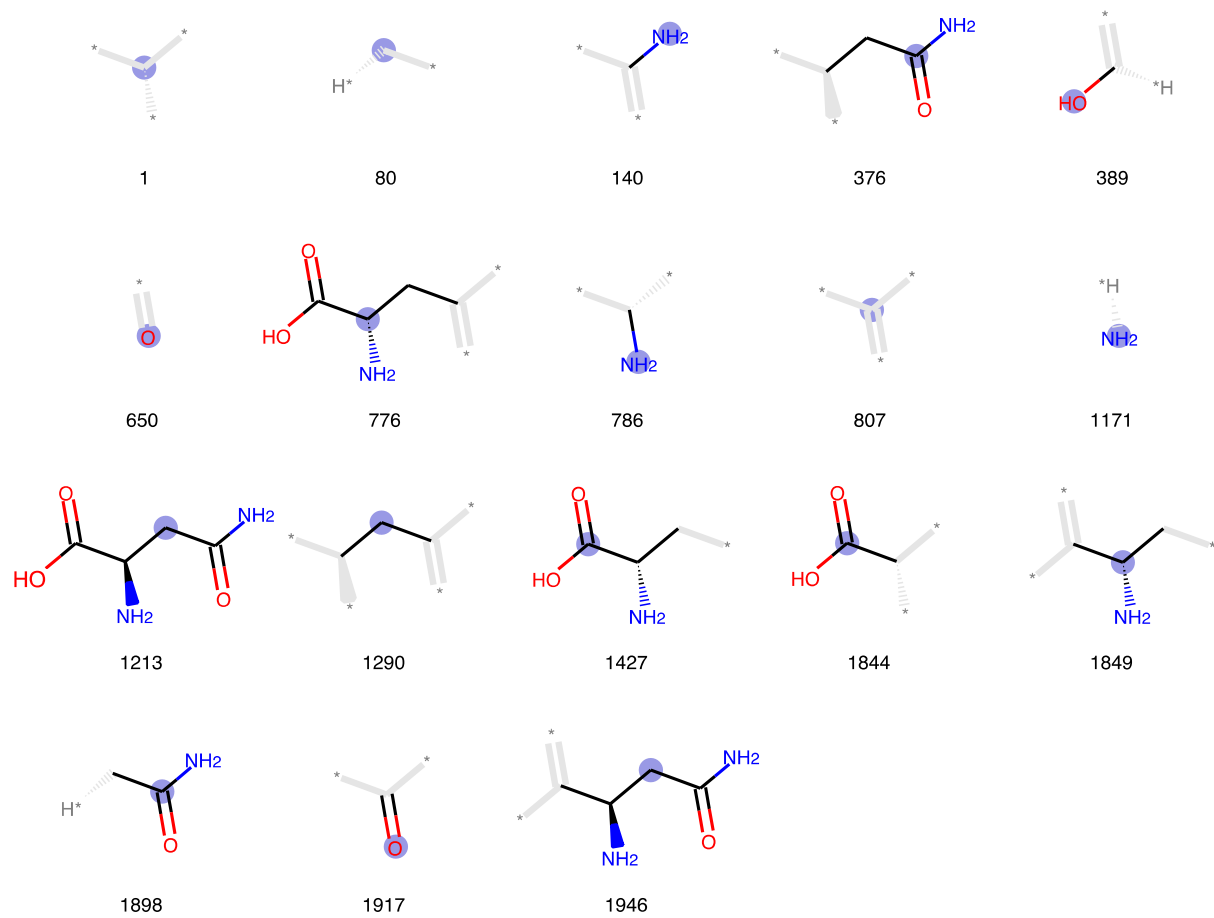



# Aspartic acid

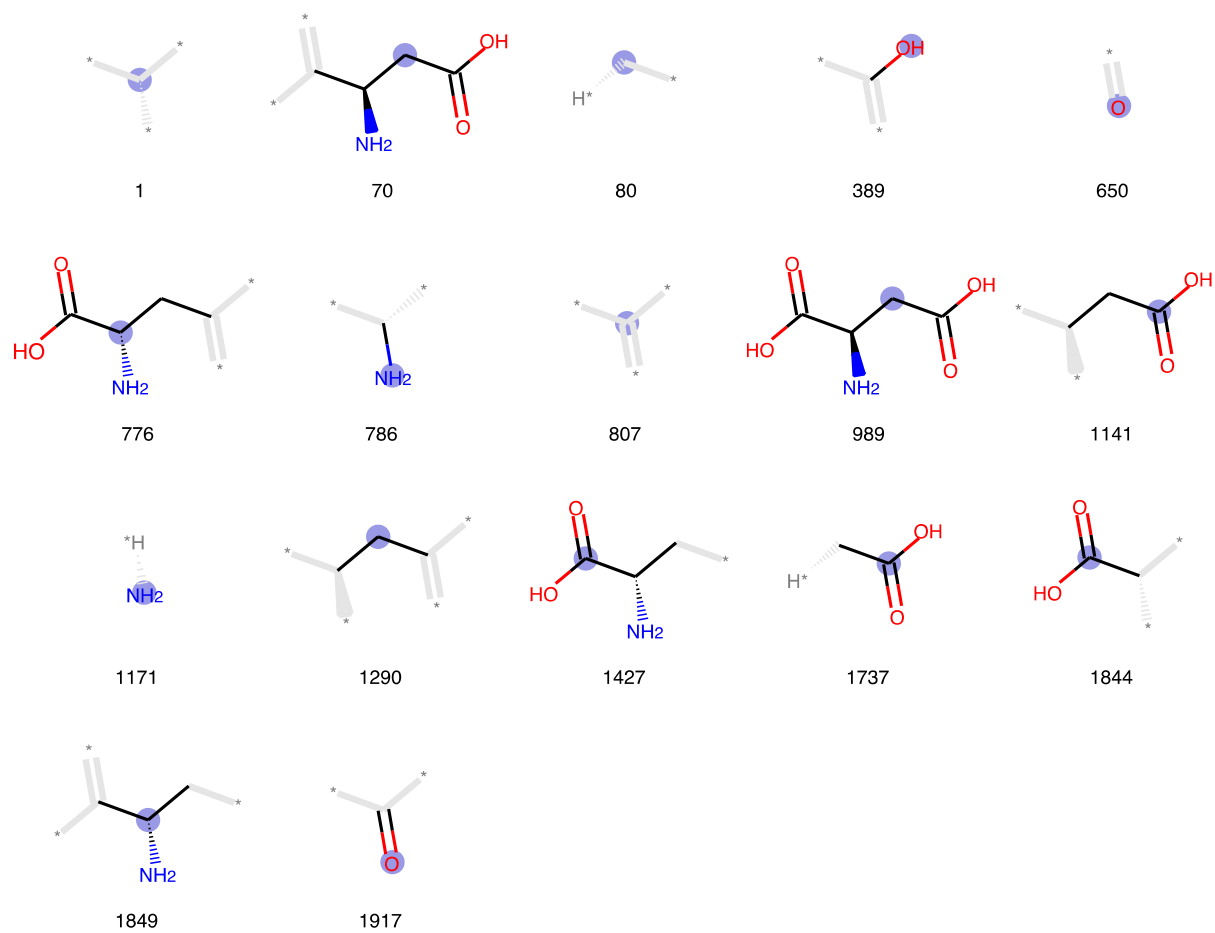

# Cysteine

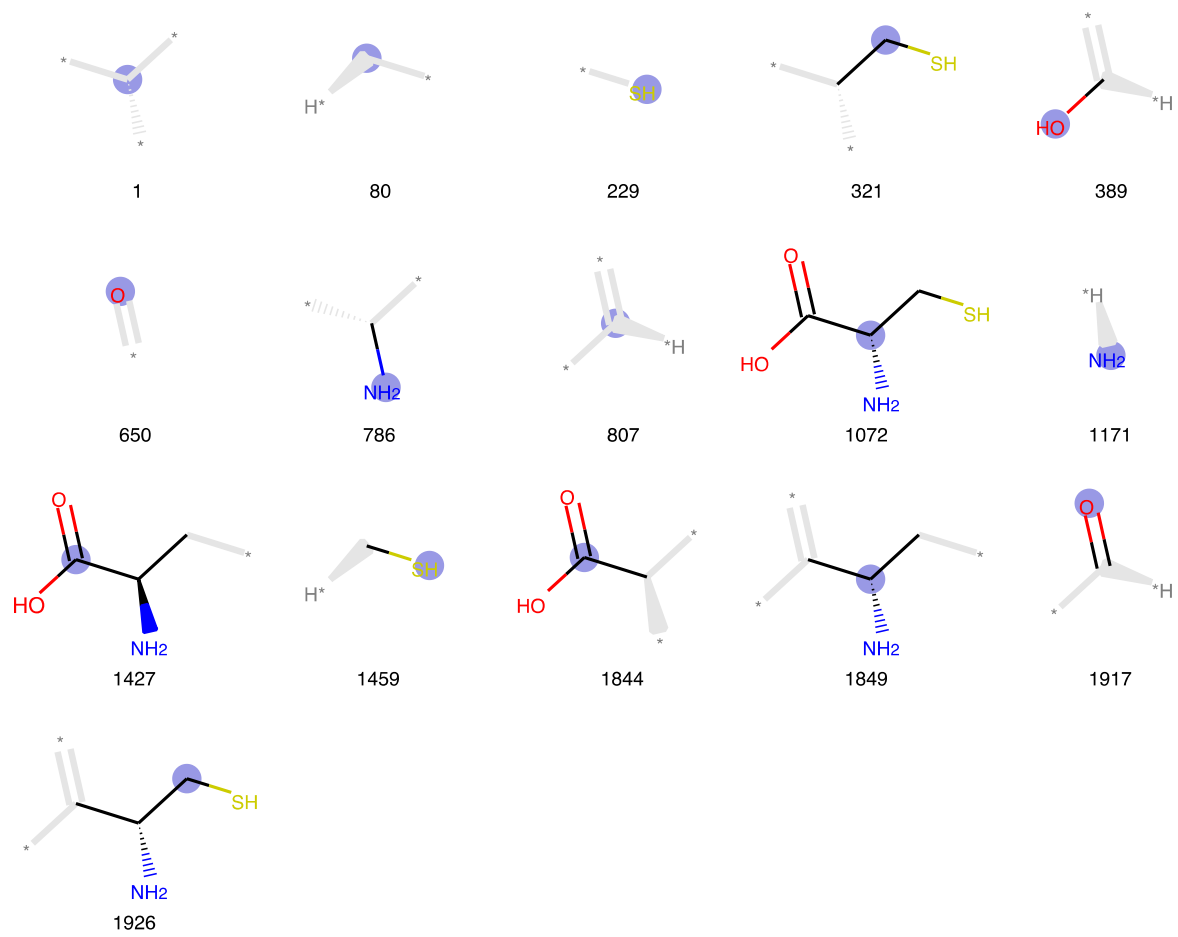

# Glutamic acid

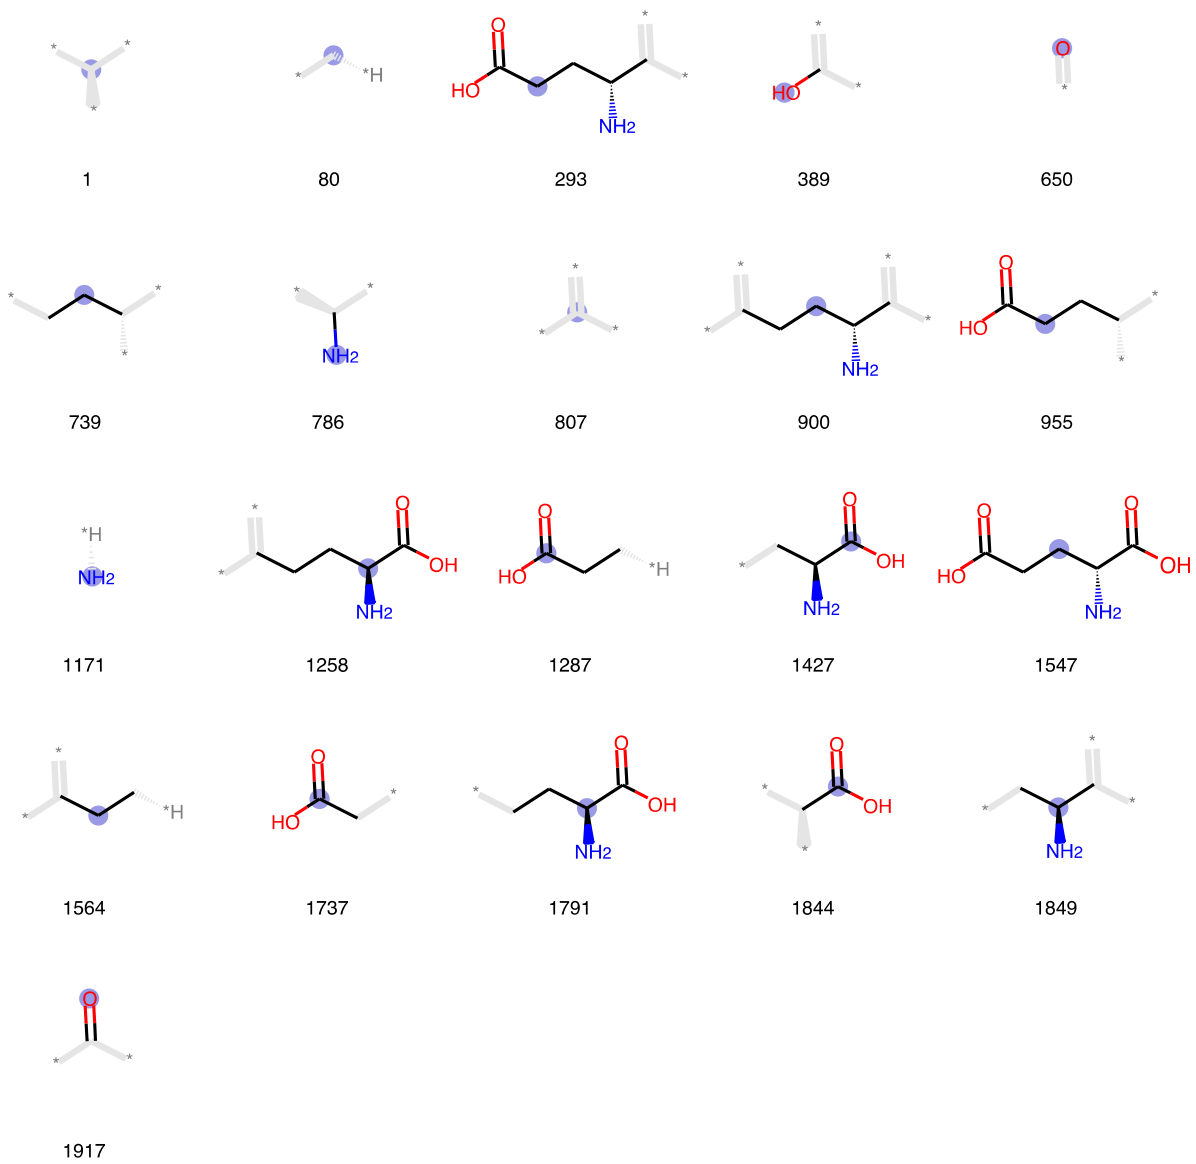

# Glutamine

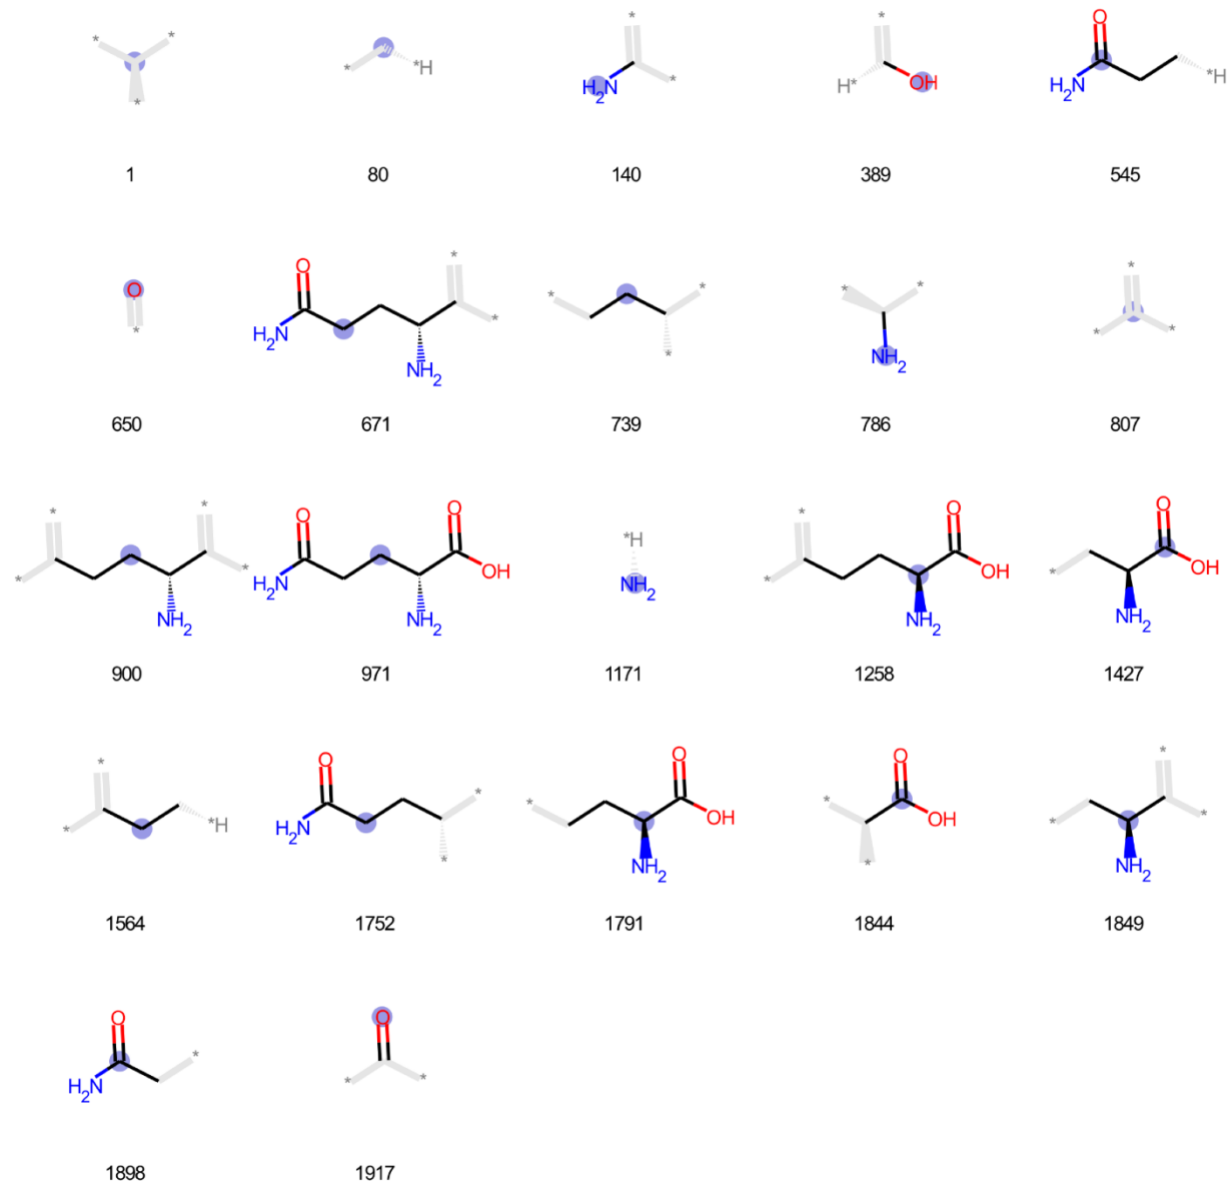

# Glycine

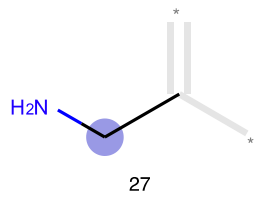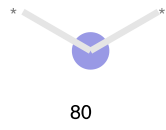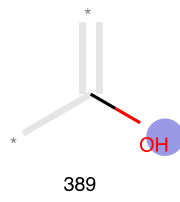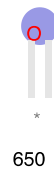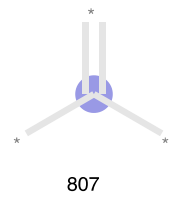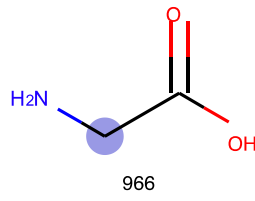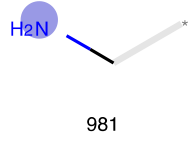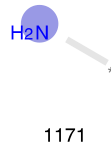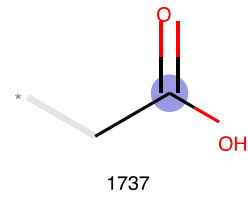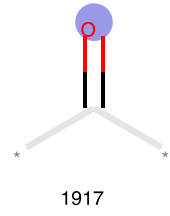

# Histidine

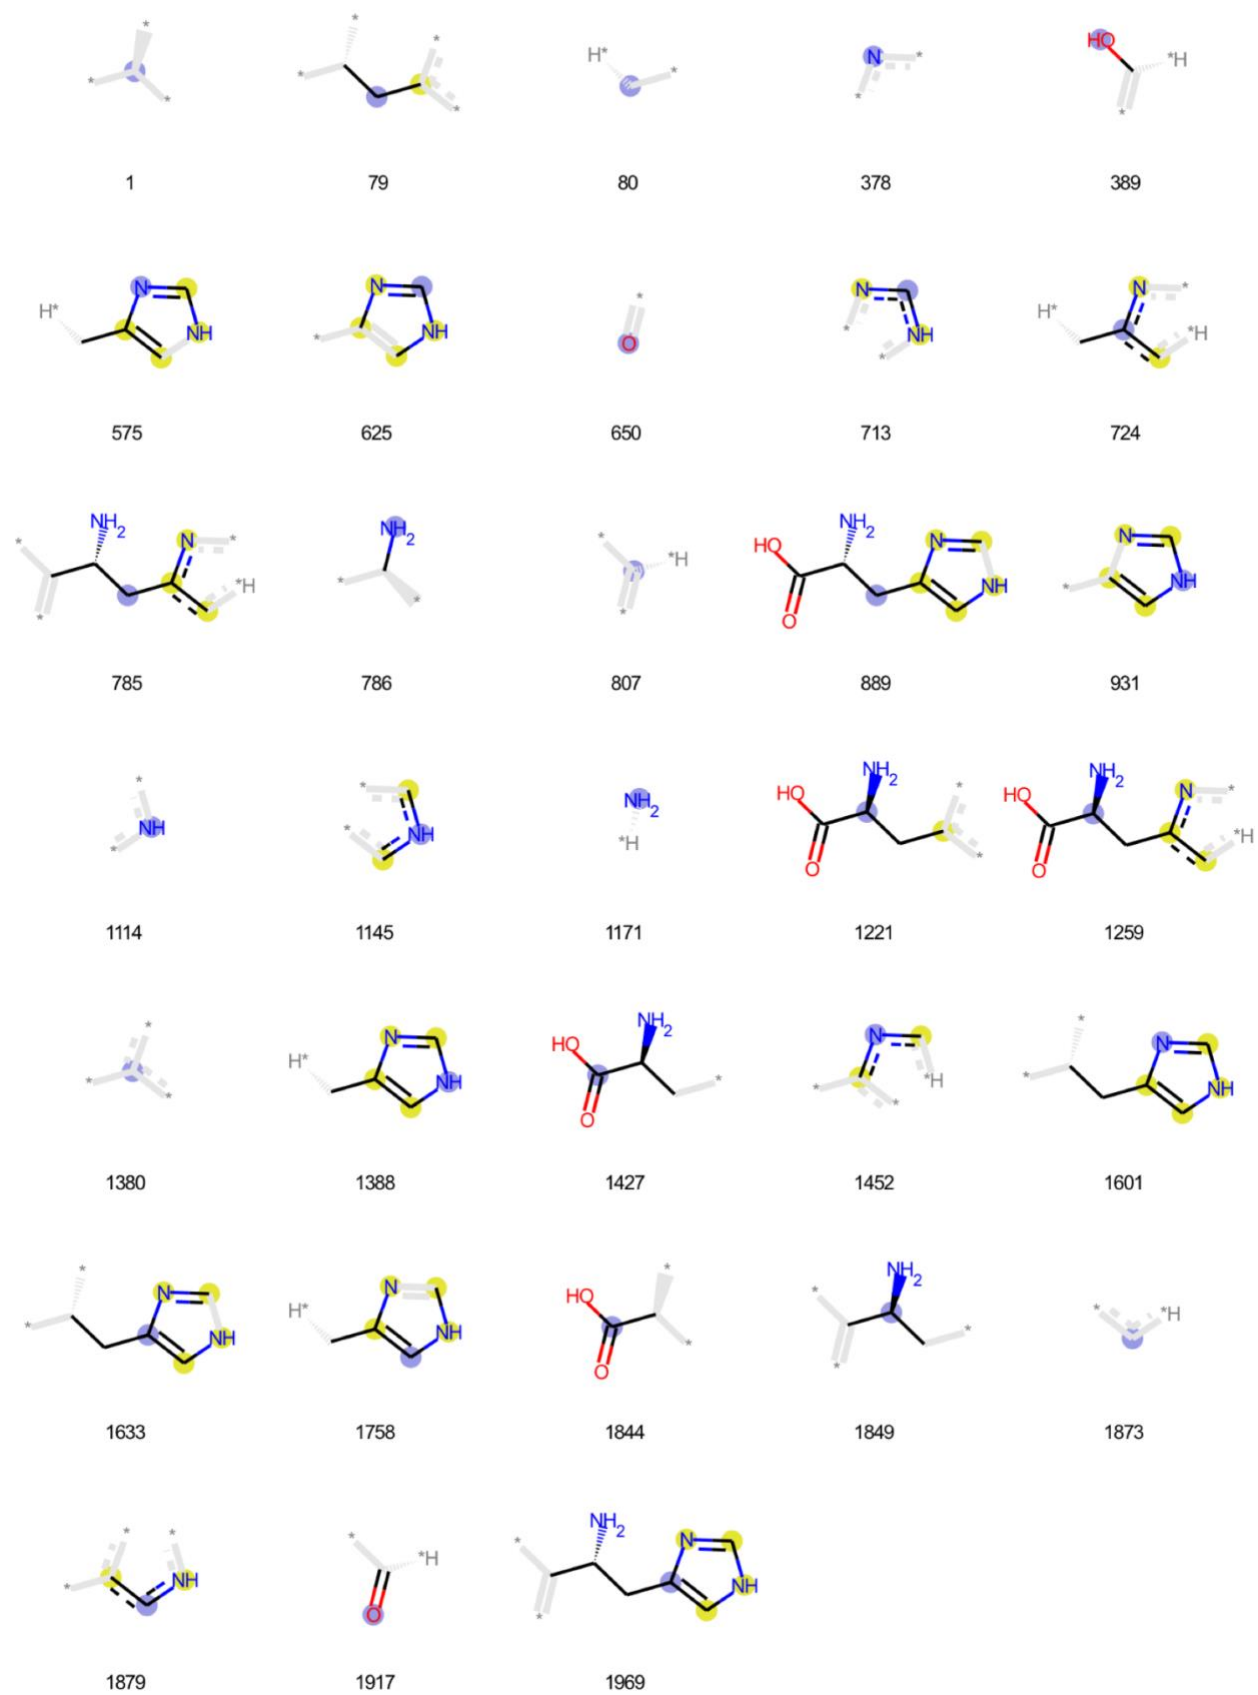

# Isoleucine

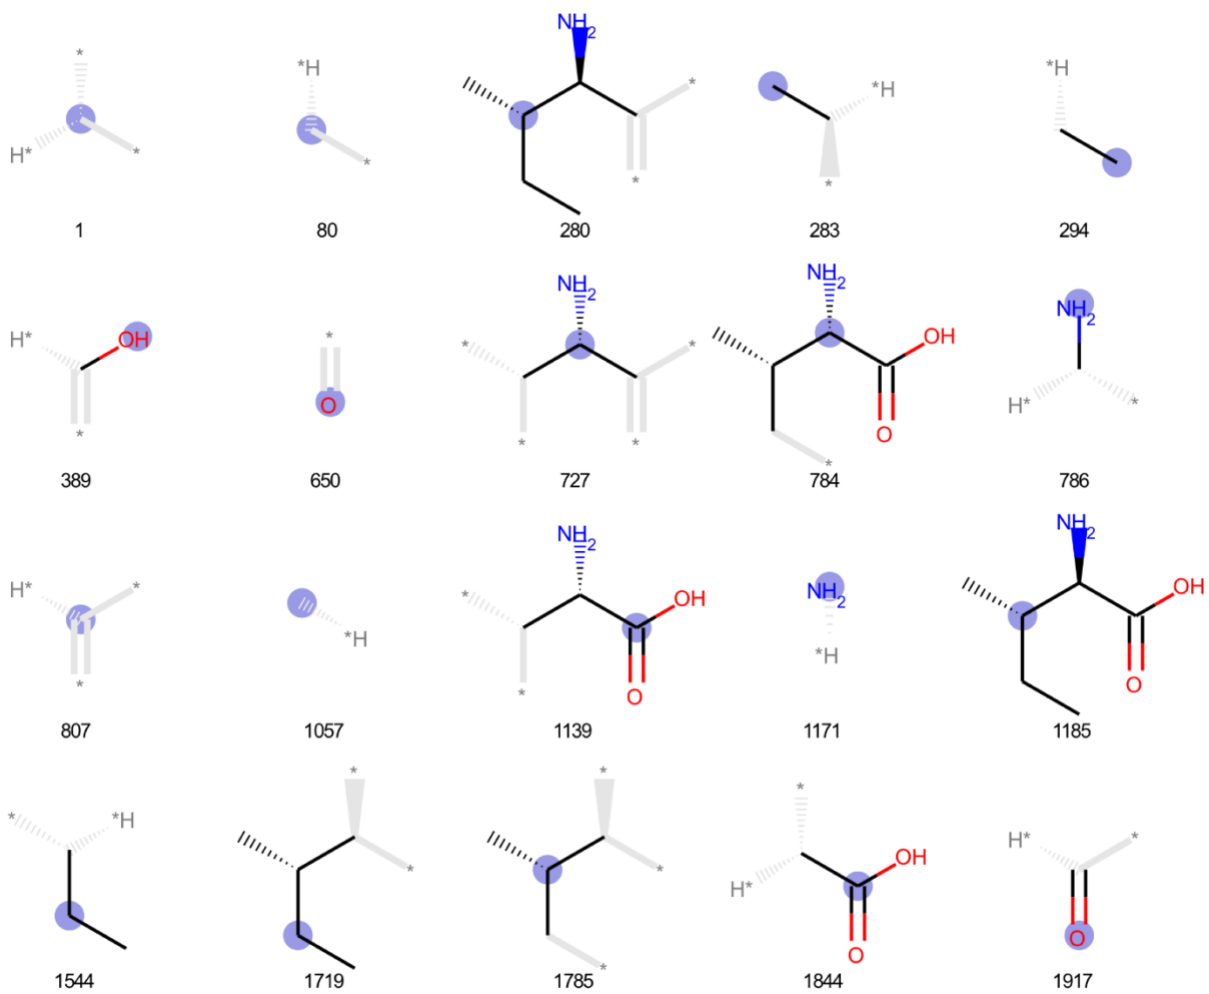

# Leucine

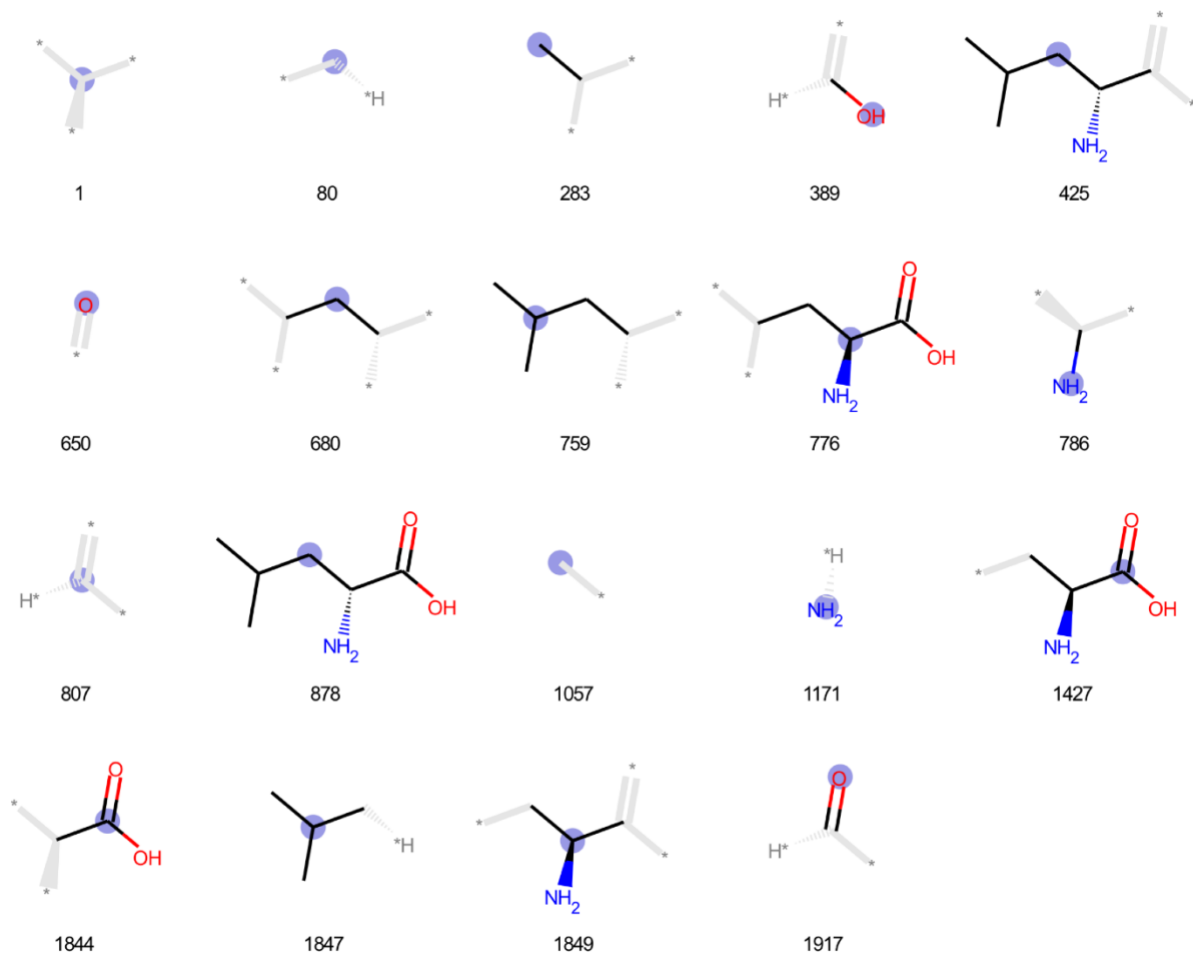



# Lysine

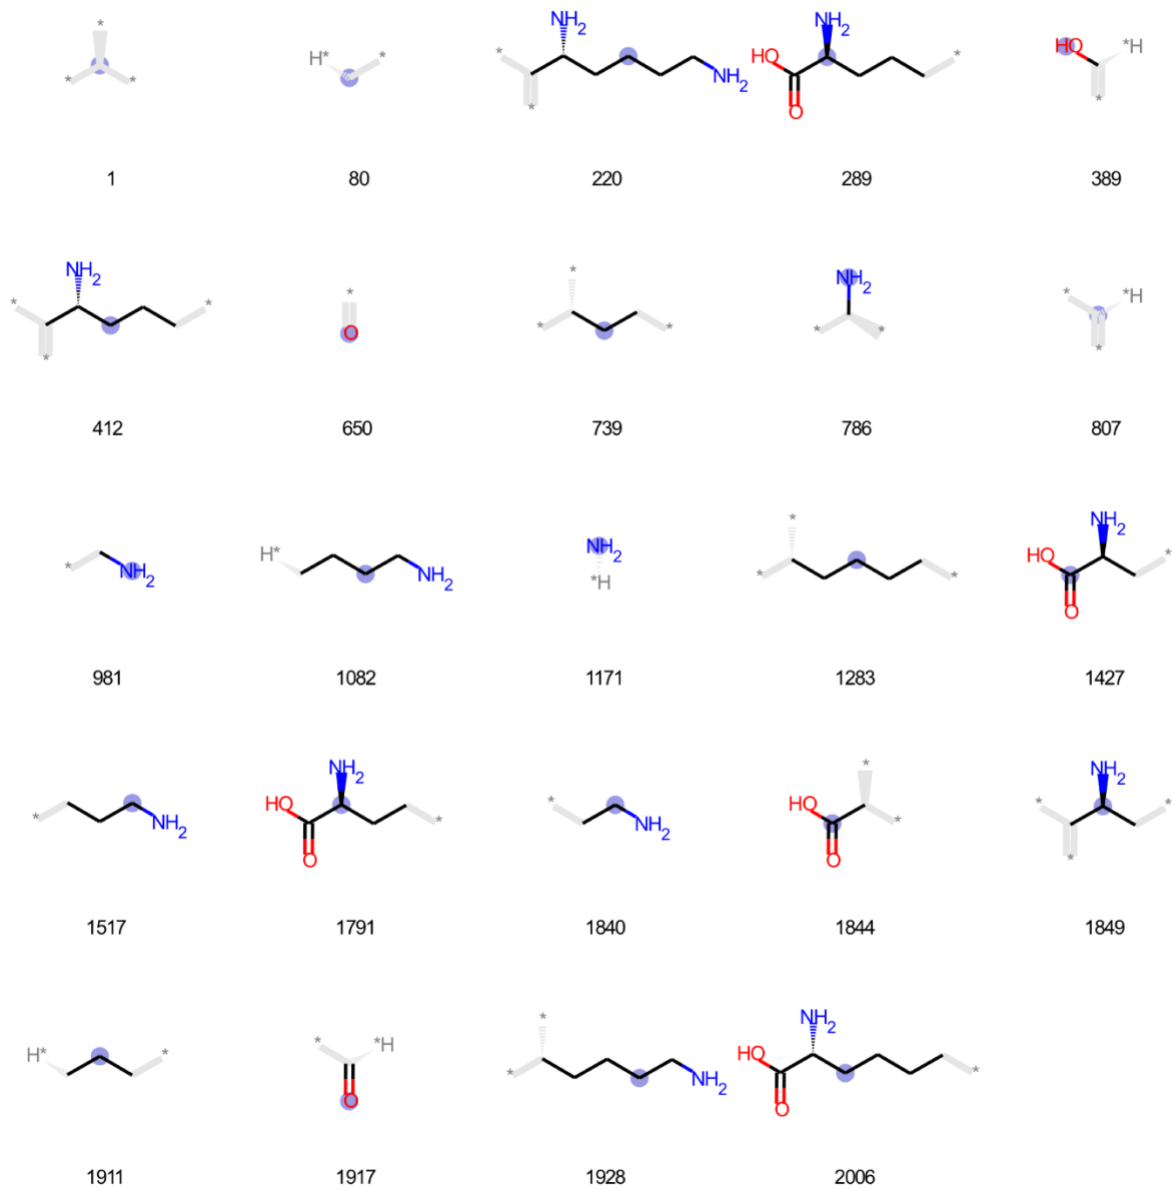

# Methionine

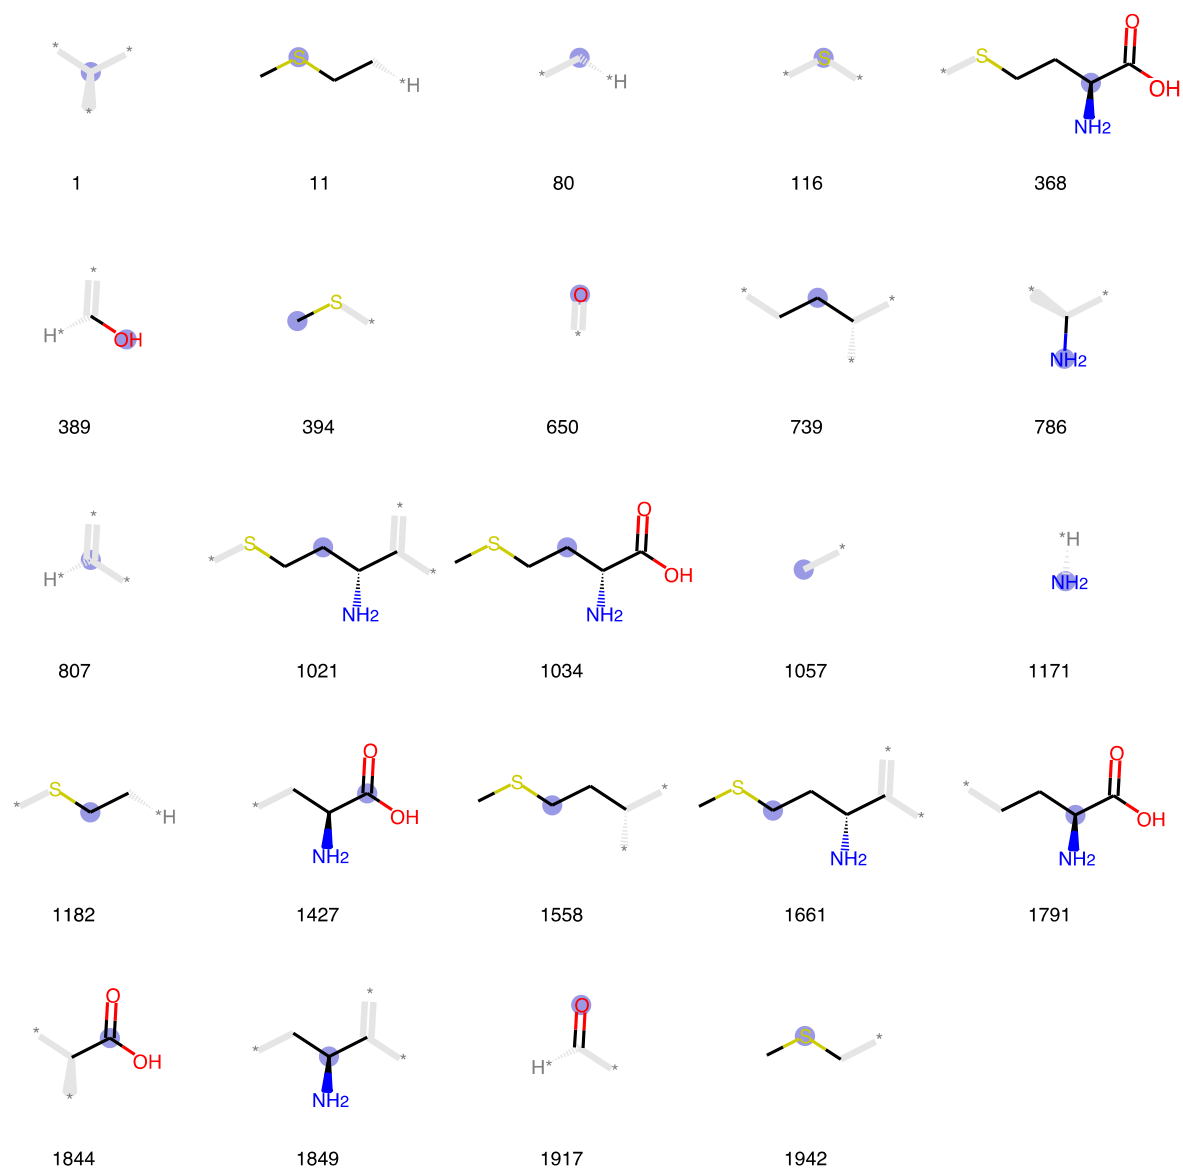

# Phenylalanine

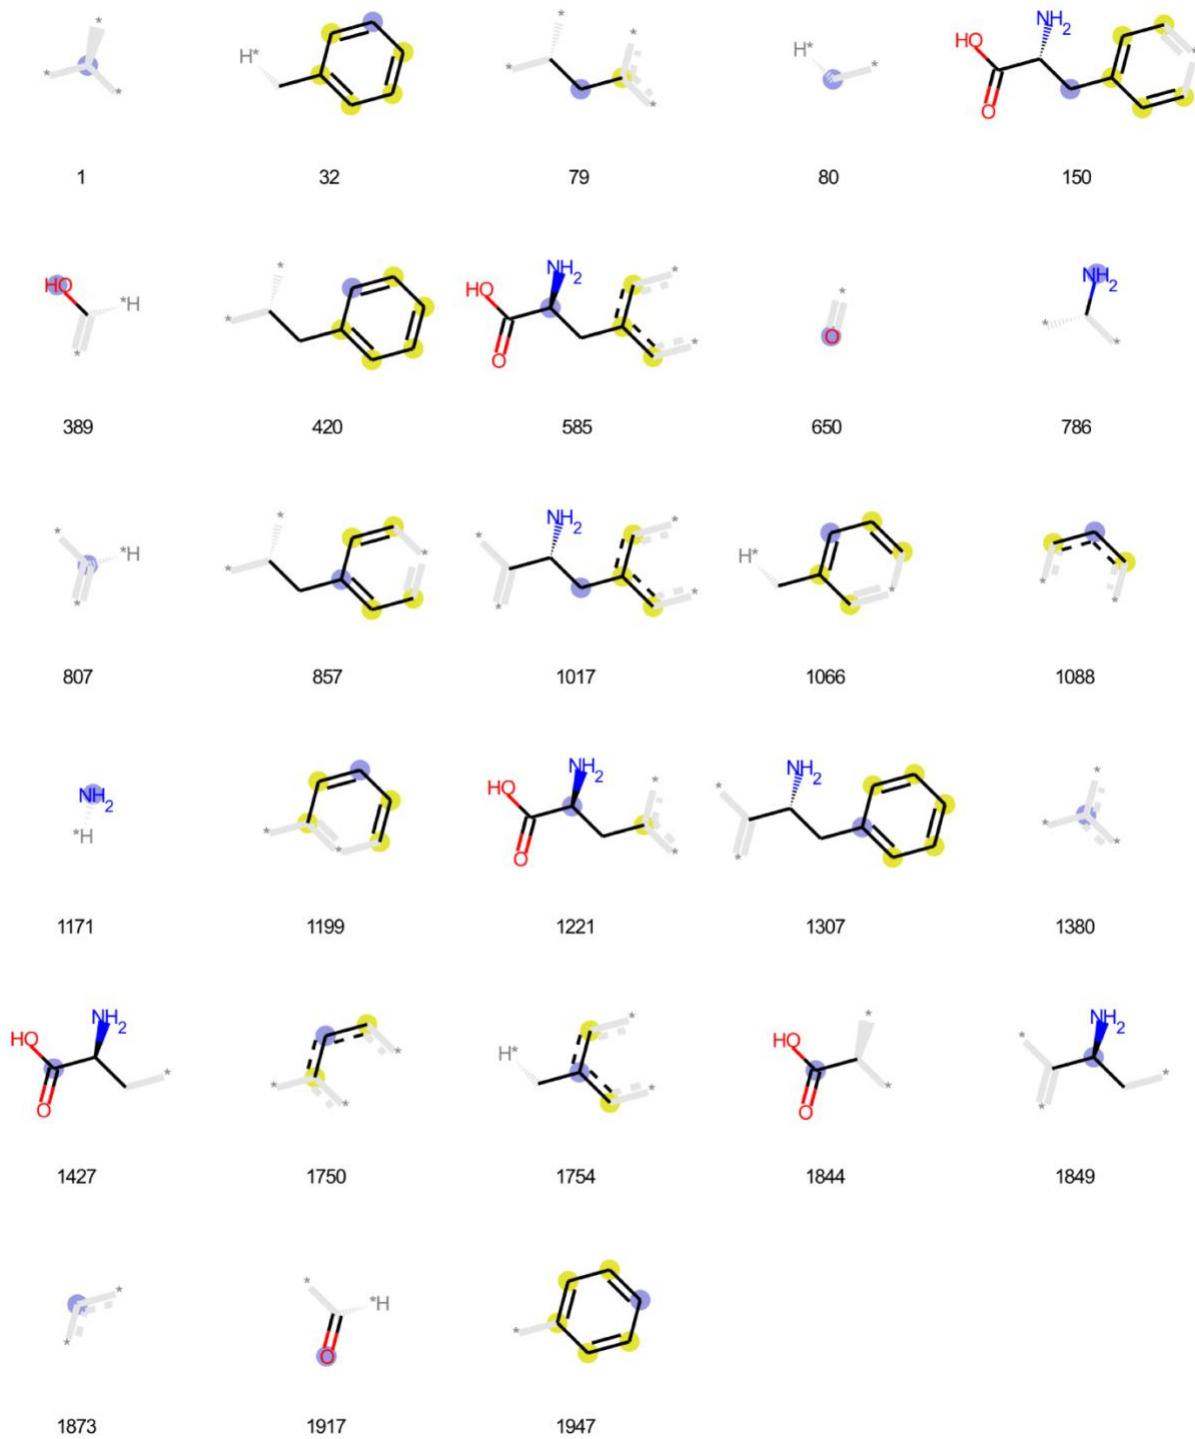

# Proline

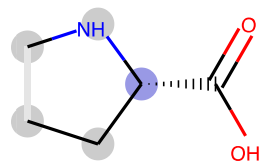

74

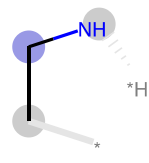

305

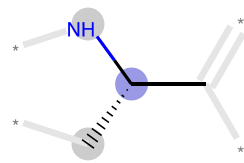

362

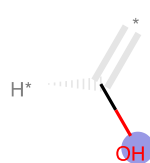

389

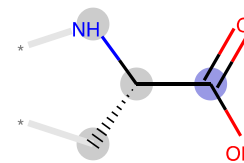

553

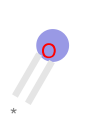

650

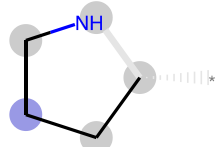

742

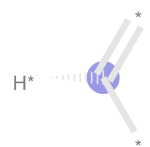

807

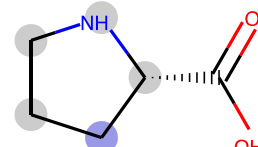

831

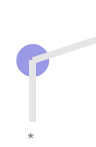

926

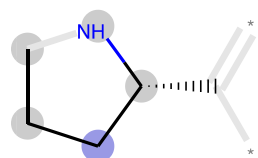

1014

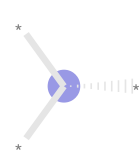

1019

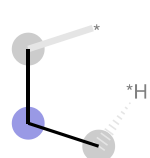

1028

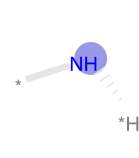

1114

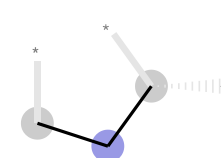

1325

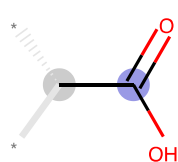

1431

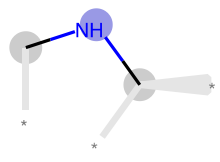

1507

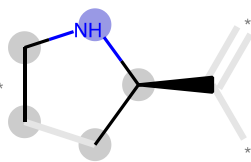

1736

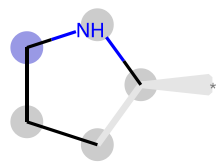

1912

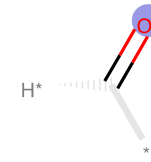

1917

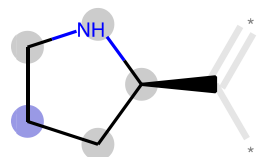

2022

# Serine

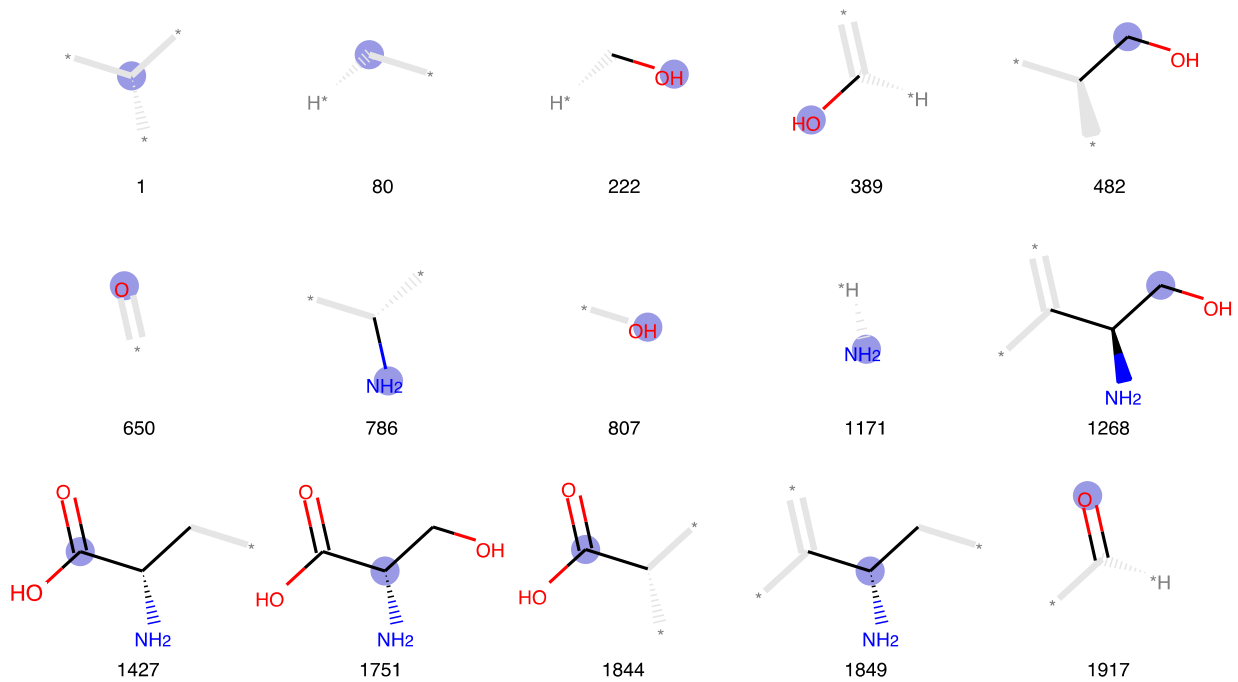

# Threonine

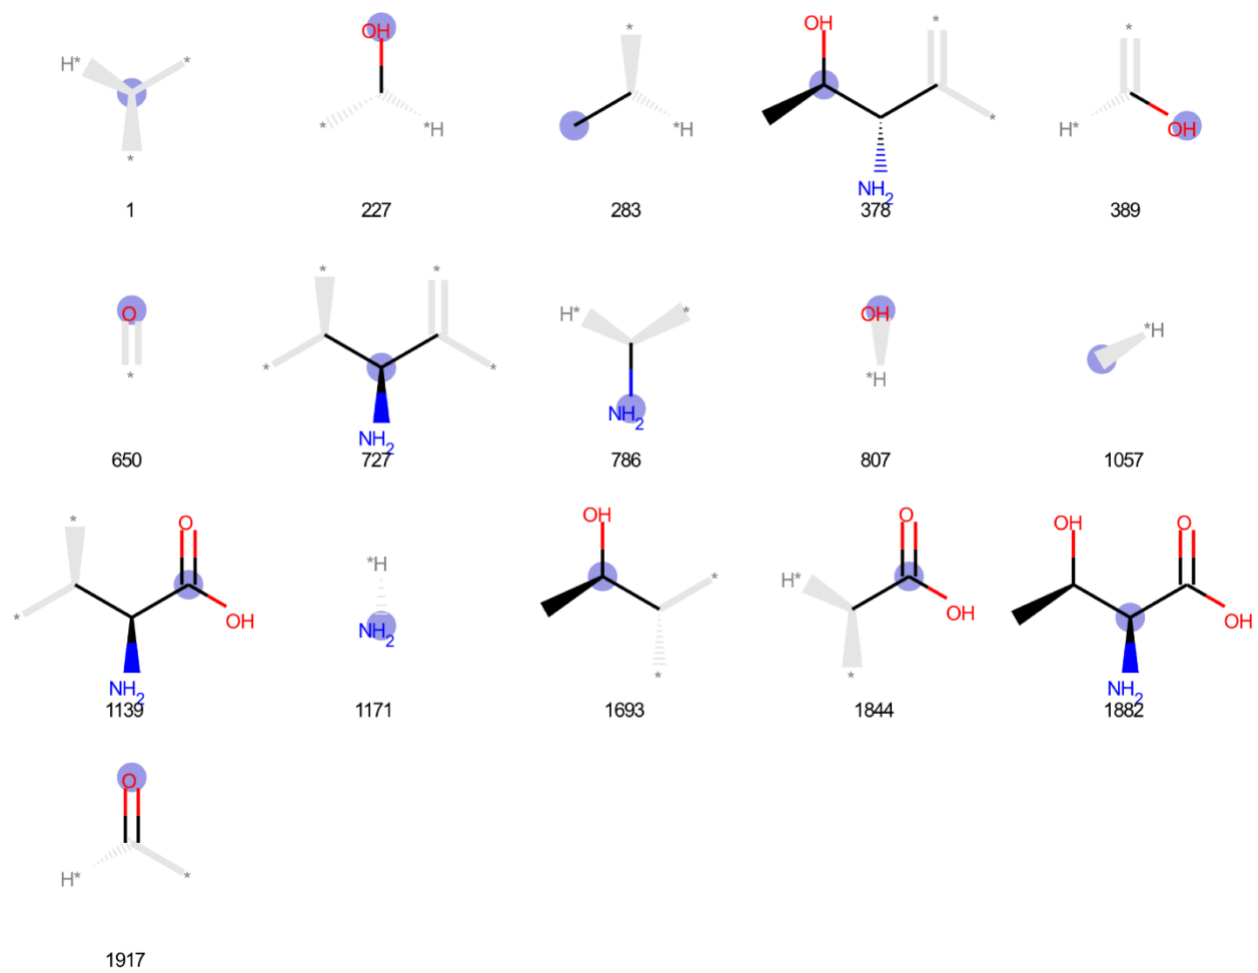

# Tryptophan

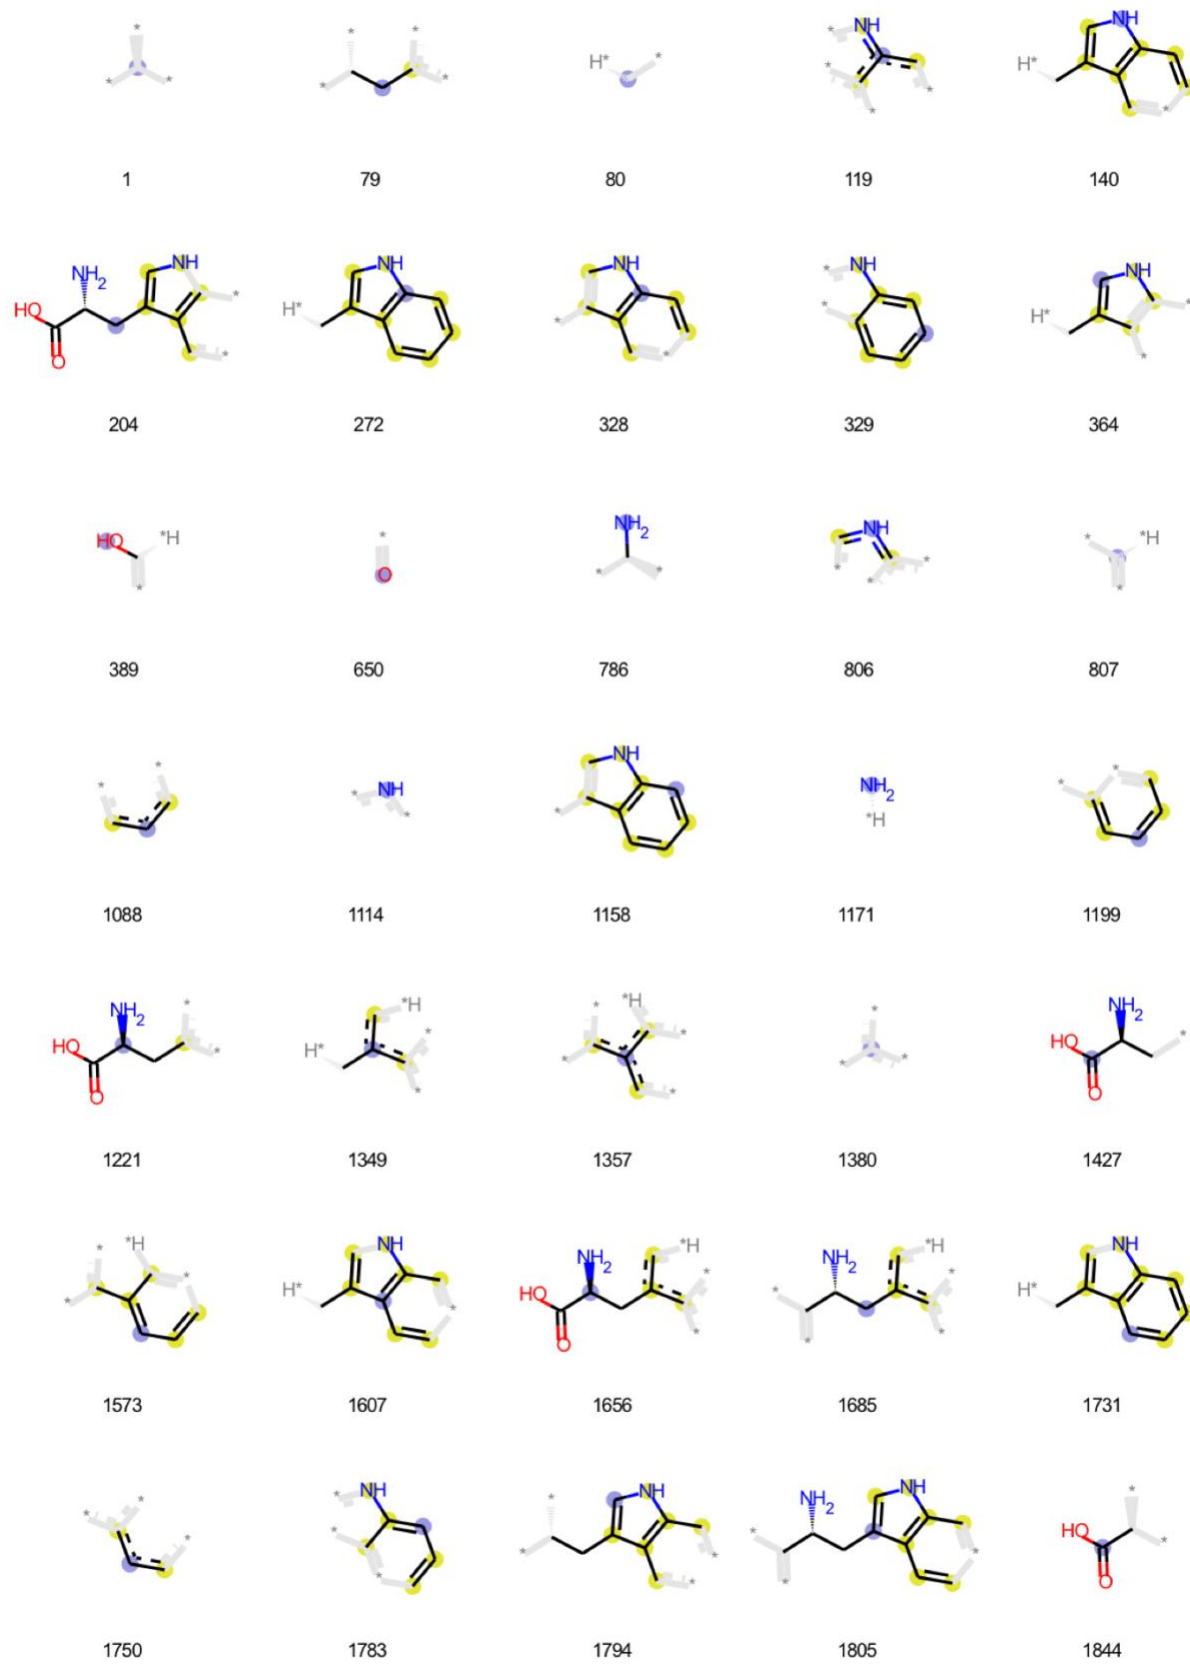

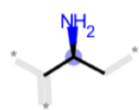

1849

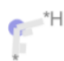

1873

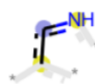

1879

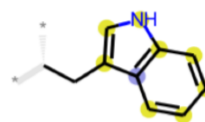

1910

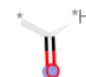

1917

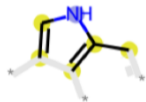

1937

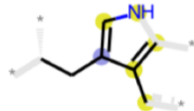

1970

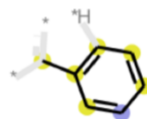

2013



# Tyrosine

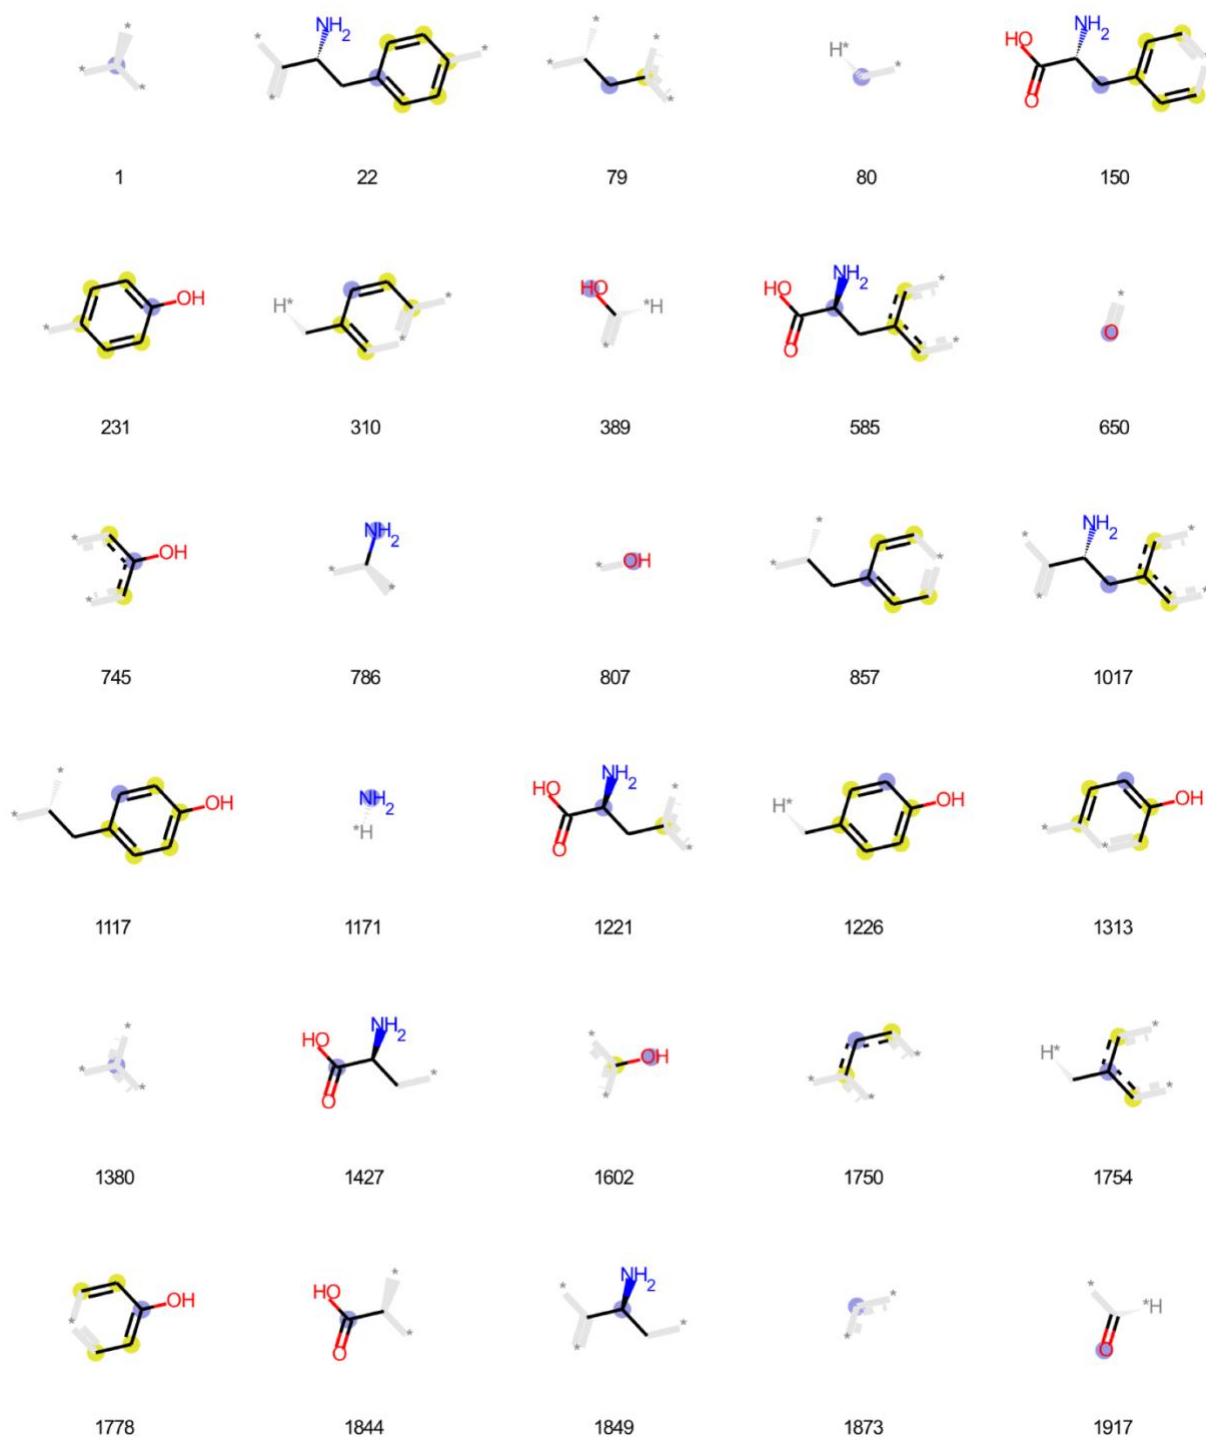

# Valine

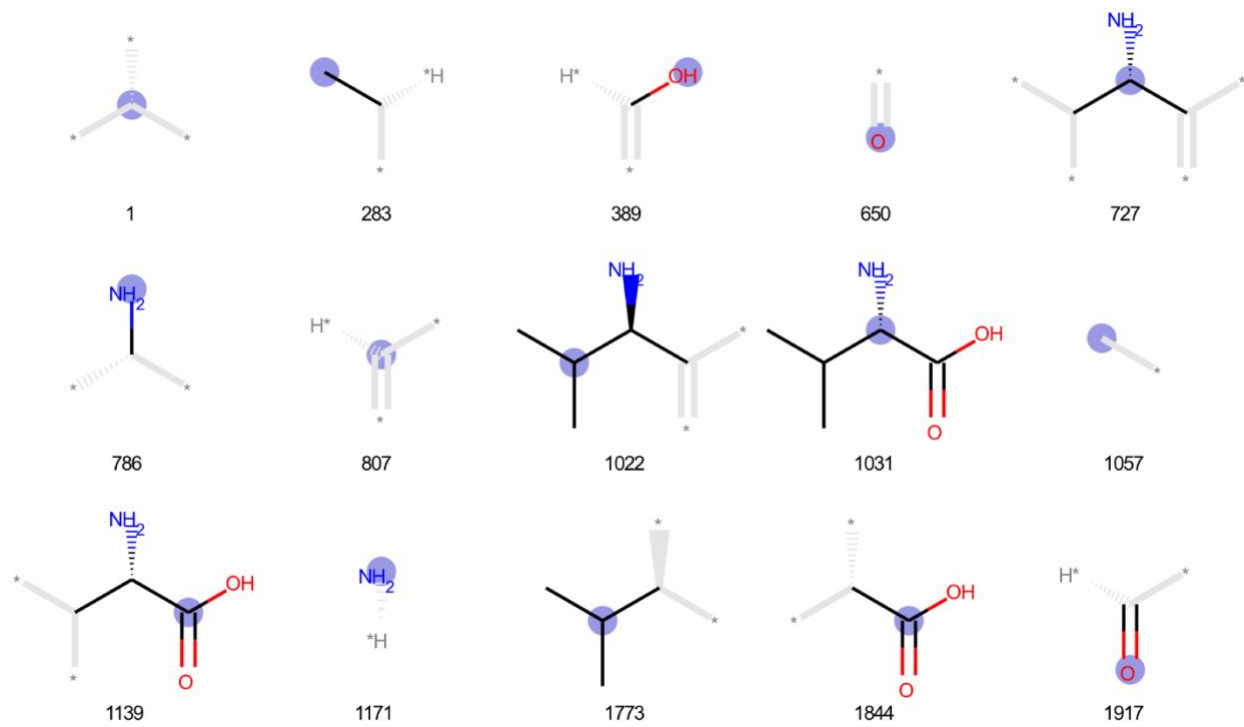

### Appendix 3: Example of flow cytometry gating strategy

Gates were created using the cell-only control, and applied to experimental samples. Gates were applied to the main cell population on the SSC vs FSC density plot, and then to the SSC and FSC density plots, respectively, in order to exclude outlying cells. Finally, outlying cells labeled by PerCP were excluded, and the mean fluorescence intensity of FITC was obtained.

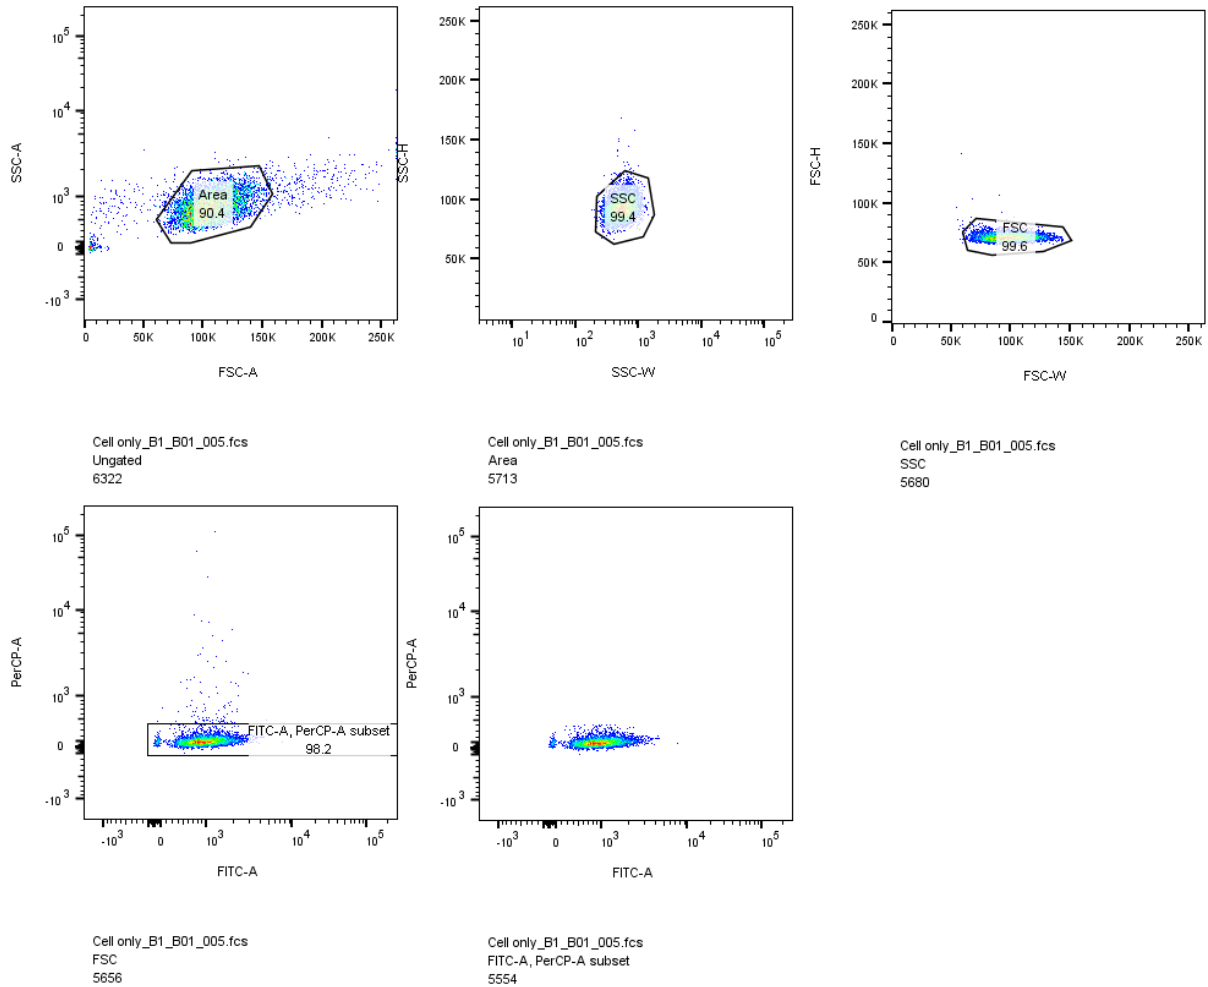

Supplement: NIHMS1773779-supplement-Supplementary_Information.pdf [file NIHMS1773779-supplement-Supplementary_Information.pdf]
